# Supplementary material for: Visible-light-induced acylation/cyclization of active alkenes: facile access to acylated isoquinolinones
Source: Royal Society of Chemistry journal article supplement (doi:10.1039/d2ob00528j), 2022-01-01

# Supporting Information

## Visible-Light-Induced Acylation/Cyclization of Active Alkenes: Facile Access to Acylated Isoquinolinones

Yang Guo,<sup>†</sup> Peng-Fei Huang,<sup>†</sup> Yu Liu and Bin-Hong He\*

<sup>a</sup> Department of Chemistry and Chemical Engineering, Hunan Institute of Science and Technology, Yueyang 414006, China

[phone and fax number: +86073-0864-0122 and E-mail addresses: hbhhd@126.com

### List of Contents

|                                                                        |           |
|------------------------------------------------------------------------|-----------|
| <b>1. General Information</b>                                          | <b>S1</b> |
| <b>2. Experimental Section</b>                                         | <b>S1</b> |
| <b>2.1. General Procedure for the Synthesis of Substrates</b>          | <b>S1</b> |
| <b>2.2. Typical Experimental Procedure</b>                             | <b>S1</b> |
| <b>2.3. Table S1: Screening of optimal <i>O</i>-benzoic acyl oxime</b> | <b>S2</b> |
| <b>2.4. Control Experiments</b>                                        | <b>S3</b> |
| <b>3. Reference</b>                                                    | <b>S7</b> |
| <b>4. <sup>1</sup>H and <sup>13</sup>C spectra</b>                     | <b>S8</b> |

## 1. General Information

Unless otherwise stated, all commercial reagents were used as received. Propiophenone, aldehydes (Innochem, >98%), Phenylhydrazine hydrochloride and *o*-Phenylenediamine were used without further treatment. All reagents and solvents were commercially available and used without any further purification unless specified. All solvents were dried and distilled according to standard procedures. Flash column chromatography was performed using silica gel (0.25mm, 300-400 mesh). Analytical thin-layer chromatography was performed using glass plates pre-coated with 0.25mm 300-400 mesh silica gel impregnated with a fluorescent indicator (254 nm). All reactions were carried out with magnetic stirring and in dried glassware. Nuclear magnetic resonance (NMR) spectra are recorded in parts per million from internal tetramethylsilane on the  $\delta$  scale.  $^1\text{H}$  NMR,  $^{19}\text{F}$  NMR and  $^{13}\text{C}$  NMR spectra were recorded in  $\text{CDCl}_3$  on a Bruker DRX-400 spectrometer operating at 400 MHz, 376 MHz and 100 MHz, respectively. All chemical shift values are quoted in ppm and coupling constants quoted in Hz. The solvent peak was used as a reference value, for  $^1\text{H}$  NMR: TMS = 0.00 ppm, for  $^{13}\text{C}$  NMR:  $\text{CDCl}_3$  = 77.00 ppm. The following abbreviations were used to explain multiplicities: s = singlet, d = doublet, dd = doublet of doublet, t = triplet, td = triplet of doublet, q = quartet, m = multiplet, and br = broad. High-resolution mass spectra (HRMS) were obtained on an Agilent mass spectrometer using ESI-TOF (electrospray ionization-time of flight).

## 2. Experiment Section

### 2.1. General Procedure for the Synthesis of Substrates

All 2-aryl indoles **1**<sup>[1]</sup> and acyl oxime esters **2**<sup>[2-3]</sup> were synthesized according to the known methods.

### 2.2. Typical Experimental Procedure

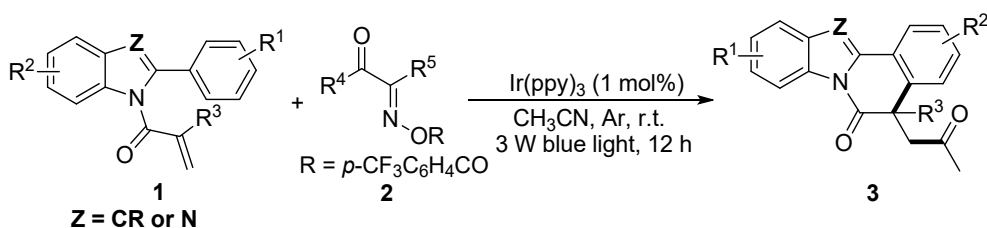

To a Schlenk tube were added 2-aryl indoles **1** (0.2 mmol, 0.1 M), acyl oxime esters **2** (0.3 mmol, 1.5 equiv), Ir(ppy)<sub>3</sub> (1 mol %) and MeCN (2 mL) at room temperature under irradiation of 3 W blue light for 12 h. Until complete consumption of the starting material was observed by TLC and/or GC-MS analysis. After the reaction was finished, the reaction mixture removal of the solvent, the crude product was purified by column chromatography (petroleum ether/ethyl acetate, 5 : 1) to provide the desired products **3**. A scaled-up experiment conducted in the presence of **1a** (1 mmol), **2a** (1.5 mmol, 1.5 equiv), Ir(ppy)<sub>3</sub> (0.01 mmol, 1 mol %) and MeCN (10 mL) at 25 °C under irradiation of 3 W blue light for 12 h gave the target product **3aa** in 77% yield.

The light source bought from SANYI ([https://item.taobao.com/item.htm?spm=a1z09.2.0.0.42672e8dv2Chsz&id=35497290577&\\_u=j35sh1qt9325](https://item.taobao.com/item.htm?spm=a1z09.2.0.0.42672e8dv2Chsz&id=35497290577&_u=j35sh1qt9325)), 3 W blue LED light bulb (E27). The wavelength was about 460-470 nm and the wavelength of peak intensity was about 467.5 nm. The pictures of the visible-light source (Figure S1) were shown as follow:

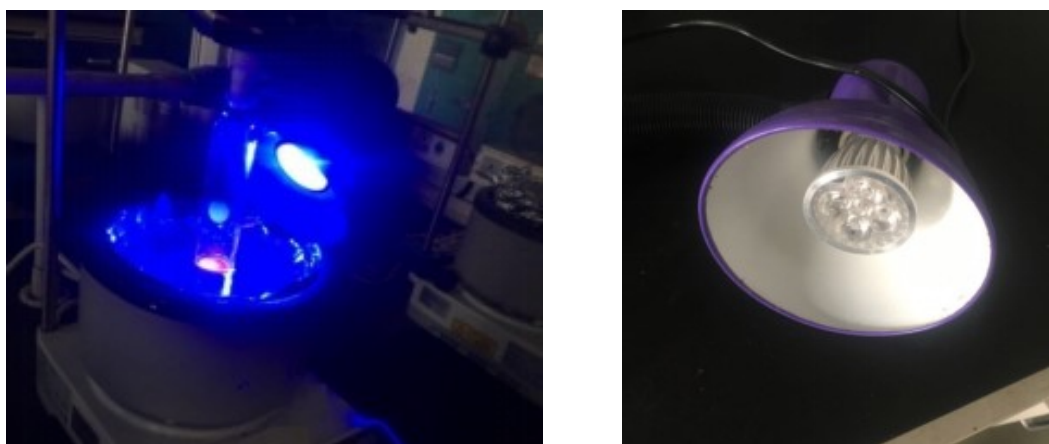

Figure S1. Pictures of Visible-Light Source.

### 2.3. Table S1: Screening of optimal *O*-benzoic acyl oxime <sup>a</sup>

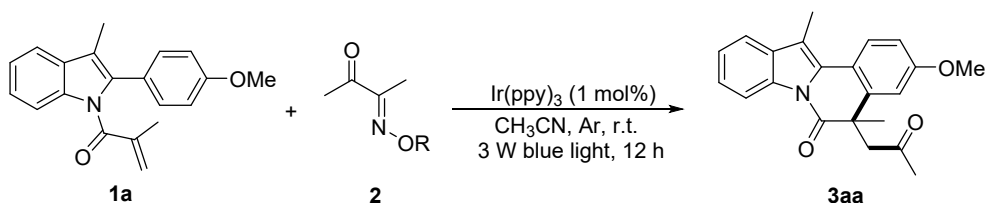

**2a**, R = *p*-CF<sub>3</sub>C<sub>6</sub>H<sub>4</sub>CO  
**2a-1** R = 4-FC<sub>6</sub>H<sub>4</sub>CO  
**2a-2** R = 4-NO<sub>2</sub>C<sub>6</sub>H<sub>4</sub>CO  
**2a-3** R = 4-OMeC<sub>6</sub>H<sub>4</sub>CO

**2a-4**, R = C<sub>6</sub>F<sub>5</sub>CO  
**2a-5**, R = C<sub>6</sub>H<sub>5</sub>CO  
**2a-6**, R = CF<sub>3</sub>CO

entry

variation from the standard conditions

yield (%)<sup>b</sup>

|                |                                  |    |
|----------------|----------------------------------|----|
| 1              | <b>2a</b>                        | 93 |
| 2 <sup>c</sup> | <b>2a-1</b> instead of <b>2a</b> | 82 |
| 3              | <b>2a-2</b> instead of <b>2a</b> | 76 |
| 4              | <b>2a-3</b> instead of <b>2a</b> | 63 |
| 5              | <b>2a-4</b> instead of <b>2a</b> | 71 |
| 6              | <b>2a-5</b> instead of <b>2a</b> | 62 |
| 7 <sup>c</sup> | <b>2a-6</b> instead of <b>2a</b> | 72 |

<sup>a</sup> Reaction conditions: **1a** (0.2 mmol), **2a** (0.3 mmol, 1.5 equiv), Ir(ppy)<sub>3</sub> (1 mol%) and MeCN (2 mL) at 25 °C under irradiation of 3 W blue light for 12 h. <sup>b</sup> Isolated yield. <sup>c</sup> Most of starting materials were decomposed.

The results showed that the ester leaving groups had a significant impact on the reaction and none of these oxime esters gave better yield than that of *O*-4-CF<sub>3</sub>C<sub>6</sub>H<sub>4</sub>CO acyl oximes. Notably, *O*-acetic acyl oximes **2a-6** could undergo the acylation/cyclization and furnish the difunctional product **3aa** in 72% yield (entry 7).

## 2.4 Control Experiments.

### 2.4.1 Using TEMPO as Radical Inhibitor

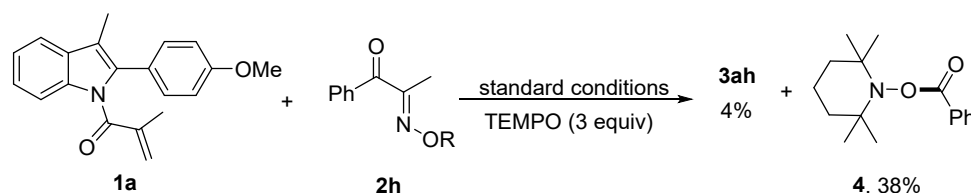

To a Schlenk tube were added 2-aryl indoles **1a** (0.2 mmol, 0.1 M), acyl oxime esters **2h** (0.3 mmol, 1.5 equiv), Ir(ppy)<sub>3</sub> (1mol%), TEMPO (3 equiv) and MeCN (2 mL) at room temperature under irradiation of 3 W blue light for 12 h. The GC-MS analysis of raw reaction mixture showed that only 4% yield of target product **3ah** was detected. Additionally, the Cyclohexan-trapping products **4** could be obtained in 38% yield.

### 2.4.2 Using BHT as Radical Inhibitor

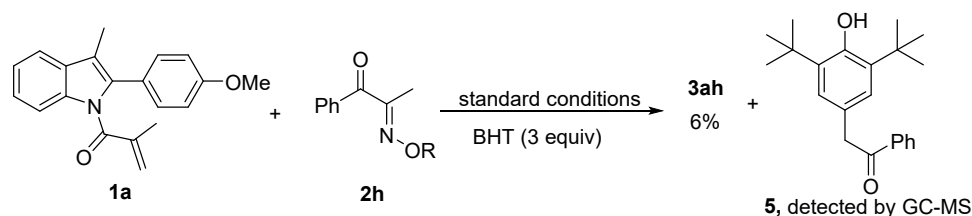

To a Schlenk tube were added 2-aryl indoles **1a** (0.2 mmol, 0.1 M), acyl oxime esters **2h** (0.3 mmol, 1.5 equiv), Ir(ppy)<sub>3</sub> (1mol %), BHT (3 equiv) and MeCN (2 mL) at room temperature under irradiation of 3 W blue light for 12 h. The GC-MS analysis of raw

reaction mixture showed that only 6% yield of target product **3ah** was detected. Additionally, the Cyclohexan-trapping products **5** could be detected by GC-MS analysis of raw reaction mixture.

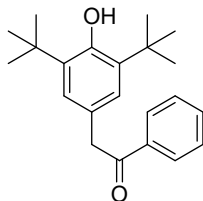

Chemical Formula: C<sub>22</sub>H<sub>28</sub>O<sub>2</sub>  
 Exact Mass: 324.20893  
 Molecular Weight: 324.46400

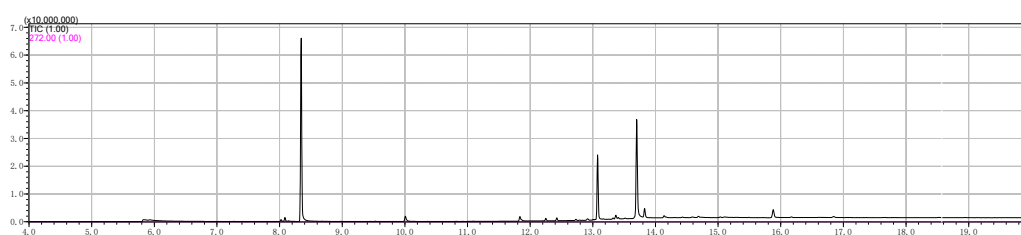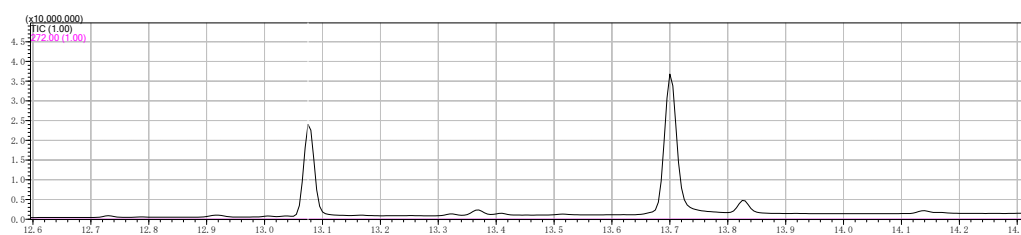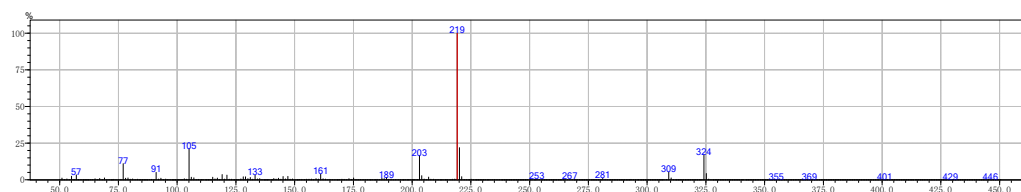

|                        |            |        |       |       |       |        |
|------------------------|------------|--------|-------|-------|-------|--------|
| [MS Spectrum]          | 52.05      | 12733  | 0.16  | 65.05 | 55123 | 0.68   |
| # of Peaks             | 401        | 53.05  | 50466 | 0.62  | 66.05 | 9703   |
| Raw Spectrum           | 13.075     | 54.15  | 4698  | 0.06  | 67.05 | 70010  |
| (scan : 1816)          | 55.05      | 199361 | 2.45  | 68.10 | 5300  | 0.07   |
| Background             | No         | 56.10  | 20294 | 0.25  | 69.05 | 103757 |
| Background Spectrum    | 57.10      | 264783 | 3.26  | 70.05 | 6852  | 0.08   |
| Base Peak              | m/z 219.15 | 58.05  | 14683 | 0.18  | 71.05 | 4358   |
| (Inten : 8,126,740)    | 59.05      | 14466  | 0.18  | 72.00 | 2258  | 0.03   |
| Event#                 | 1          | 60.05  | 977   | 0.01  | 73.00 | 21858  |
| m/z Absolute Intensity | 61.00      | 1258   | 0.02  | 74.00 | 5228  | 0.06   |
| Relative Intensity     | 61.95      | 1411   | 0.02  | 75.00 | 9017  | 0.11   |
| 50.00                  | 13796      | 0.17   | 63.00 | 10023 | 0.12  | 76.05  |
| 51.00                  | 94302      | 1.16   | 64.00 | 6967  | 0.09  | 77.05  |
|                        |            |        |       |       |       | 894066 |
|                        |            |        |       |       |       | 11.00  |

|        |         |       |        |        |      |        |         |       |
|--------|---------|-------|--------|--------|------|--------|---------|-------|
| 78.05  | 84419   | 1.04  | 122.15 | 28168  | 0.35 | 166.05 | 8871    | 0.11  |
| 79.05  | 101254  | 1.25  | 123.15 | 30532  | 0.38 | 167.10 | 8065    | 0.10  |
| 80.05  | 28385   | 0.35  | 124.20 | 3406   | 0.04 | 168.10 | 2865    | 0.04  |
| 81.05  | 50667   | 0.62  | 125.15 | 2848   | 0.04 | 169.10 | 7657    | 0.09  |
| 82.10  | 7430    | 0.09  | 126.15 | 4566   | 0.06 | 170.10 | 33054   | 0.41  |
| 83.10  | 32425   | 0.40  | 127.10 | 46895  | 0.58 | 171.05 | 23321   | 0.29  |
| 84.05  | 2467    | 0.03  | 128.10 | 165895 | 2.04 | 172.10 | 7532    | 0.09  |
| 85.05  | 2406    | 0.03  | 129.10 | 167007 | 2.06 | 173.10 | 63905   | 0.79  |
| 86.05  | 1420    | 0.02  | 130.10 | 61473  | 0.76 | 174.10 | 21740   | 0.27  |
| 87.05  | 3128    | 0.04  | 131.10 | 128266 | 1.58 | 175.10 | 101194  | 1.25  |
| 88.15  | 4188    | 0.05  | 132.15 | 27698  | 0.34 | 176.10 | 18844   | 0.23  |
| 89.10  | 19870   | 0.24  | 133.15 | 251306 | 3.09 | 177.05 | 10279   | 0.13  |
| 90.15  | 8122    | 0.10  | 134.15 | 46999  | 0.58 | 178.05 | 18149   | 0.22  |
| 91.05  | 409645  | 5.04  | 135.15 | 65403  | 0.80 | 179.10 | 15684   | 0.19  |
| 92.05  | 41218   | 0.51  | 136.10 | 7556   | 0.09 | 180.05 | 4908    | 0.06  |
| 93.10  | 84231   | 1.04  | 137.10 | 3278   | 0.04 | 181.05 | 9719    | 0.12  |
| 94.10  | 17662   | 0.22  | 138.15 | 520    | 0.01 | 182.05 | 2867    | 0.04  |
| 95.10  | 38830   | 0.48  | 139.05 | 5238   | 0.06 | 183.05 | 5733    | 0.07  |
| 96.05  | 19005   | 0.23  | 140.15 | 2916   | 0.04 | 184.05 | 1939    | 0.02  |
| 97.05  | 11163   | 0.14  | 141.10 | 69783  | 0.86 | 185.10 | 21452   | 0.26  |
| 98.00  | 1108    | 0.01  | 142.10 | 42786  | 0.53 | 186.15 | 5623    | 0.07  |
| 99.00  | 918     | 0.01  | 143.10 | 82852  | 1.02 | 187.10 | 83794   | 1.03  |
| 100.15 | 776     | 0.01  | 144.10 | 34138  | 0.42 | 188.10 | 65183   | 0.80  |
| 101.15 | 4989    | 0.06  | 145.10 | 179671 | 2.21 | 189.10 | 127622  | 1.57  |
| 102.05 | 14124   | 0.17  | 146.10 | 45359  | 0.56 | 190.05 | 21846   | 0.27  |
| 103.05 | 51307   | 0.63  | 147.10 | 186410 | 2.29 | 191.00 | 30010   | 0.37  |
| 104.05 | 29386   | 0.36  | 148.10 | 30198  | 0.37 | 192.05 | 10650   | 0.13  |
| 105.05 | 1719710 | 21.16 | 149.10 | 45572  | 0.56 | 193.00 | 15473   | 0.19  |
| 106.05 | 142412  | 1.75  | 150.10 | 5554   | 0.07 | 194.05 | 6178    | 0.08  |
| 107.10 | 109340  | 1.35  | 151.05 | 3886   | 0.05 | 195.05 | 6364    | 0.08  |
| 108.10 | 13262   | 0.16  | 152.10 | 14982  | 0.18 | 196.05 | 1840    | 0.02  |
| 109.10 | 26700   | 0.33  | 153.05 | 22596  | 0.28 | 197.05 | 7930    | 0.10  |
| 110.15 | 3674    | 0.05  | 154.10 | 12855  | 0.16 | 198.05 | 1155    | 0.01  |
| 111.05 | 3950    | 0.05  | 155.10 | 33668  | 0.41 | 199.10 | 4364    | 0.05  |
| 112.15 | 764     | 0.01  | 156.10 | 31092  | 0.38 | 200.05 | 2210    | 0.03  |
| 113.15 | 1575    | 0.02  | 157.10 | 38057  | 0.47 | 201.10 | 6041    | 0.07  |
| 114.15 | 2521    | 0.03  | 158.10 | 15202  | 0.19 | 202.15 | 16303   | 0.20  |
| 115.10 | 139967  | 1.72  | 159.10 | 61177  | 0.75 | 203.10 | 1341182 | 16.50 |
| 116.10 | 47463   | 0.58  | 160.10 | 35369  | 0.44 | 204.10 | 230124  | 2.83  |
| 117.10 | 97487   | 1.20  | 161.10 | 306918 | 3.78 | 205.10 | 35722   | 0.44  |
| 118.15 | 21576   | 0.27  | 162.10 | 56060  | 0.69 | 206.05 | 8071    | 0.10  |
| 119.15 | 290527  | 3.57  | 163.10 | 39820  | 0.49 | 207.00 | 151044  | 1.86  |
| 120.15 | 41763   | 0.51  | 164.10 | 5850   | 0.07 | 208.00 | 33476   | 0.41  |
| 121.15 | 258600  | 3.18  | 165.05 | 23411  | 0.29 | 209.05 | 34939   | 0.43  |

|        |         |        |        |       |      |               |                |              |
|--------|---------|--------|--------|-------|------|---------------|----------------|--------------|
| 210.05 | 7257    | 0.09   | 254.10 | 6305  | 0.08 | 298.20        | 102            | 0.00         |
| 211.05 | 4571    | 0.06   | 255.10 | 1009  | 0.01 | 299.20        | 16             | 0.00         |
| 212.05 | 1530    | 0.02   | 256.10 | 239   | 0.00 | 300.20        | 2              | 0.00         |
| 213.10 | 6738    | 0.08   | 257.00 | 519   | 0.01 | 301.20        | 113            | 0.00         |
| 214.10 | 1294    | 0.02   | 258.15 | 903   | 0.01 | 302.20        | 34             | 0.00         |
| 215.10 | 8442    | 0.10   | 259.15 | 688   | 0.01 | 303.20        | 76             | 0.00         |
| 216.10 | 5210    | 0.06   | 260.10 | 550   | 0.01 | 304.20        | 49             | 0.00         |
| 217.10 | 34148   | 0.42   | 261.10 | 743   | 0.01 | 305.20        | 271            | 0.00         |
| 218.15 | 38402   | 0.47   | 262.15 | 571   | 0.01 | 306.20        | 801            | 0.01         |
| 219.15 | 8126740 | 100.00 | 263.10 | 1593  | 0.02 | 307.15        | 5745           | 0.07         |
| 220.15 | 1778861 | 21.89  | 264.15 | 1148  | 0.01 | 308.25        | 14035          | 0.17         |
| 221.10 | 176478  | 2.17   | 265.10 | 18254 | 0.22 | 309.20        | 420929         | 5.18         |
| 222.15 | 15442   | 0.19   | 266.10 | 10647 | 0.13 | 310.20        | 99578          | 1.23         |
| 223.10 | 10466   | 0.13   | 267.10 | 22057 | 0.27 | 311.20        | 12151          | 0.15         |
| 224.10 | 2484    | 0.03   | 268.10 | 6268  | 0.08 | 312.20        | 1278           | 0.02         |
| 225.10 | 33041   | 0.41   | 269.00 | 2930  | 0.04 | 313.20        | 52             | 0.00         |
| 226.10 | 6206    | 0.08   | 270.00 | 660   | 0.01 | 314.20        | 108            | 0.00         |
| 227.05 | 1373    | 0.02   | 271.10 | 338   | 0.00 | 315.20        | 33             | 0.00         |
| 228.05 | 1630    | 0.02   | 272.10 | 145   | 0.00 | 316.20        | 14             | 0.00         |
| 229.05 | 2924    | 0.04   | 273.10 | 343   | 0.00 | 317.20        | 55             | 0.00         |
| 230.15 | 1584    | 0.02   | 274.10 | 116   | 0.00 | 318.20        | 132            | 0.00         |
| 231.15 | 6791    | 0.08   | 275.10 | 1022  | 0.01 | 319.20        | 130            | 0.00         |
| 232.05 | 3073    | 0.04   | 276.25 | 259   | 0.00 | 320.20        | 108            | 0.00         |
| 233.10 | 9295    | 0.11   | 277.15 | 1207  | 0.01 | 321.15        | 1051           | 0.01         |
| 234.10 | 6631    | 0.08   | 278.10 | 398   | 0.00 | 322.20        | 3695           | 0.05         |
| 235.10 | 19441   | 0.24   | 279.15 | 2468  | 0.03 | <b>323.25</b> | <b>6987</b>    | <b>0.09</b>  |
| 236.10 | 4458    | 0.05   | 280.15 | 1220  | 0.02 | <b>324.20</b> | <b>1391135</b> | <b>17.12</b> |
| 237.10 | 7116    | 0.09   | 281.10 | 79183 | 0.97 | <b>325.20</b> | <b>345222</b>  | <b>4.25</b>  |
| 238.10 | 1710    | 0.02   | 282.10 | 20060 | 0.25 | <b>326.20</b> | <b>41100</b>   | <b>0.51</b>  |
| 239.10 | 3199    | 0.04   | 283.05 | 10439 | 0.13 | 327.15        | 5861           | 0.07         |
| 240.05 | 738     | 0.01   | 284.10 | 2190  | 0.03 | 328.05        | 896            | 0.01         |
| 241.15 | 924     | 0.01   | 285.05 | 611   | 0.01 | 329.10        | 306            | 0.00         |
| 242.05 | 668     | 0.01   | 286.10 | 132   | 0.00 | 330.10        | 134            | 0.00         |
| 243.15 | 1824    | 0.02   | 287.10 | 134   | 0.00 | 331.10        | 106            | 0.00         |
| 244.15 | 1267    | 0.02   | 288.10 | 60    | 0.00 | 332.10        | 22             | 0.00         |
| 245.10 | 1798    | 0.02   | 289.10 | 490   | 0.01 | 333.10        | 63             | 0.00         |
| 246.05 | 745     | 0.01   | 290.10 | 105   | 0.00 | 334.10        | 57             | 0.00         |
| 247.05 | 1453    | 0.02   | 291.15 | 2856  | 0.04 | 335.10        | 52             | 0.00         |
| 248.05 | 1343    | 0.02   | 292.20 | 722   | 0.01 | 336.10        | 111            | 0.00         |
| 249.05 | 10392   | 0.13   | 293.15 | 21595 | 0.27 | 337.10        | 308            | 0.00         |
| 250.05 | 3632    | 0.04   | 294.15 | 5133  | 0.06 | 338.10        | 100            | 0.00         |
| 251.05 | 8335    | 0.10   | 295.15 | 5004  | 0.06 | 338.95        | 467            | 0.01         |
| 252.05 | 3144    | 0.04   | 296.05 | 1501  | 0.02 | 340.15        | 233            | 0.00         |
| 253.10 | 33044   | 0.41   | 297.20 | 364   | 0.00 | 341.05        | 3990           | 0.05         |

|        |      |      |        |     |      |        |      |      |
|--------|------|------|--------|-----|------|--------|------|------|
| 342.10 | 1708 | 0.02 | 348.00 | 31  | 0.00 | 354.10 | 188  | 0.00 |
| 343.00 | 1068 | 0.01 | 349.00 | 78  | 0.00 | 355.05 | 7521 | 0.09 |
| 344.00 | 201  | 0.00 | 350.00 | 73  | 0.00 | 356.10 | 2646 | 0.03 |
| 345.00 | 170  | 0.00 | 351.00 | 183 | 0.00 | 357.10 | 1897 | 0.02 |
| 346.00 | 76   | 0.00 | 352.00 | 52  | 0.00 |        |      |      |
| 347.00 | 81   | 0.00 | 353.00 | 140 | 0.00 |        |      |      |

### 2.4.3 Using 1,1-diphenylethene as Radical Inhibitor

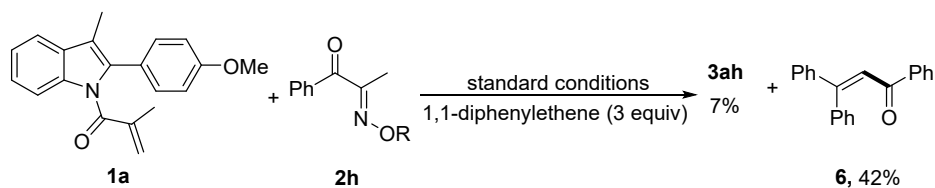

To a Schlenk tube were added 2-aryl indoles **1h** (0.2 mmol, 0.1 M), acyl oxime esters **2h** (0.3 mmol, 1.5 equiv), Ir(ppy)<sub>3</sub> (1mol%), 1,1-diphenylethene (3 equiv) and MeCN (2 mL) at room temperature under irradiation of 3 W blue light for 12 h. The GC-MS analysis of raw reaction mixture showed that onyl 7% yield of target product **3ah** was detected. The benzoyl-trapping products **6** could be obtained in 42% yield.

### 3. References

- [1] Y.-L. Wei, J.-Q. Chen, B. Sun, P.-F. Xu, *Chem. Commun.* 2019, **55**, 5922.
- [2] P. Chen, J. Xie, Z. Chen, B.-Q. Xiong, Y. Liu, C.-A. Yang and K.-W. Tang, *Adv. Synth. Catal.*, 2021, **363**, 4440.
- [3] X. Fan, T. Lei, B. Chen, C.-H. Tung and L.-Z. Wu, *Org. Lett.*, 2019, **21**, 4153.



## 4. Spectra

### 3-Methoxy-5,12-dimethyl-5-(2-oxopropyl)indolo[2,1-*a*]isoquinolin-6(5*H*)-one (3aa)

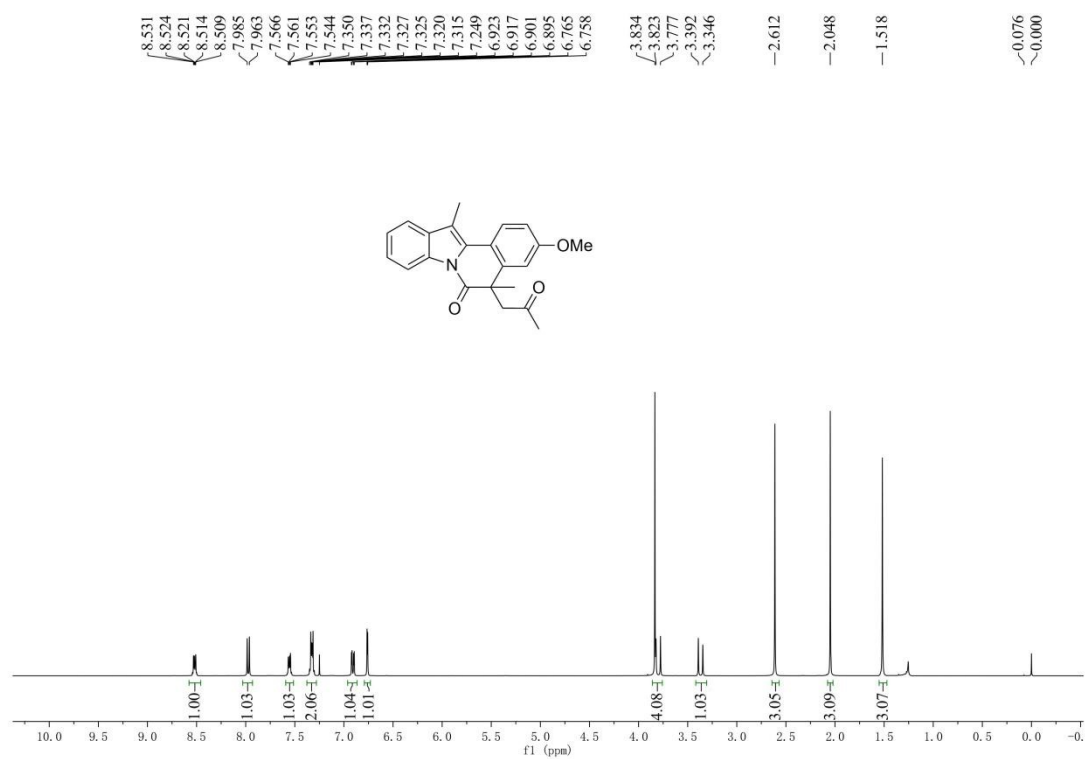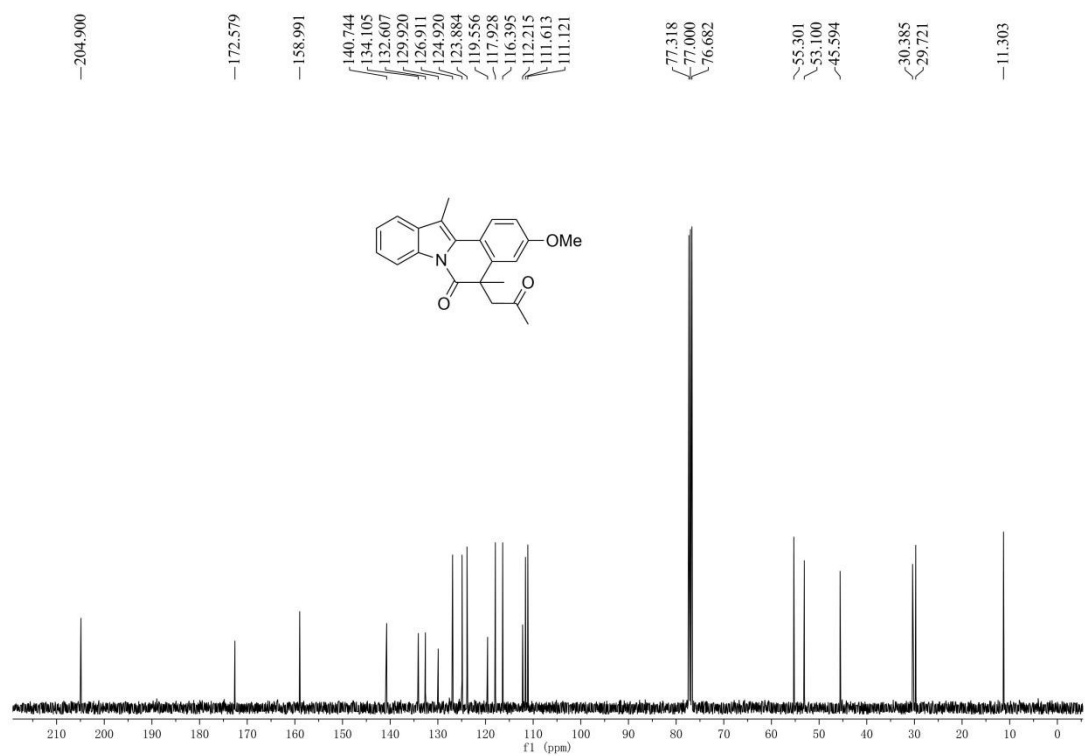

### 3,5,12-Trimethyl-5-(2-oxopropyl)indolo[2,1-a]isoquinolin-6(5H)-one (3ba)

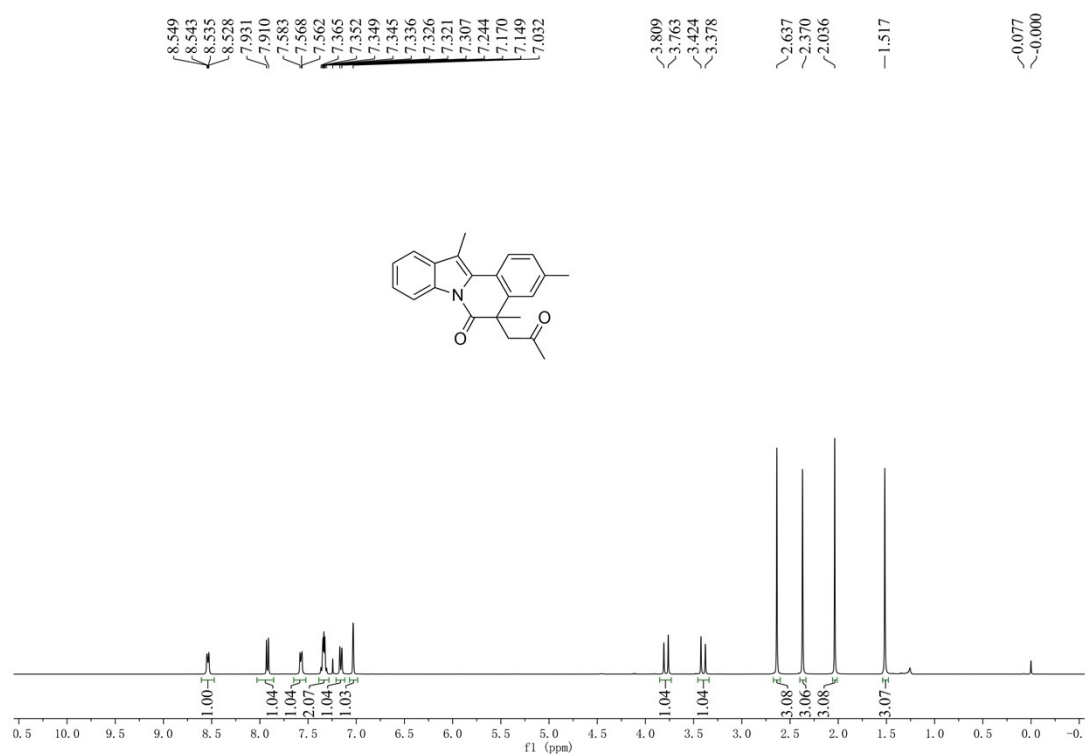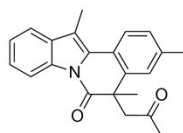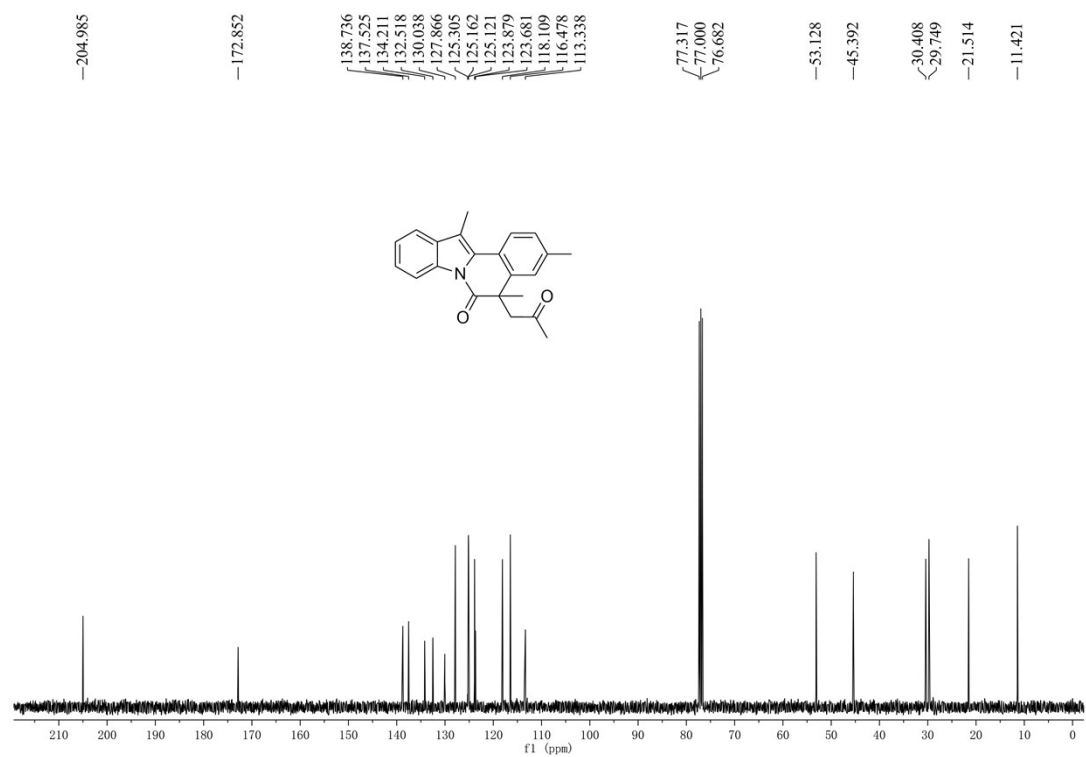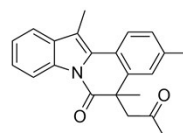

### 5,12-Dimethyl-5-(2-oxopropyl)indolo[2,1-a]isoquinolin-6(5H)-one (3ca)

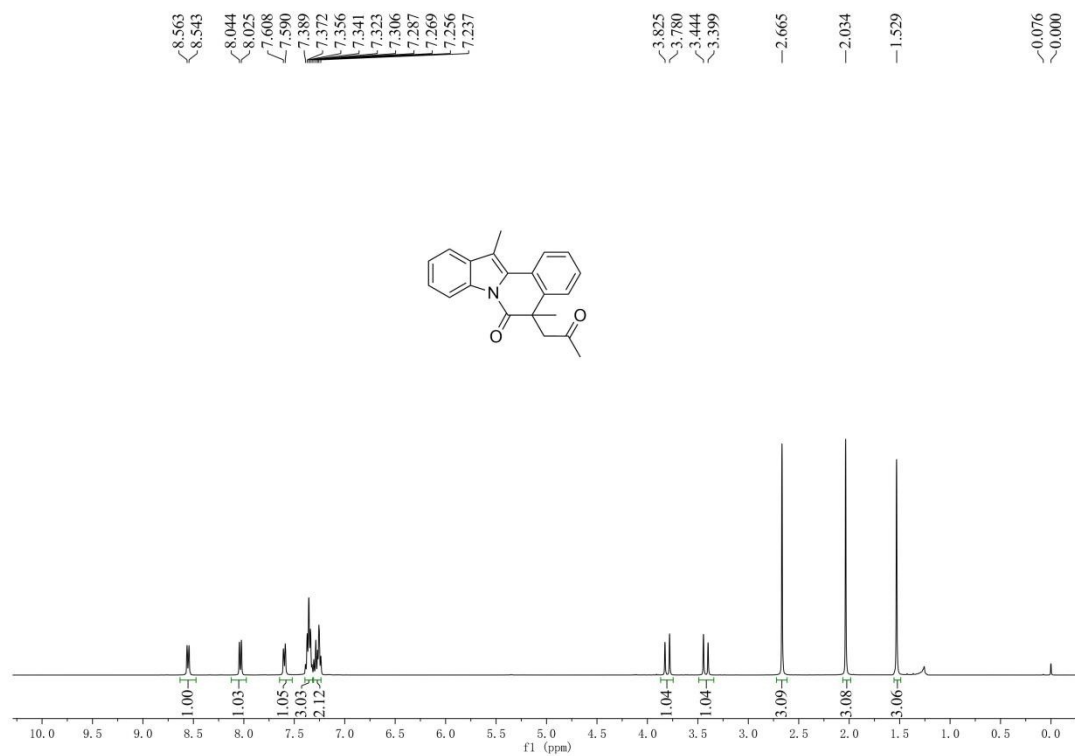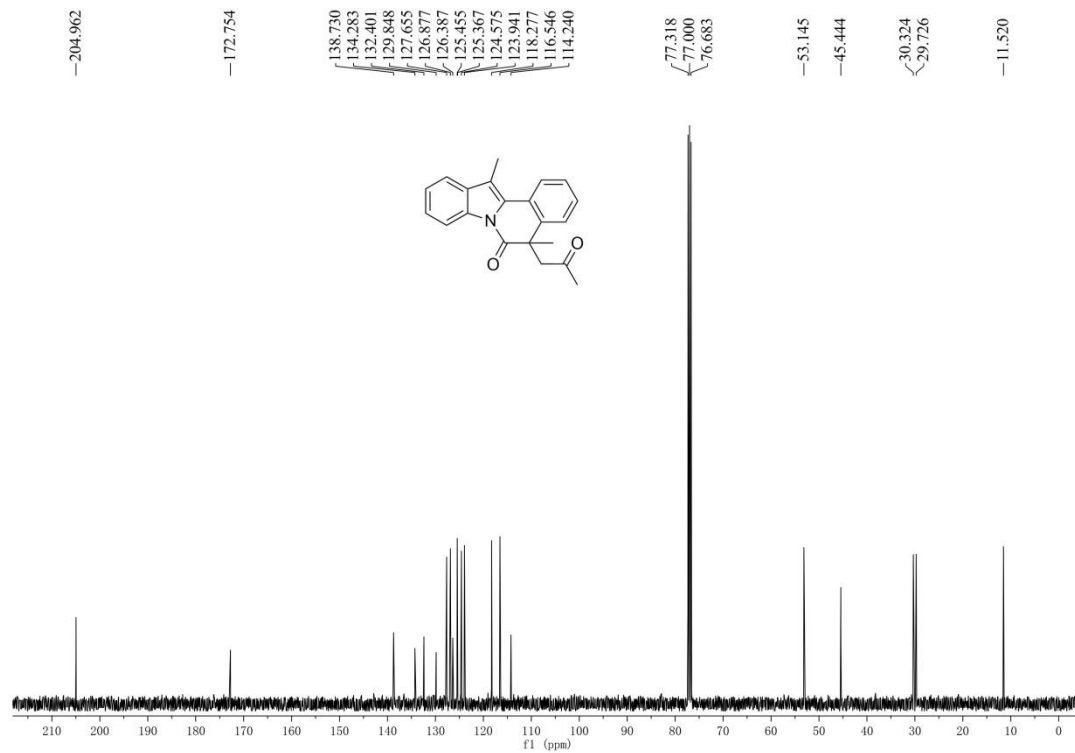

### 3-Fluoro-5,12-dimethyl-5-(2-oxopropyl)indolo[2,1-a]isoquinolin-6(5H)-one (3da)

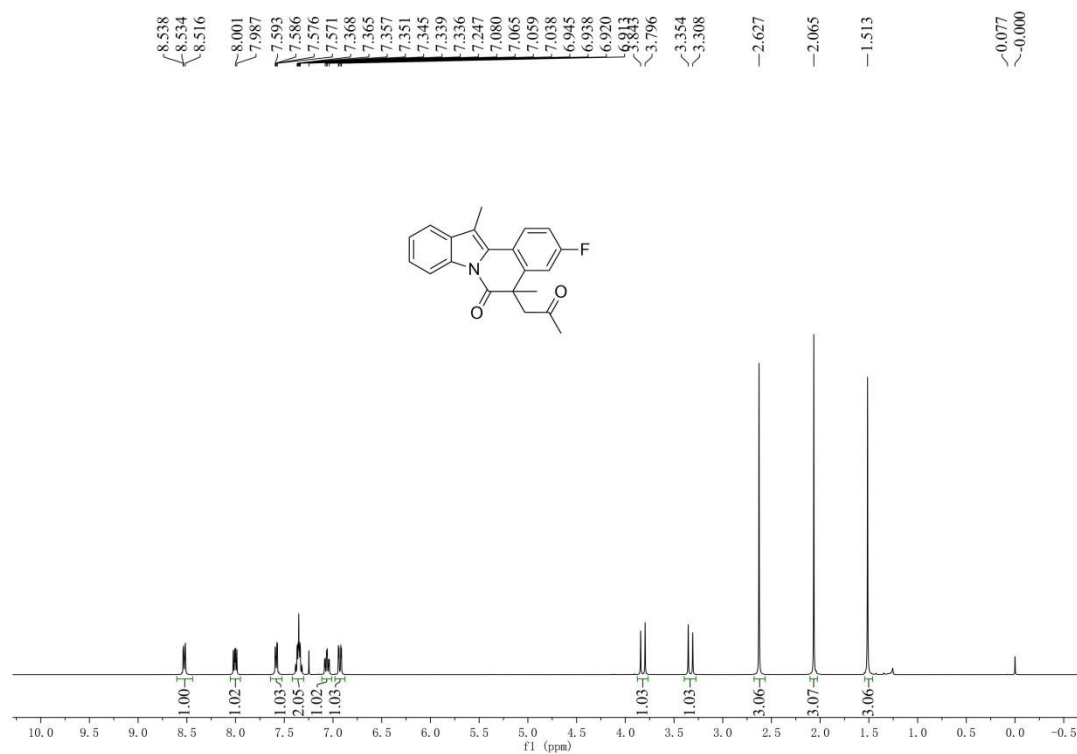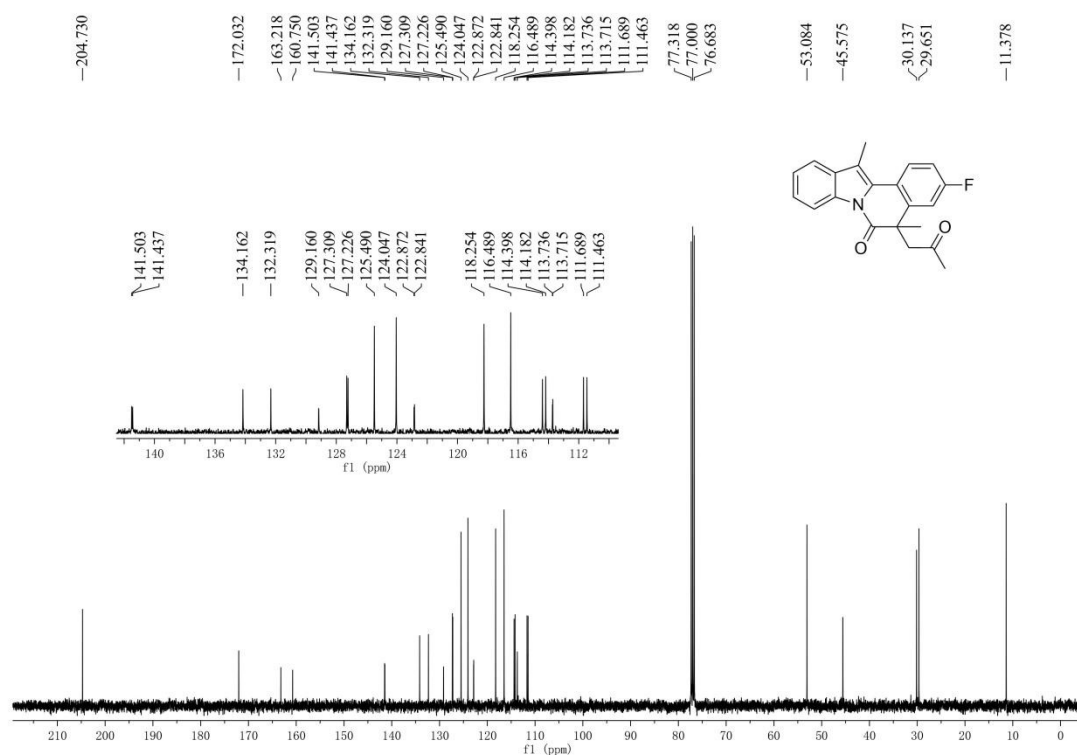

--112.672

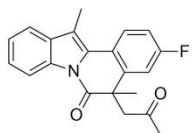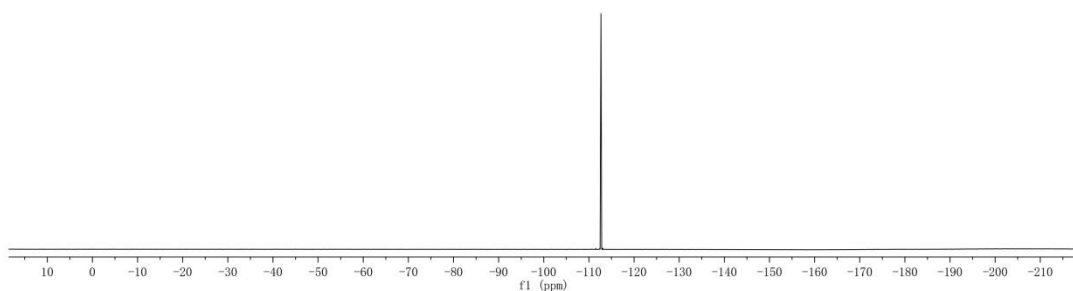

### 3-Chloro-5,12-dimethyl-5-(2-oxopropyl)indolo[2,1-a]isoquinolin-6(5H)-one (3ea)

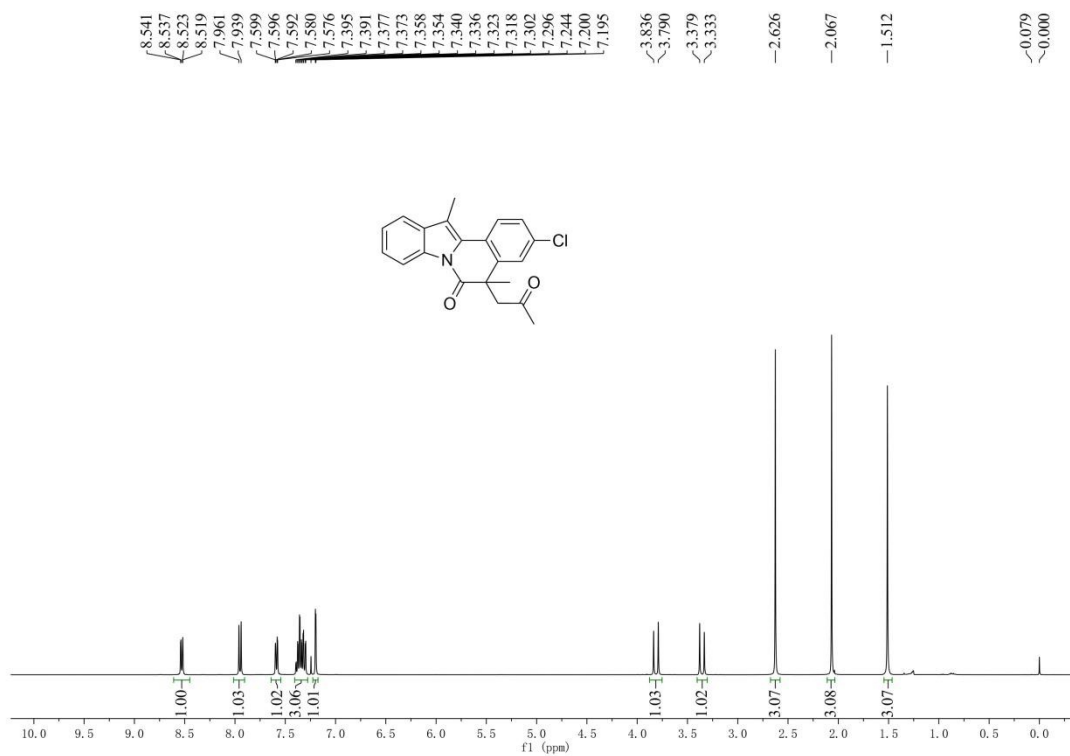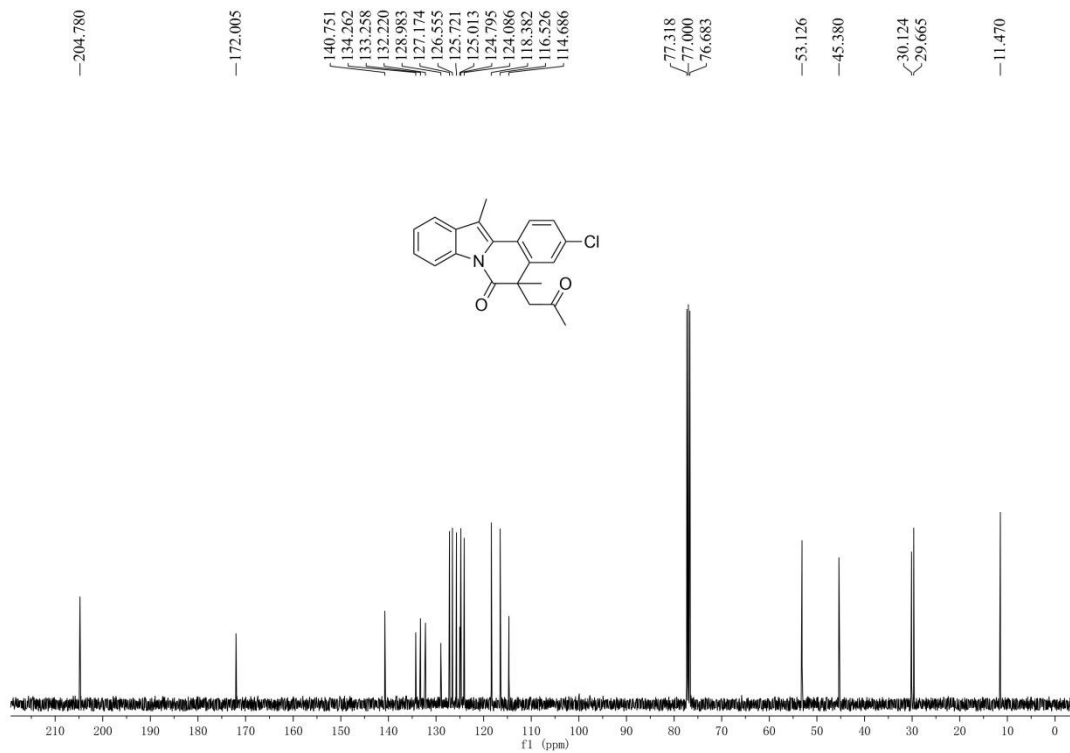

### 3-Bromo-5,12-dimethyl-5-(2-oxopropyl)indolo[2,1-a]isoquinolin-6(5H)-one (3fa)

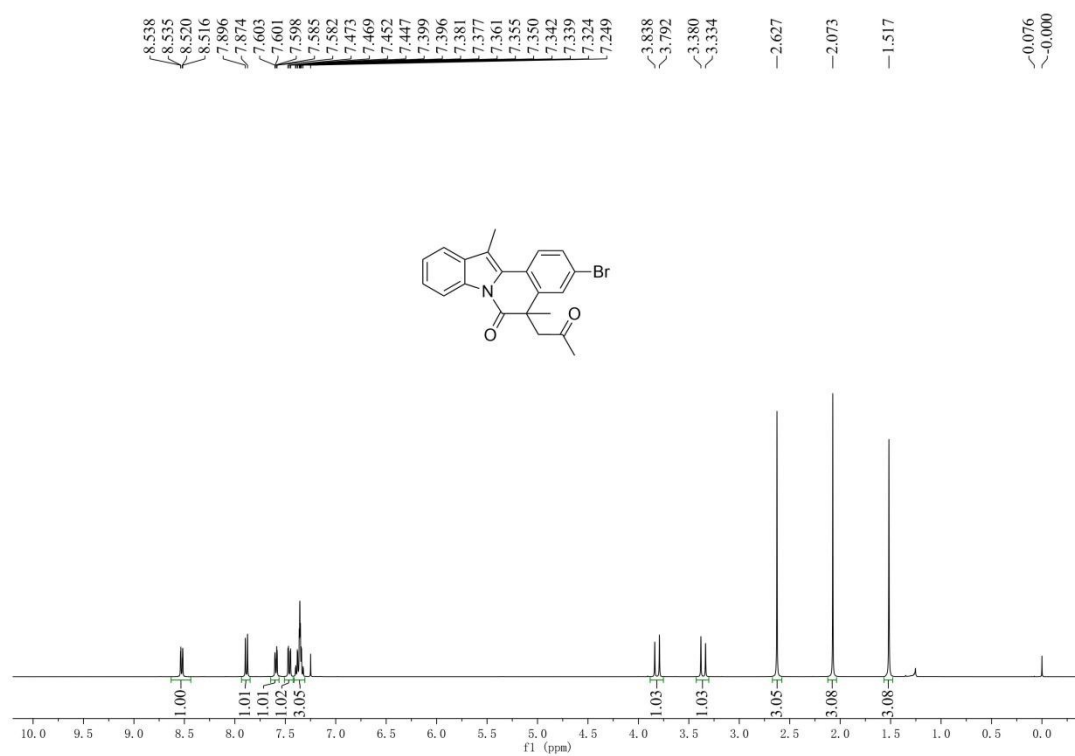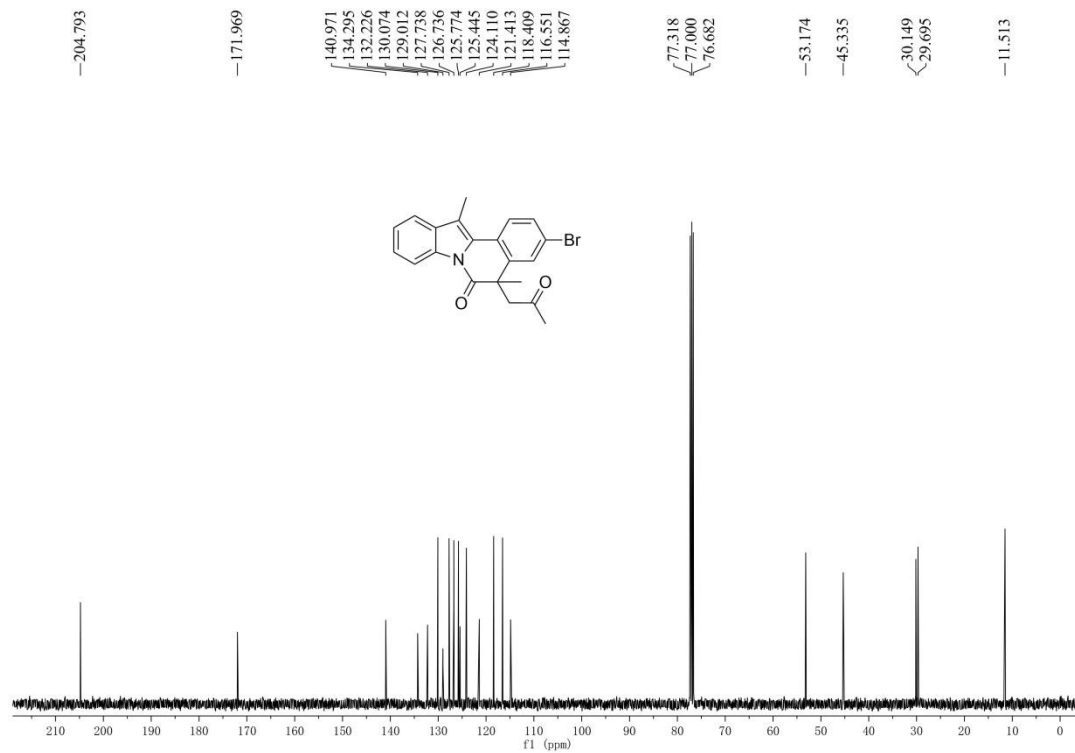

**2,5,12-Trimethyl-5-(2-oxopropyl)indolo[2,1-*a*]isoquinolin-6(5*H*)-one (3ga) and  
4,5,12-Trimethyl-5-(2-oxopropyl)indolo[2,1-*a*]isoquinolin-6(5*H*)-one (3ga')**

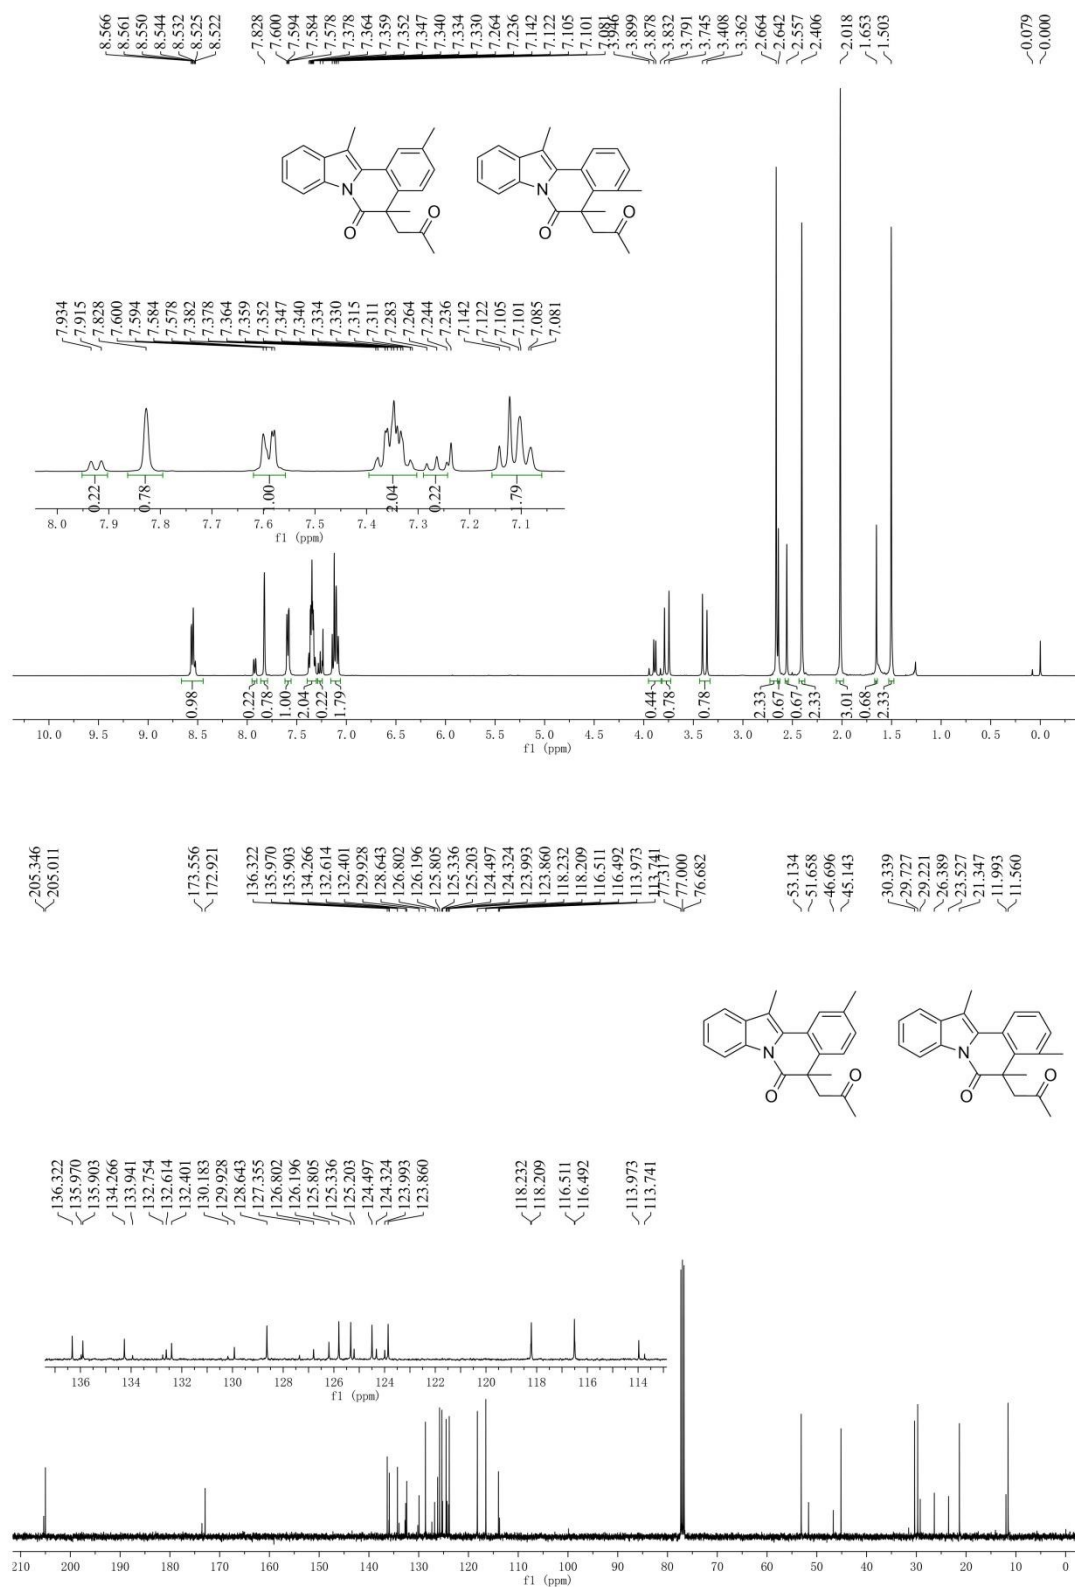



# 4,11-Dimethyl-4-(2-oxopropyl)thieno[2',3':3,4]pyrido[1,2-*a*]indol-5(4*H*)-one (3ha)

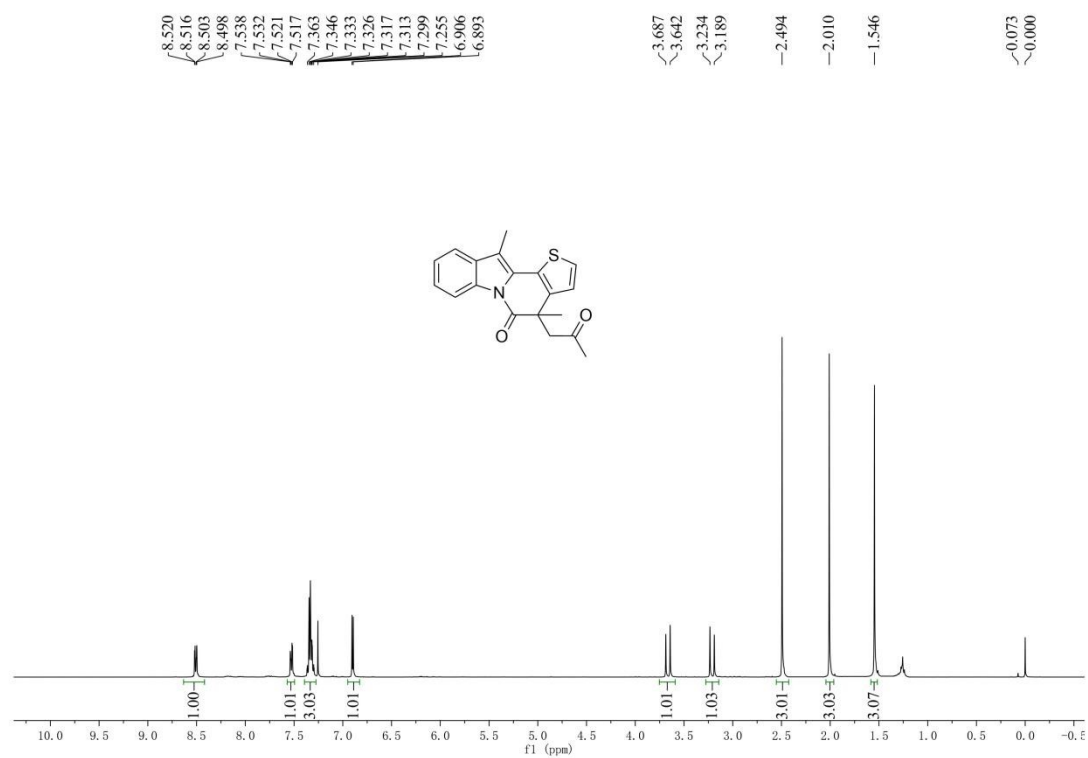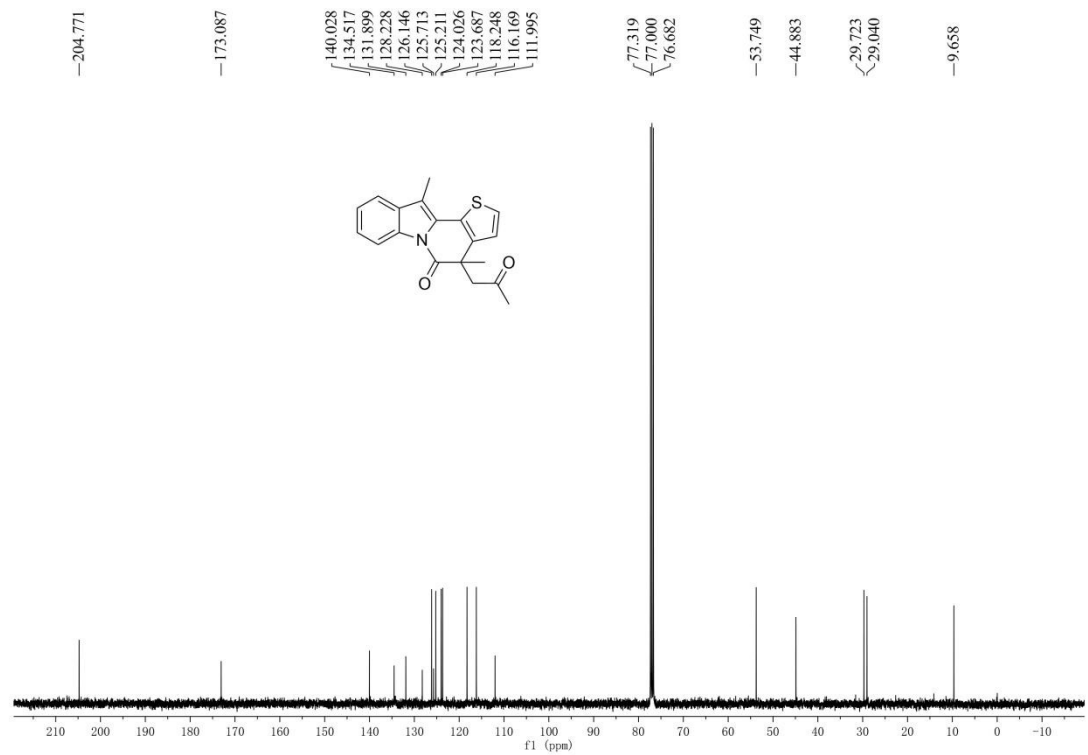

**5-Benzyl-3-methoxy-12-methyl-5-(2-oxopropyl)indolo[2,1-*a*]isoquinolin-6(5*H*)-one (3ia)**

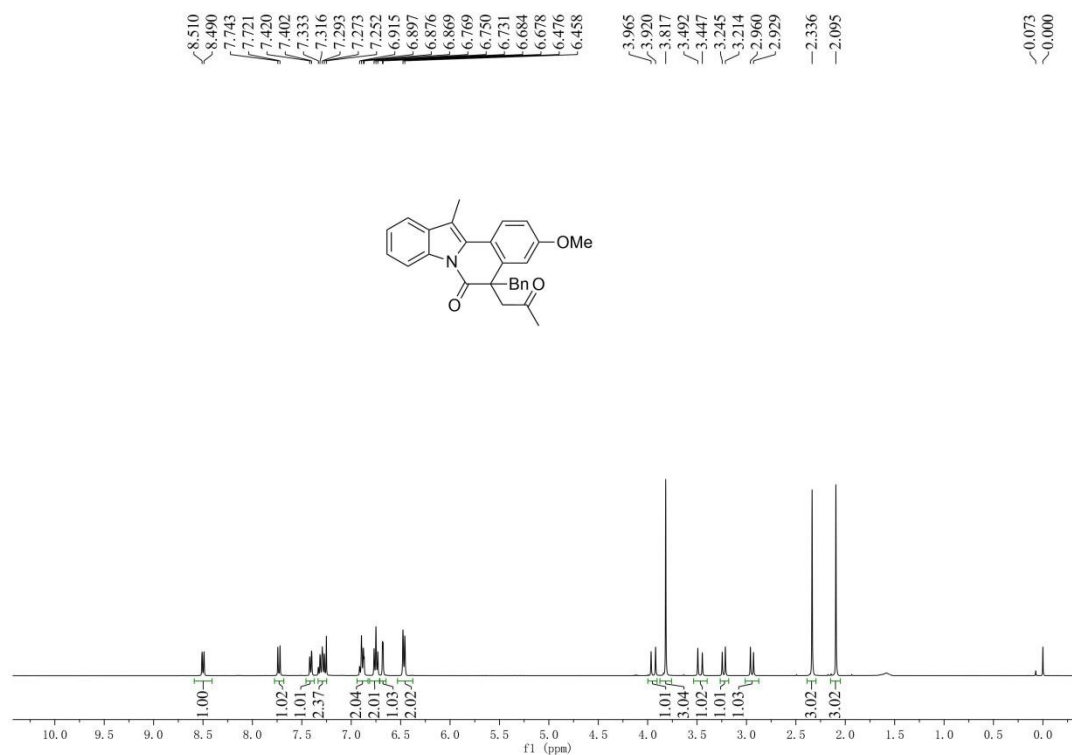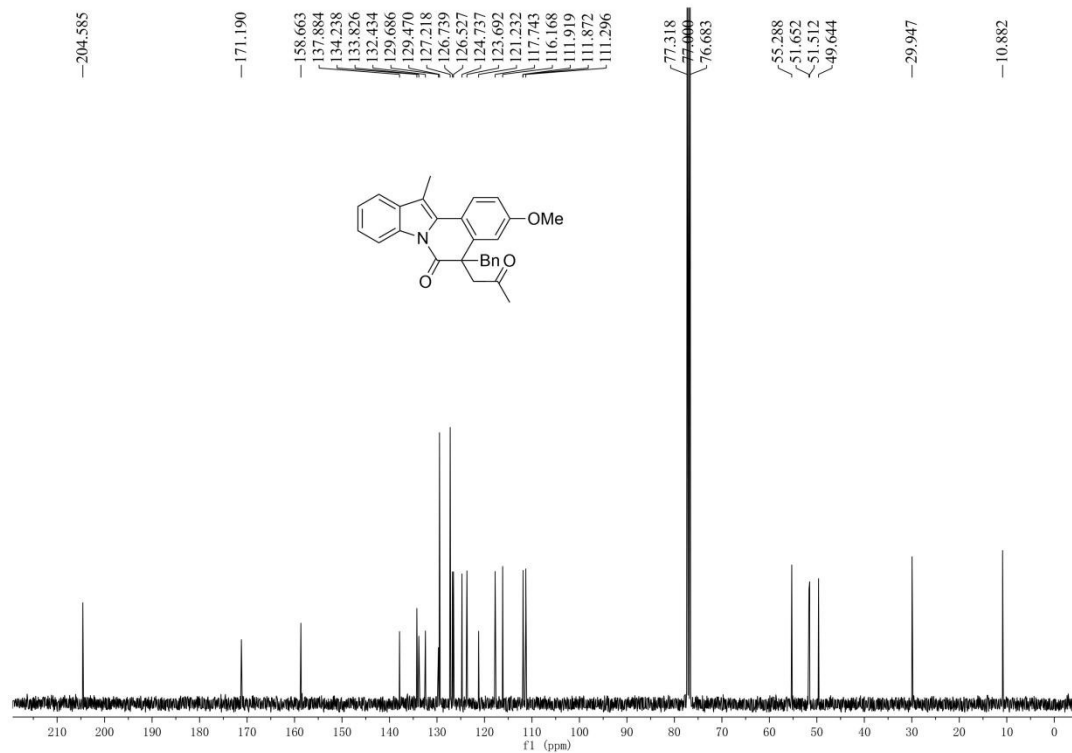

**3-Methoxy-12-methyl-5-(2-oxopropyl)-5-phenylindolo[2,1-*a*]isoquinolin-6(5*H*)-one (3ja)**

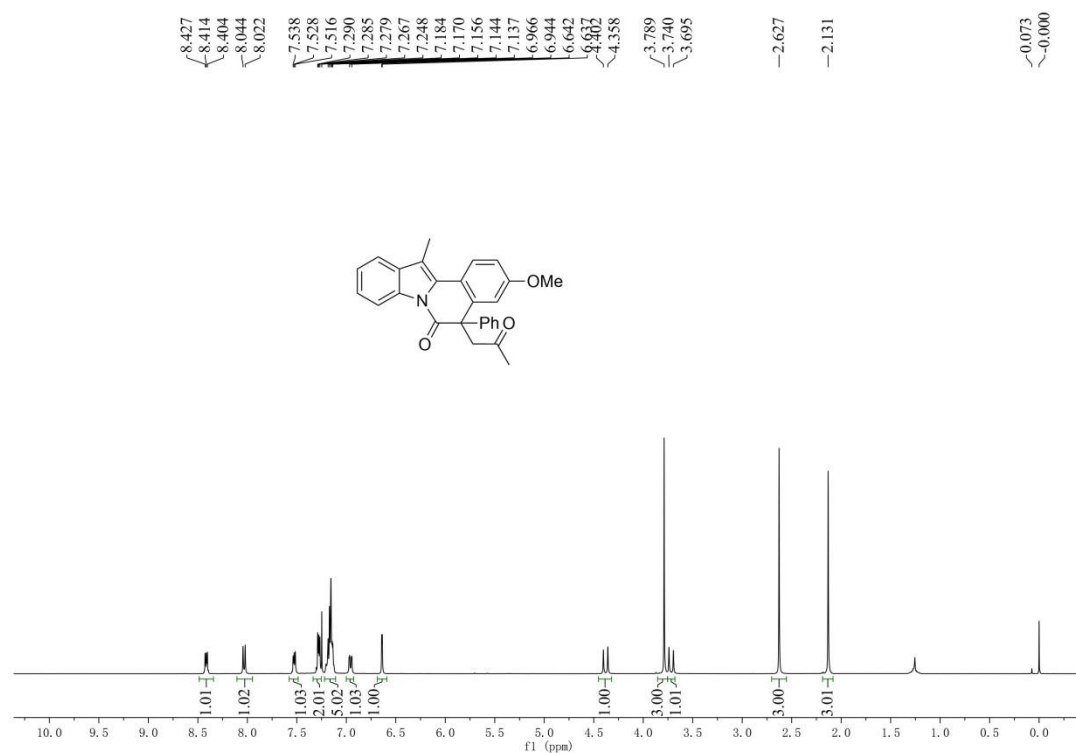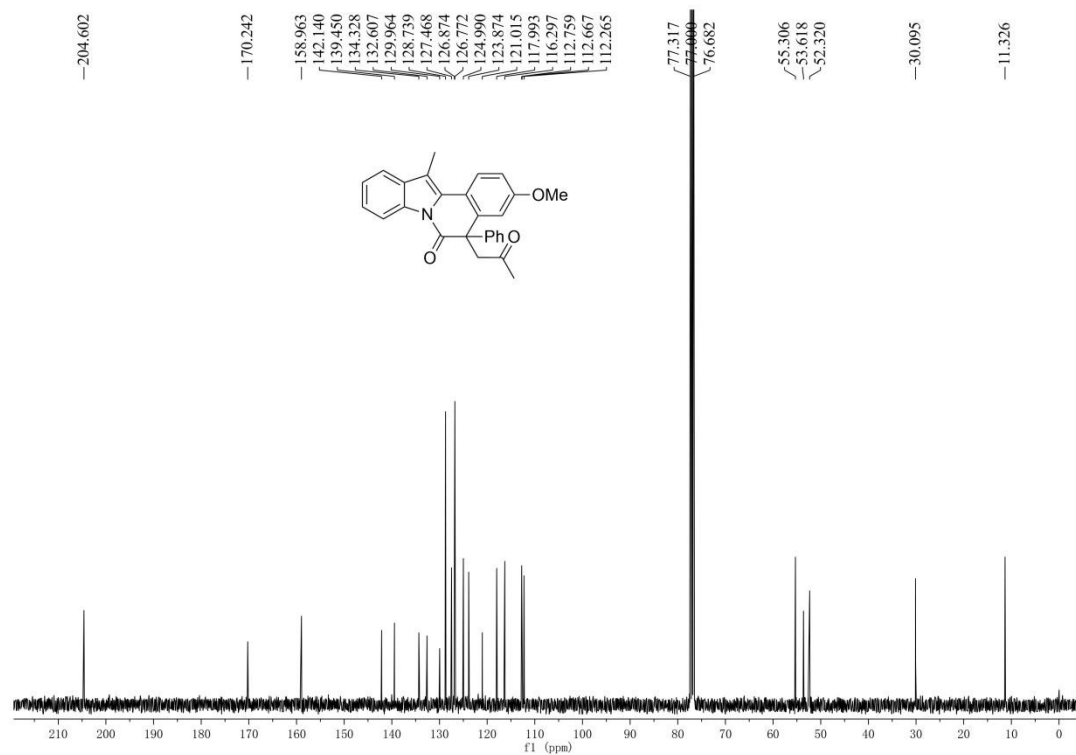

**Methyl 3-methoxy-12-methyl-6-oxo-5-(2-oxopropyl)-5,6-dihydroindolo[2,1-a]isoquinoline-5-carboxylate (3ka)**

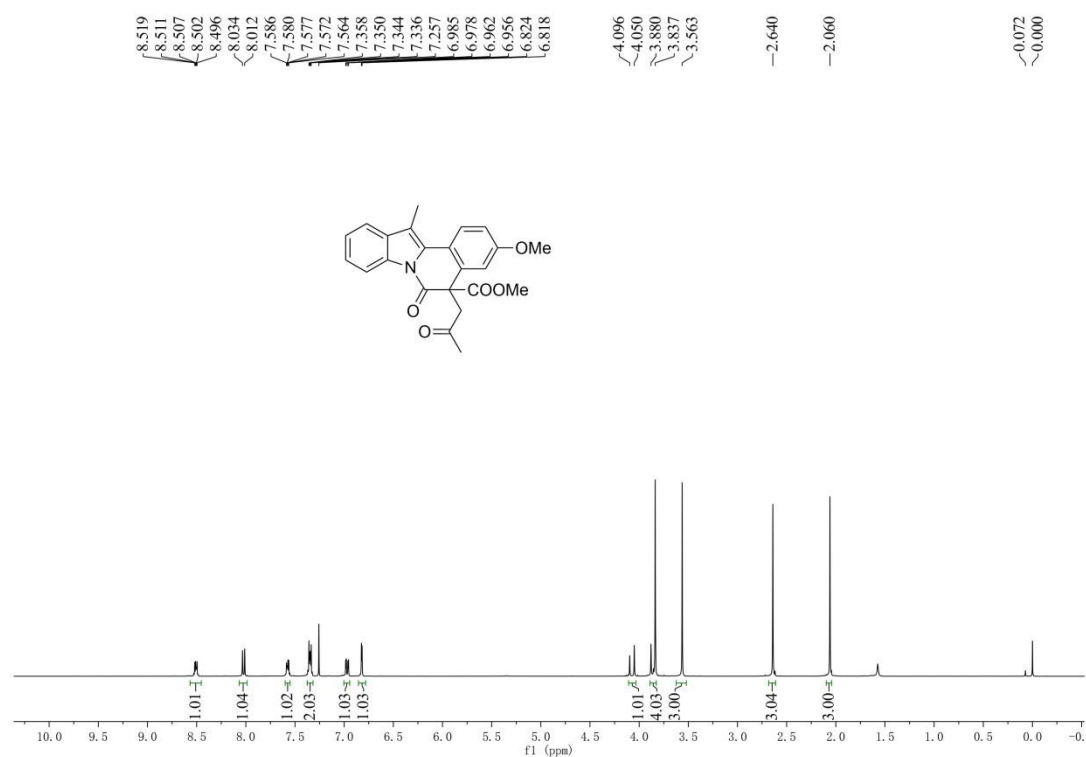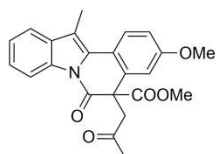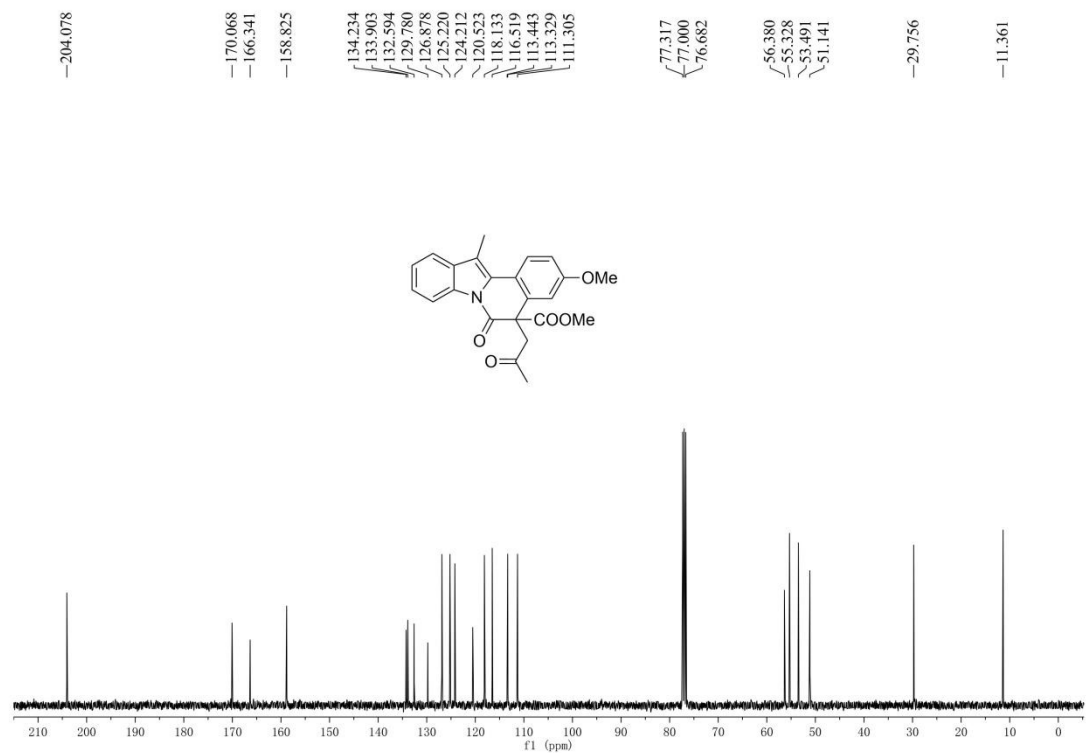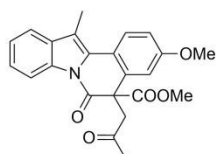

### 3-Methoxy-12-methyl-5-(2-oxopropyl)indolo[2,1-a]isoquinolin-6(5H)-one (3la)

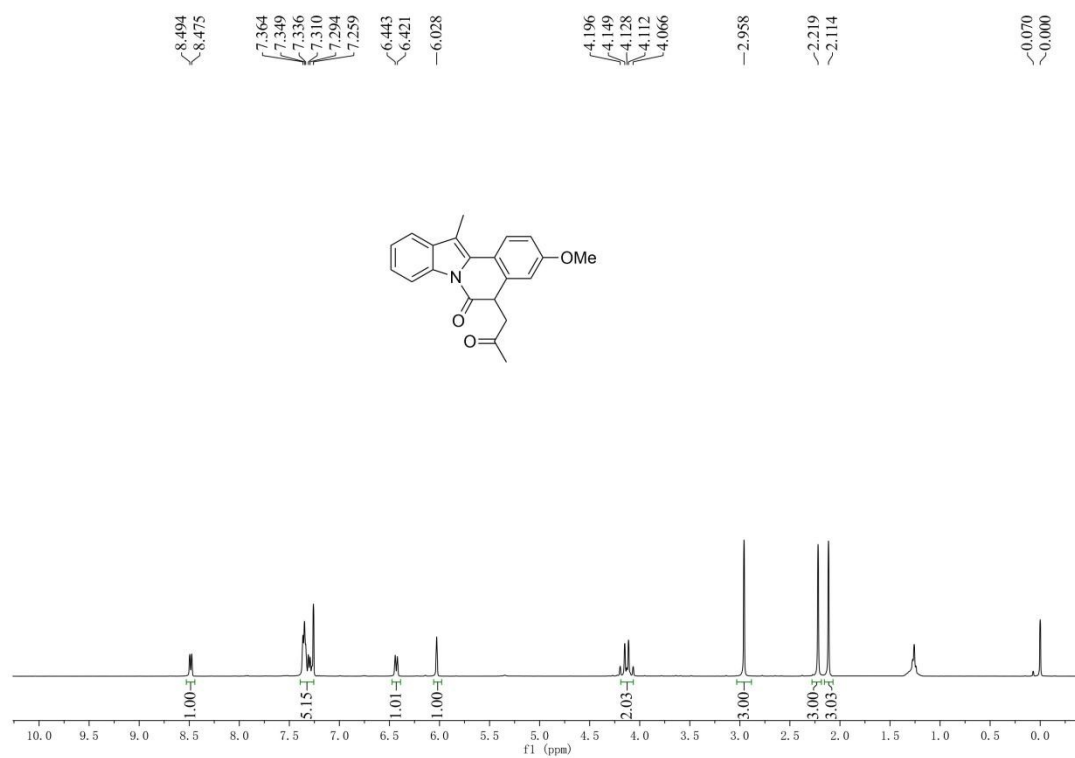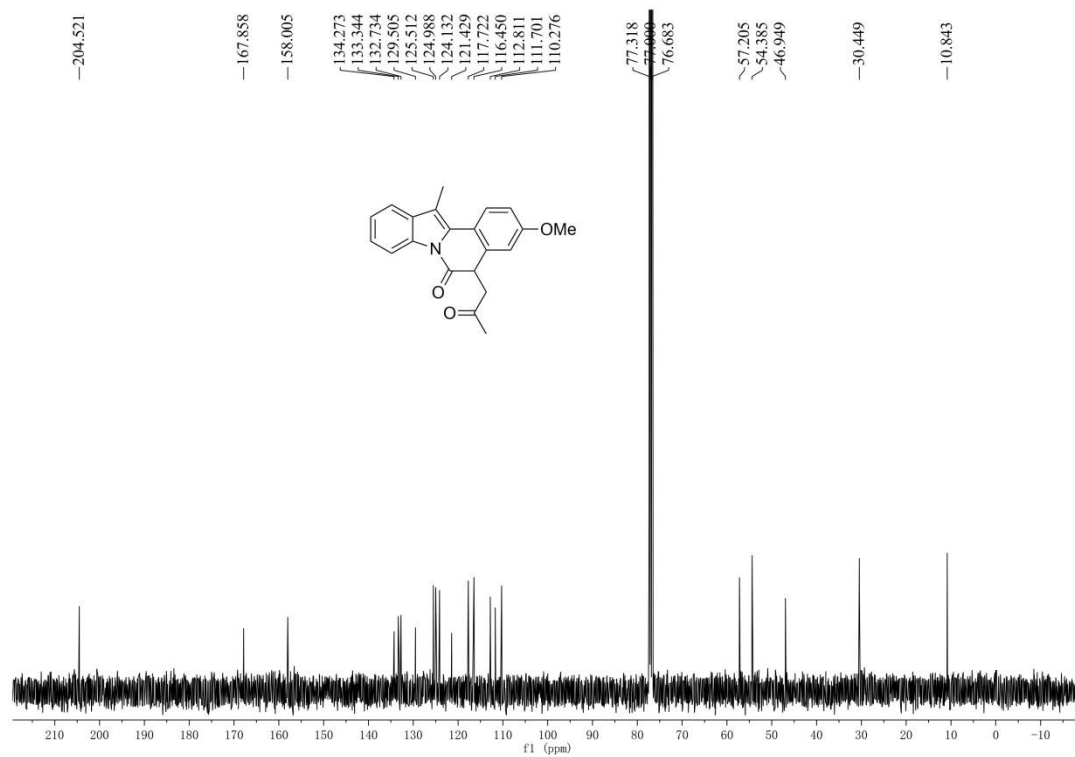

# Ethyl 5,9-dimethyl-6-oxo-5-(2-oxopropyl)-5,6-dihydroindolo[2,1-a]isoquinoline-1 2-carboxylate (3ma)

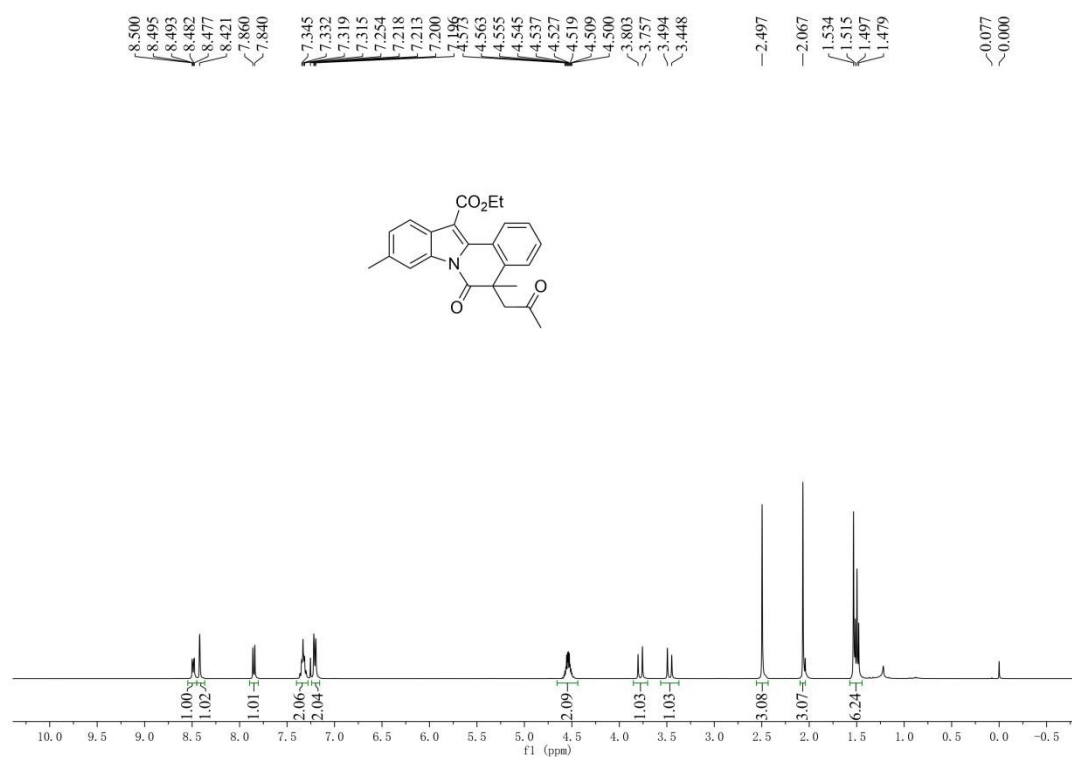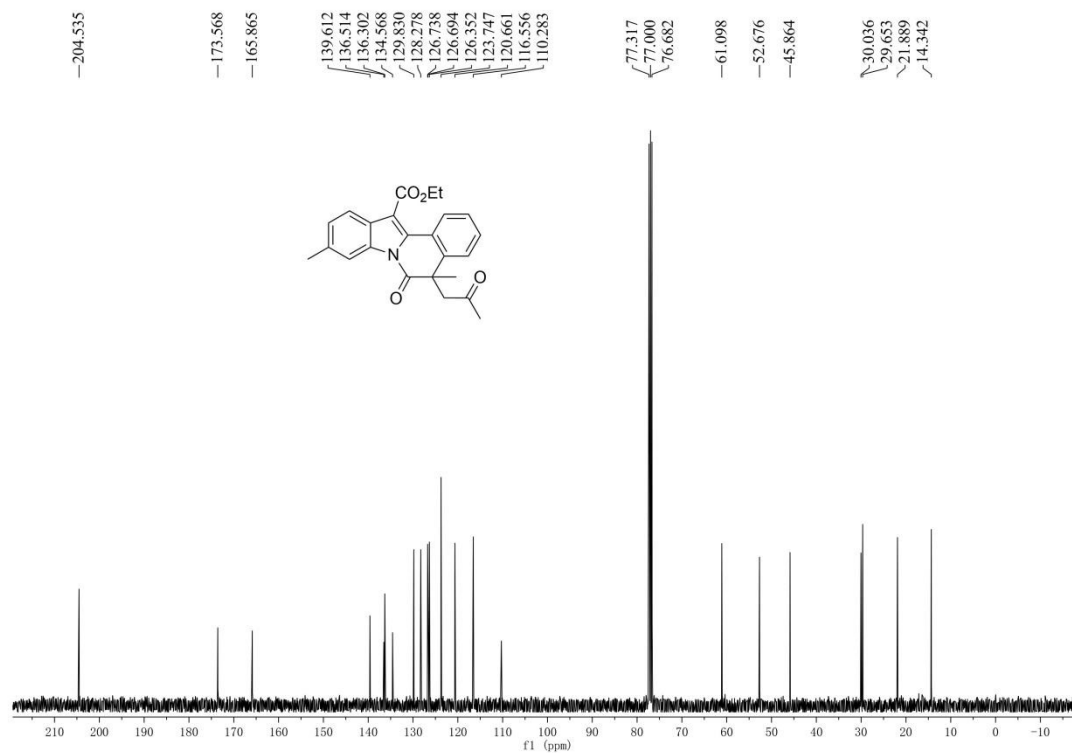

# Ethyl 5-methyl-6-oxo-5-(2-oxopropyl)-5,6-dihydroindolo[2,1-a]isoquinoline-12-carboxylate (3na)

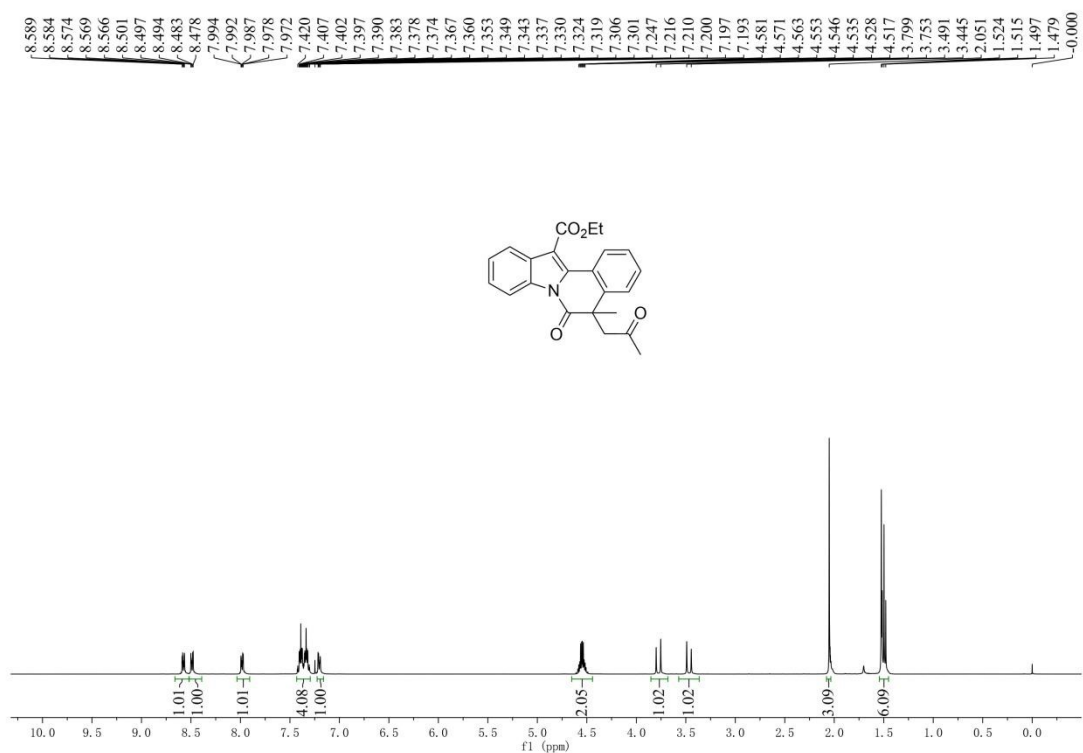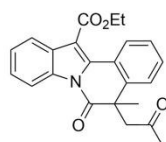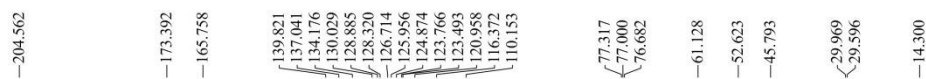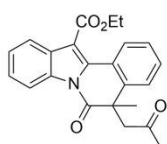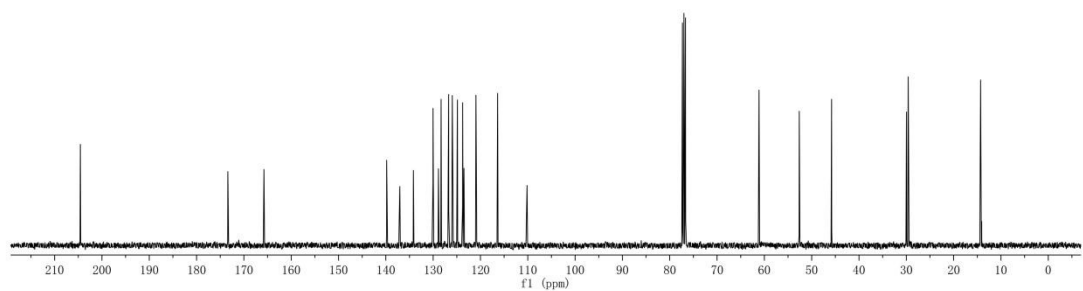

**5,10-Dimethyl-5-(2-oxopropyl)-12-phenylindolo[2,1-*a*]isoquinolin-6(5*H*)-one  
(30a)**

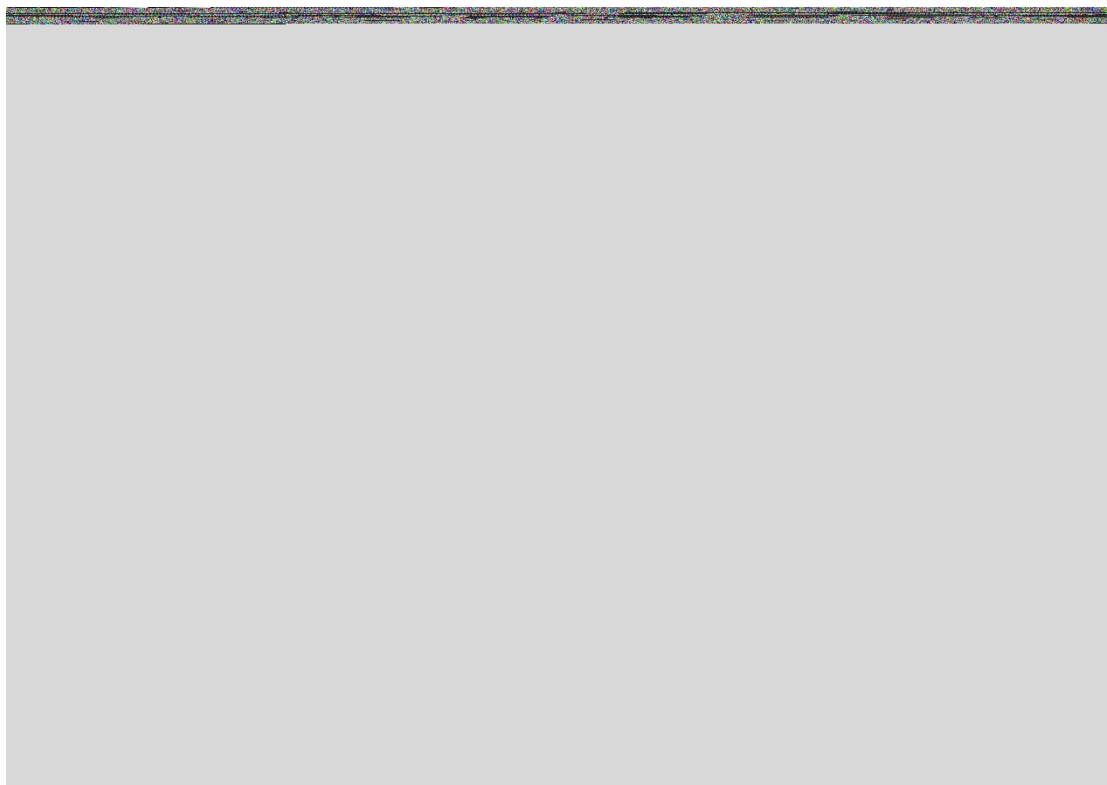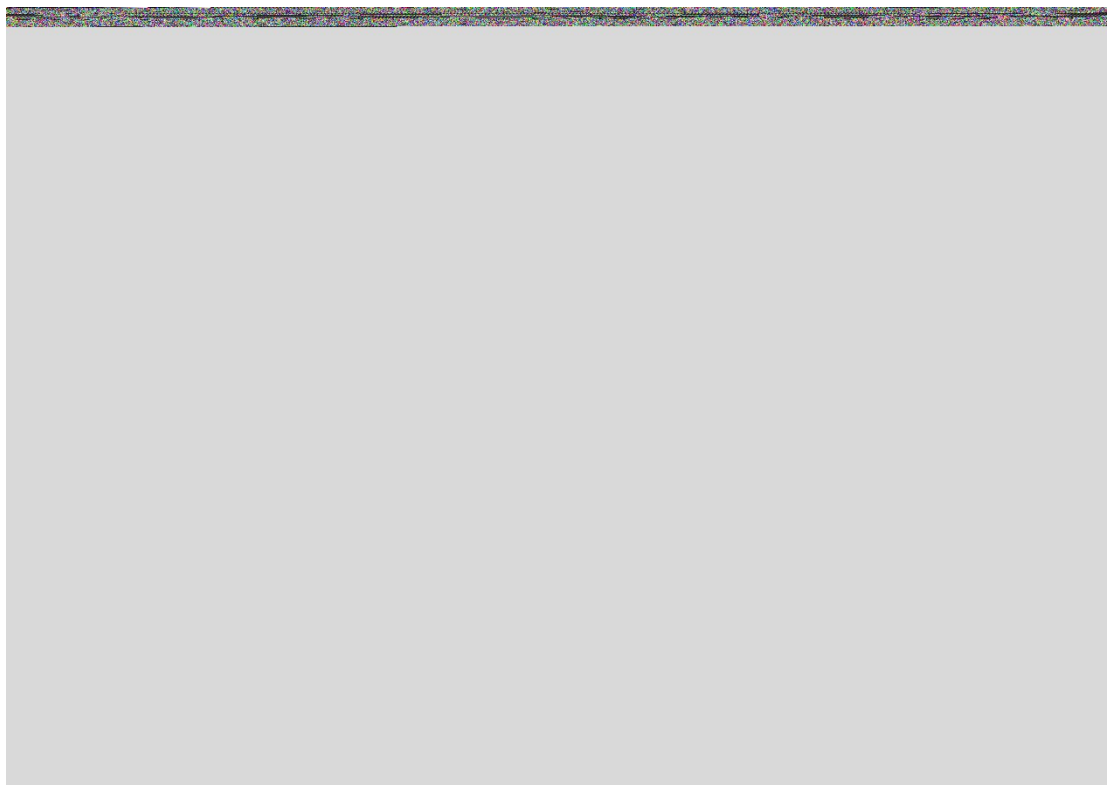



# 5-Methyl-5-(2-oxopropyl)-12-phenylindolo[2,1-a]isoquinolin-6(5H)-one (3pa)

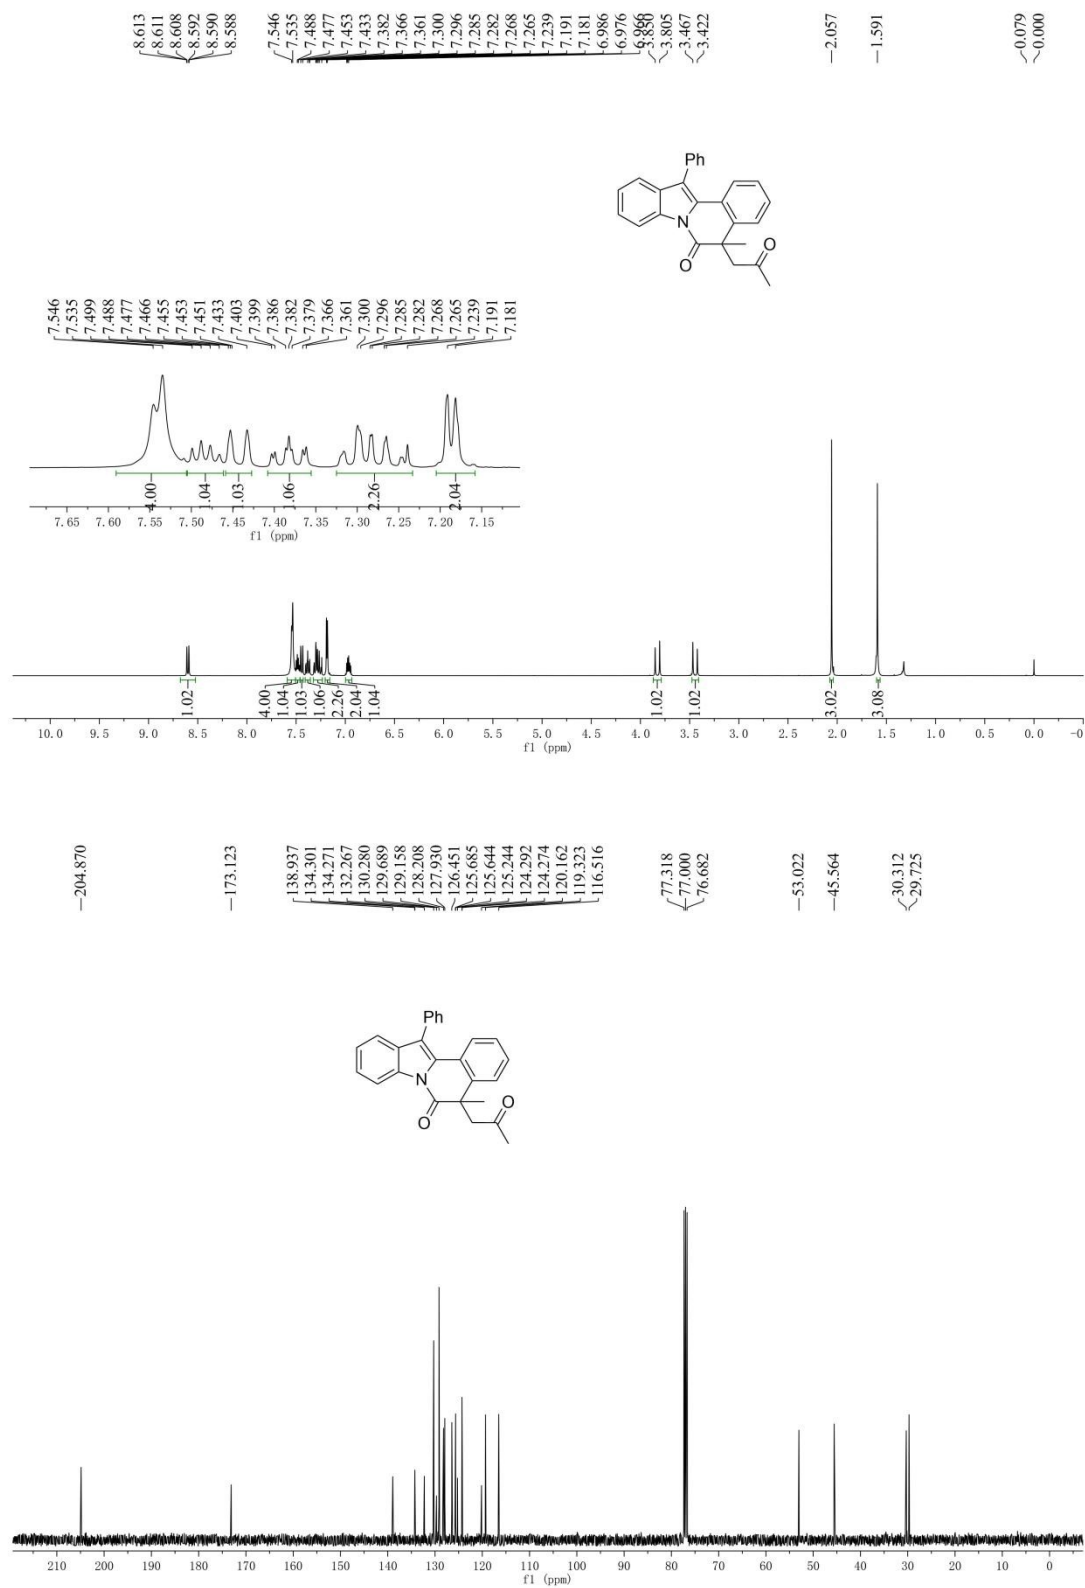

**10-Fluoro-5-methyl-5-(2-oxopropyl)-12-phenylindolo[2,1-a]isoquinolin-6(5H)-one (3qa)**

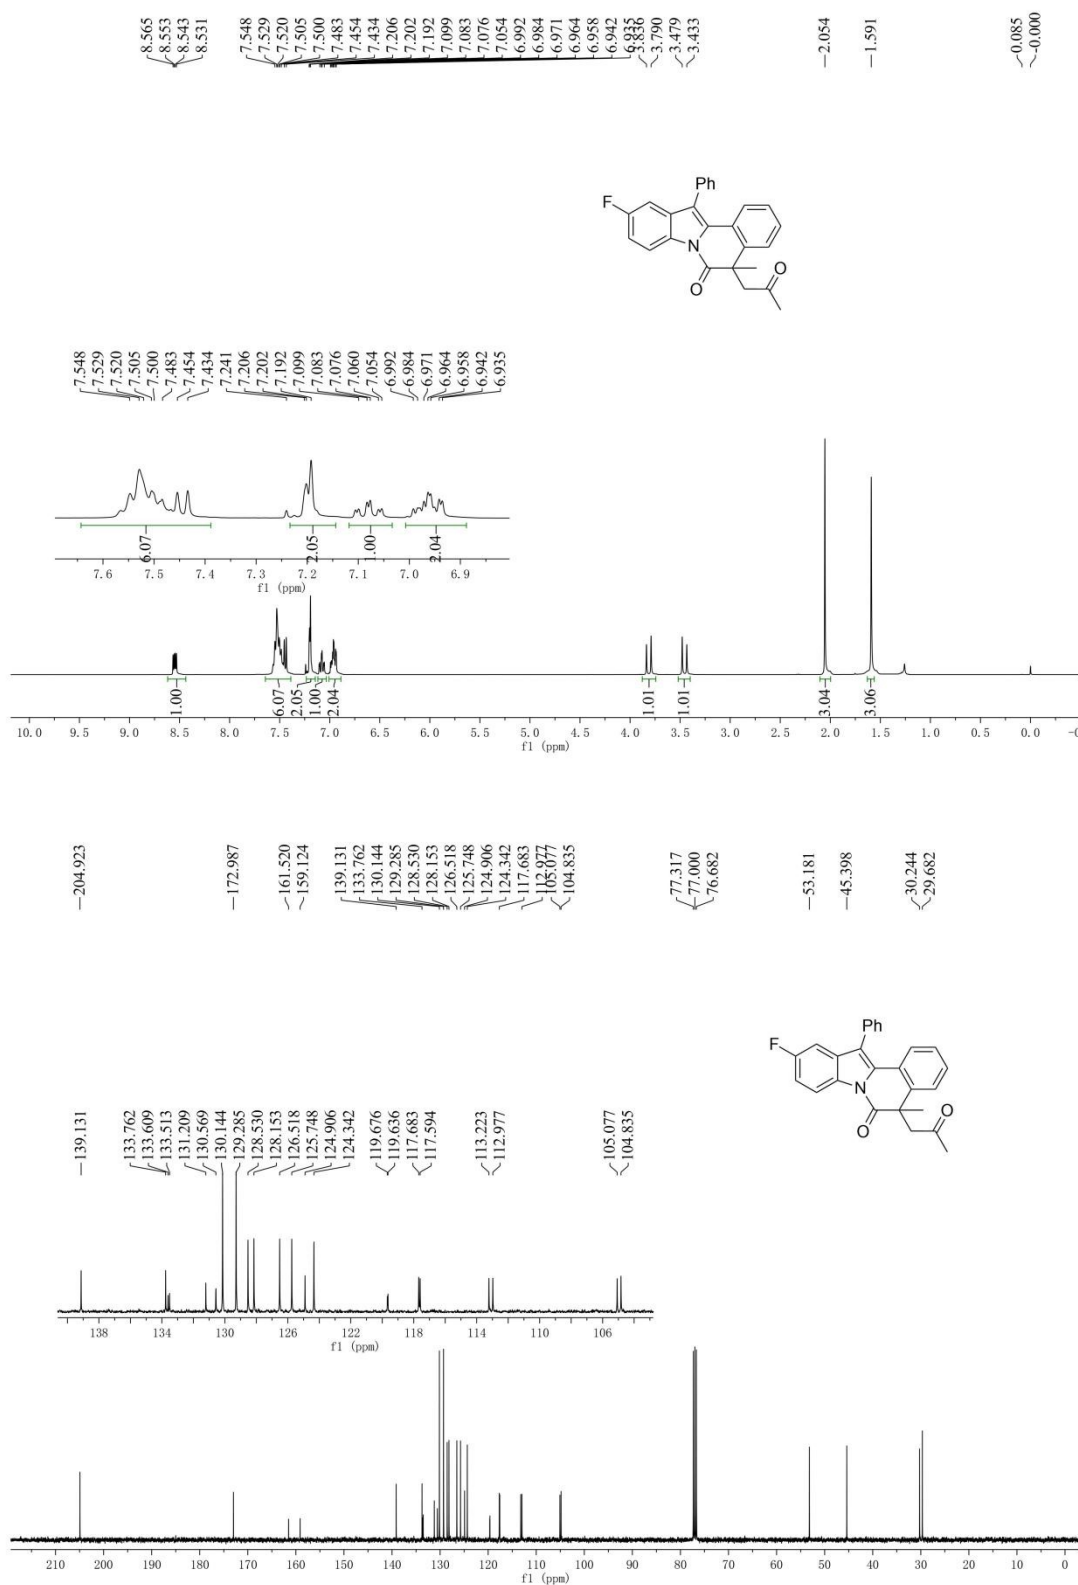

--118.079

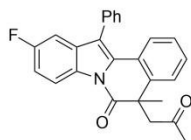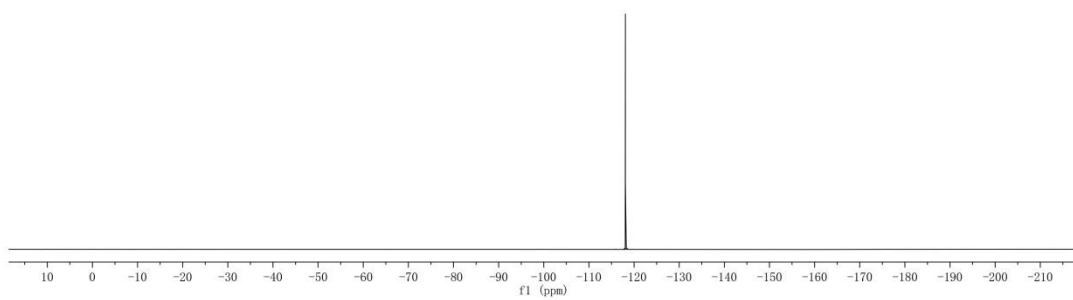

**10-Chloro-5-methyl-5-(2-oxopropyl)-12-phenylindolo[2,1-a]isoquinolin-6(5H)-one (3ra)**

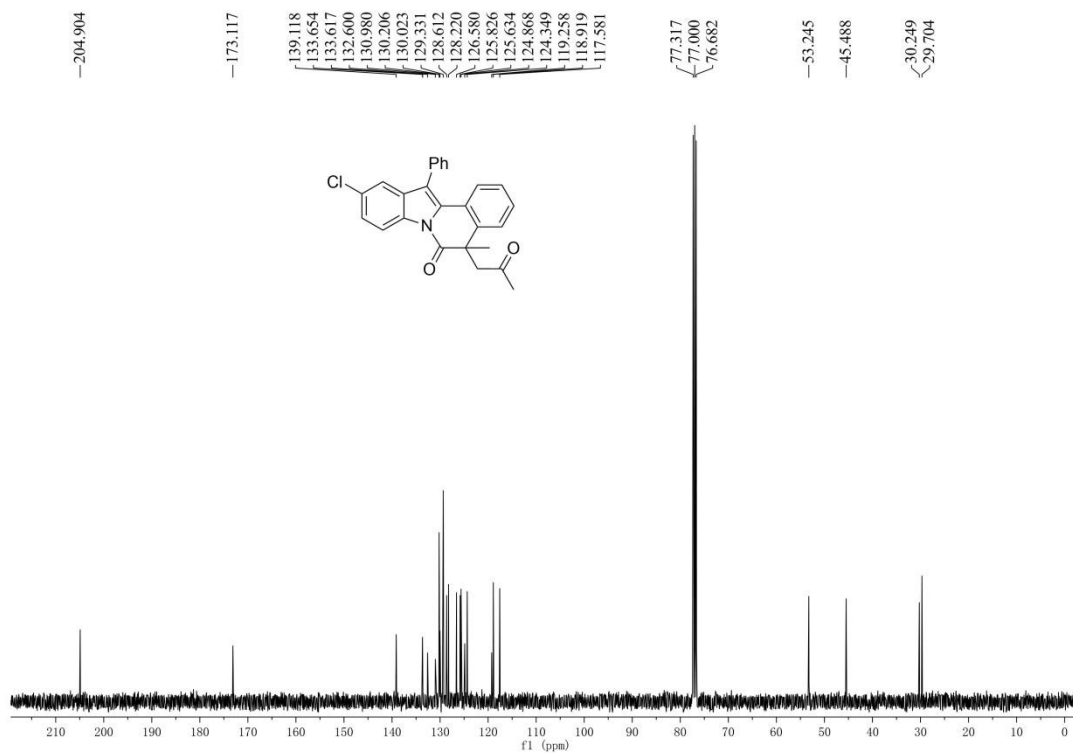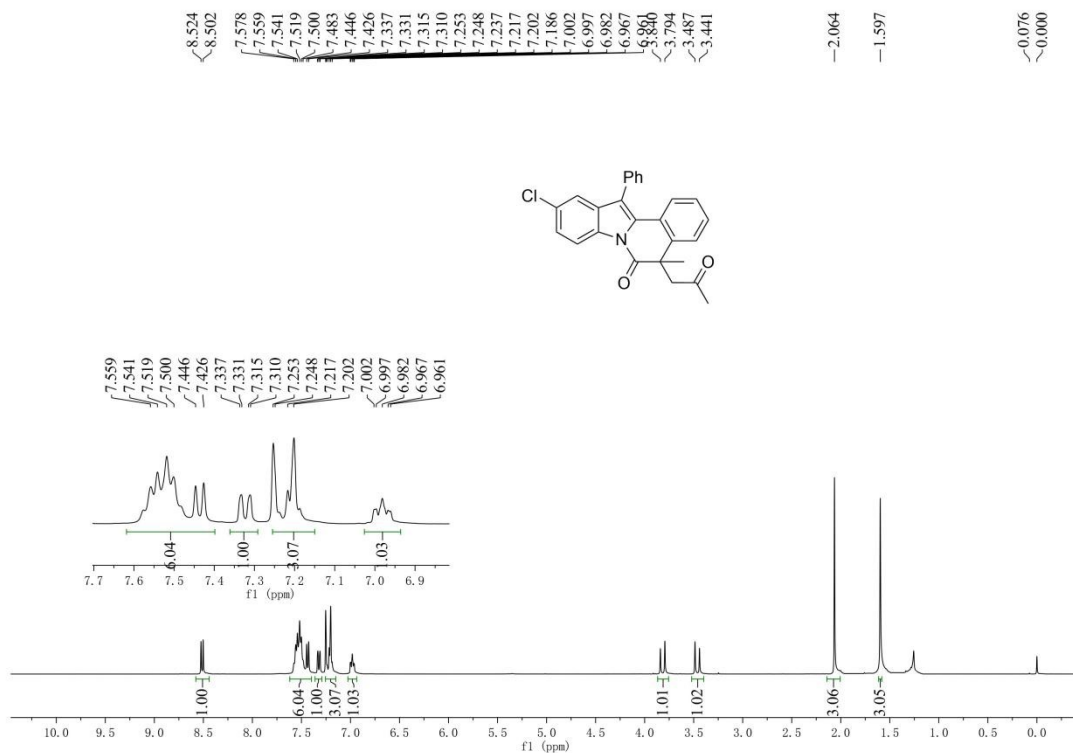

# 10-Bromo-5-methyl-5-(2-oxopropyl)-12-phenylindolo[2,1-a]isoquinolin-6(5H)-one (3sa)

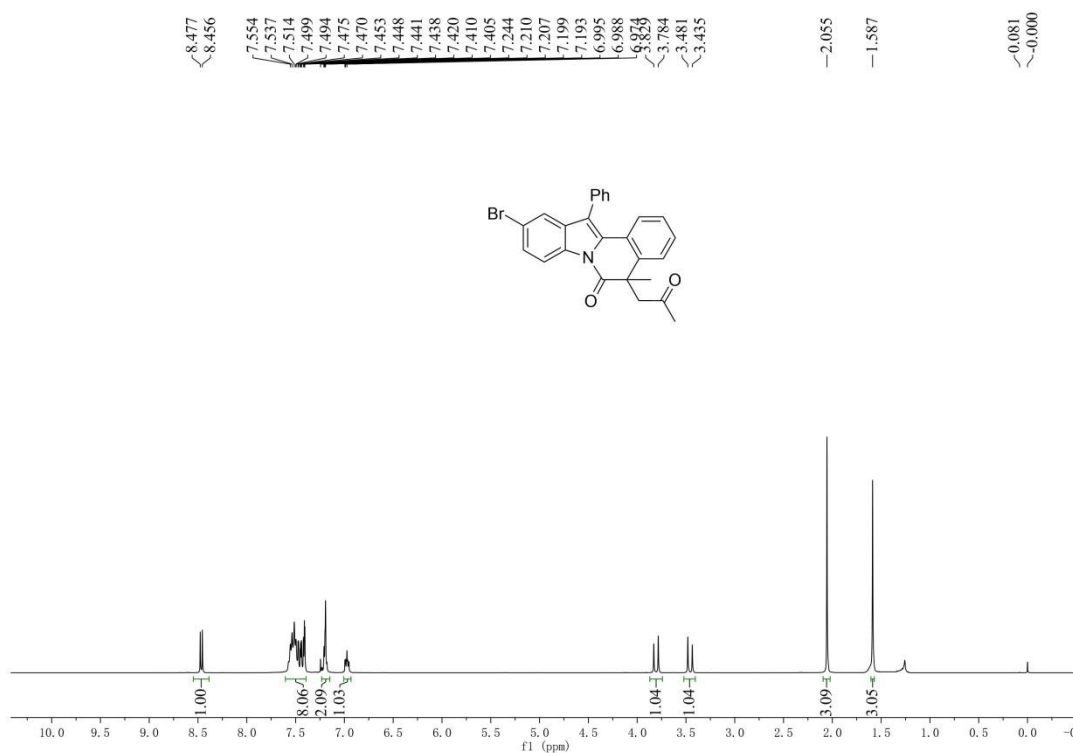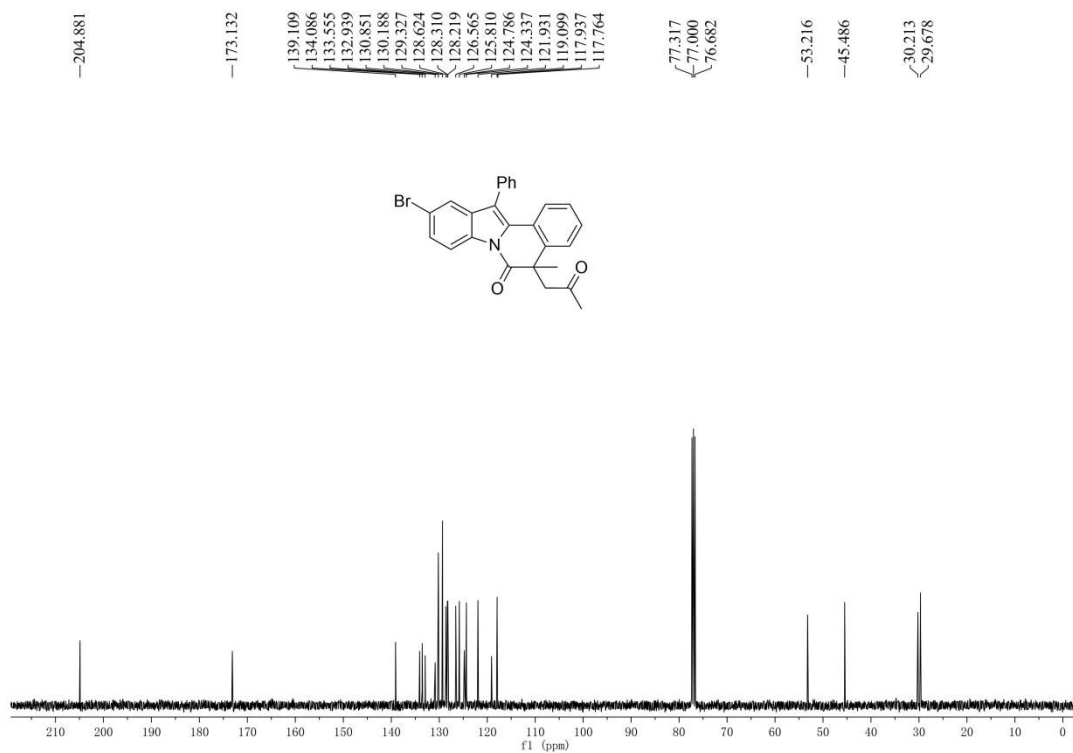

**5-Methyl-5-(2-oxopropyl)-12-phenyl-10-(trifluoromethyl)indolo[2,1-*a*]isoquinolin-6(5*H*)-one (3ta)**

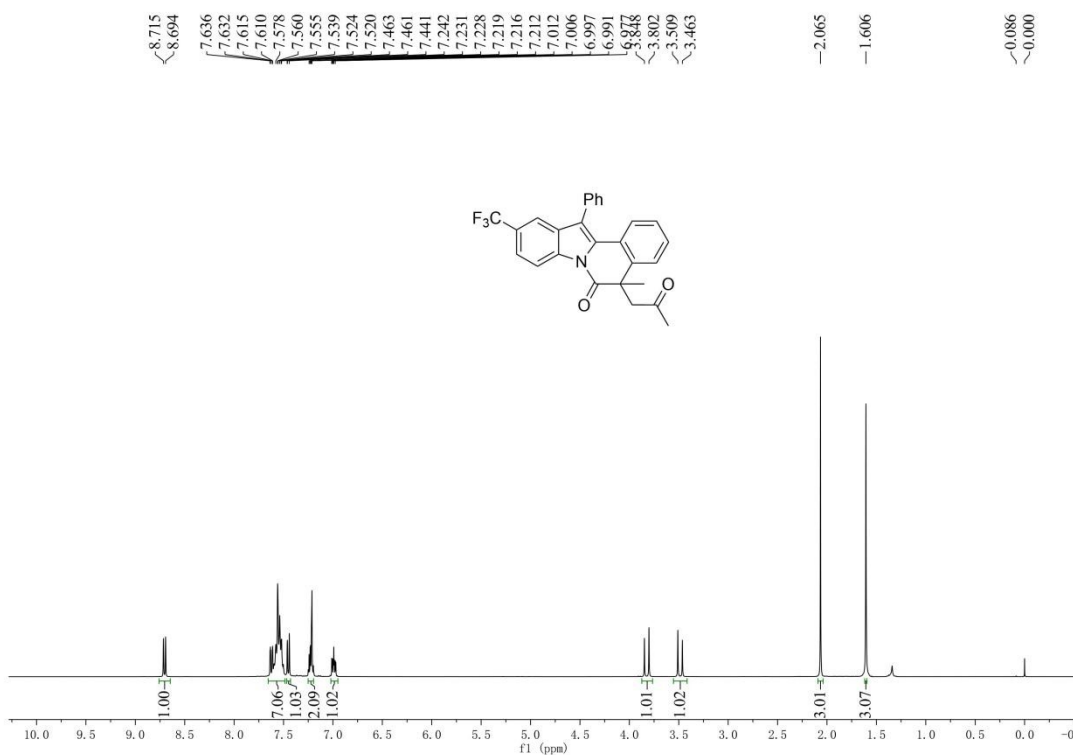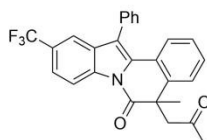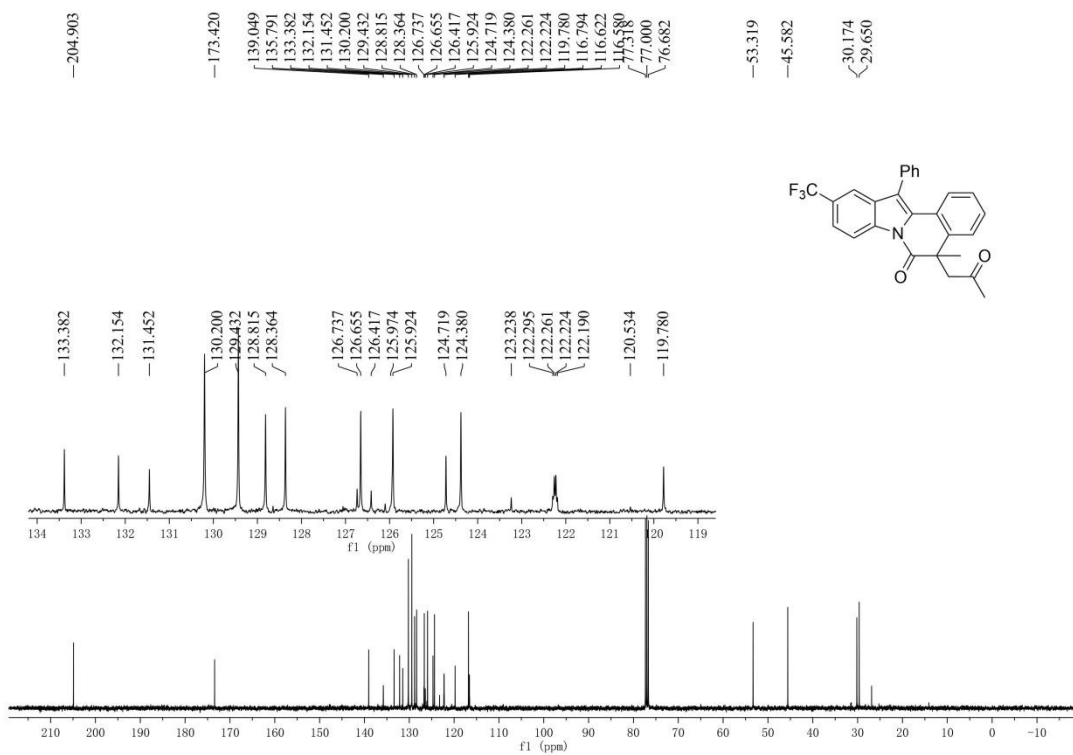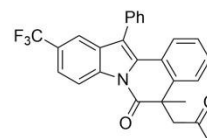

--61.124

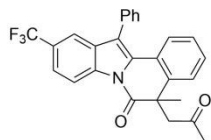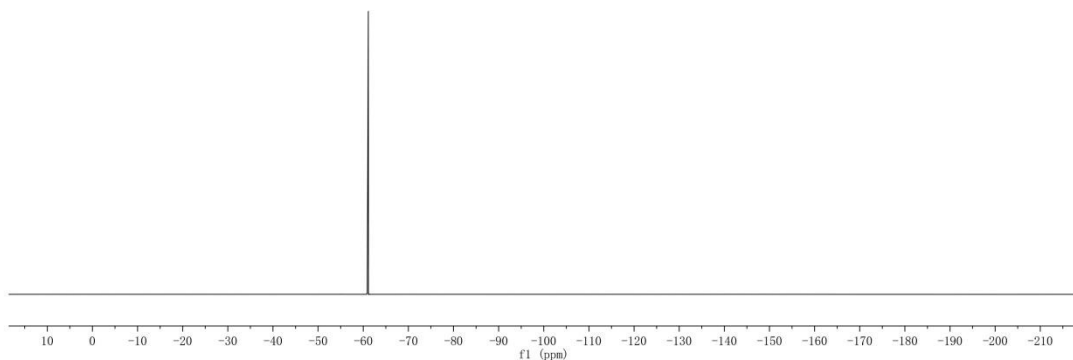

**5-Methyl-6-oxo-5-(2-oxopropyl)-12-phenyl-5,6-dihydroindolo[2,1-a]isoquinoline-10-carbonitrile (3ua)**

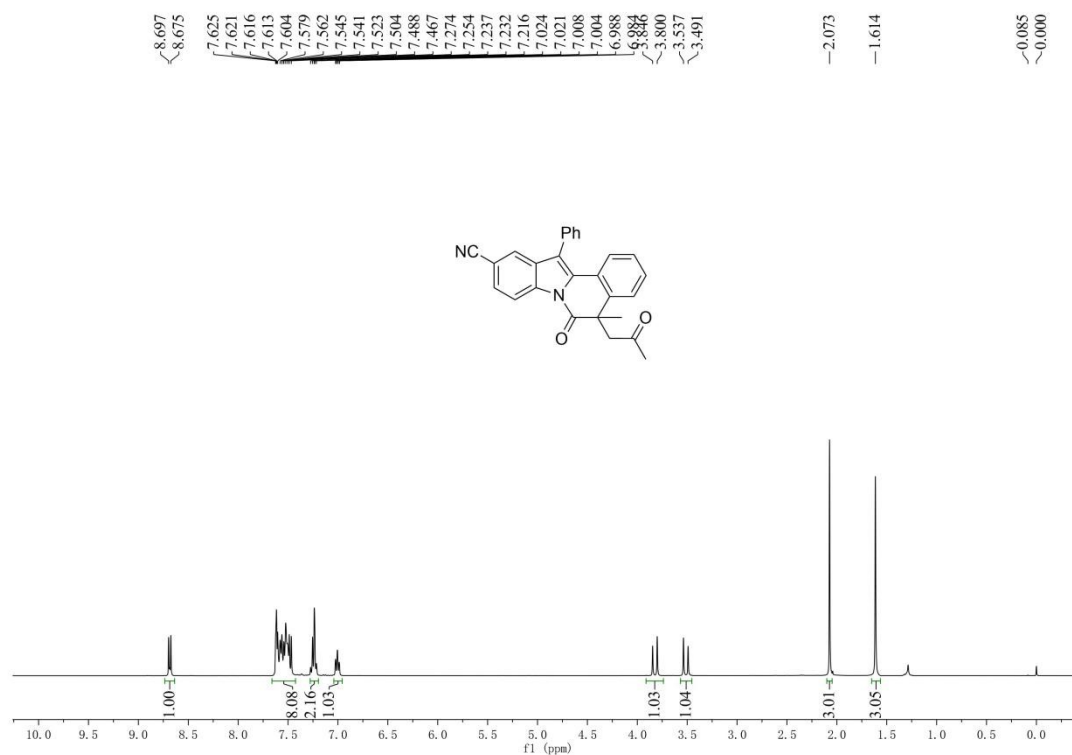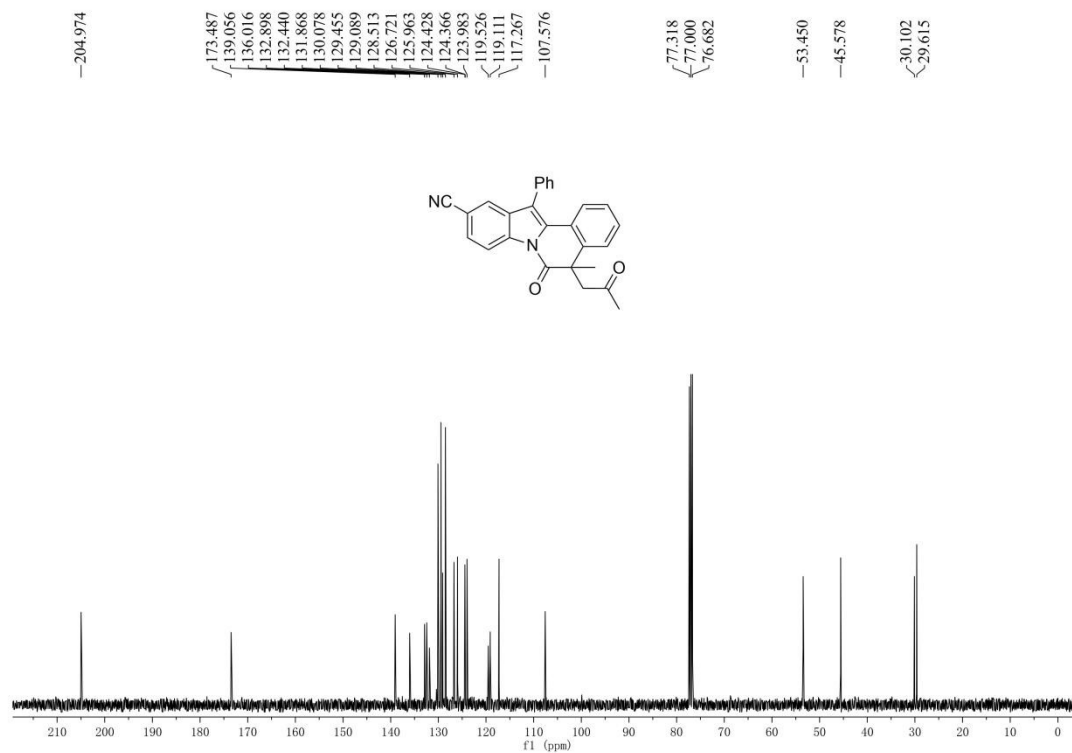



**3-Methoxy-5-methyl-5-(2-oxopropyl)benzo[4,5]imidazo[2,1-a]isoquinolin-6(5H)-one (3va)**

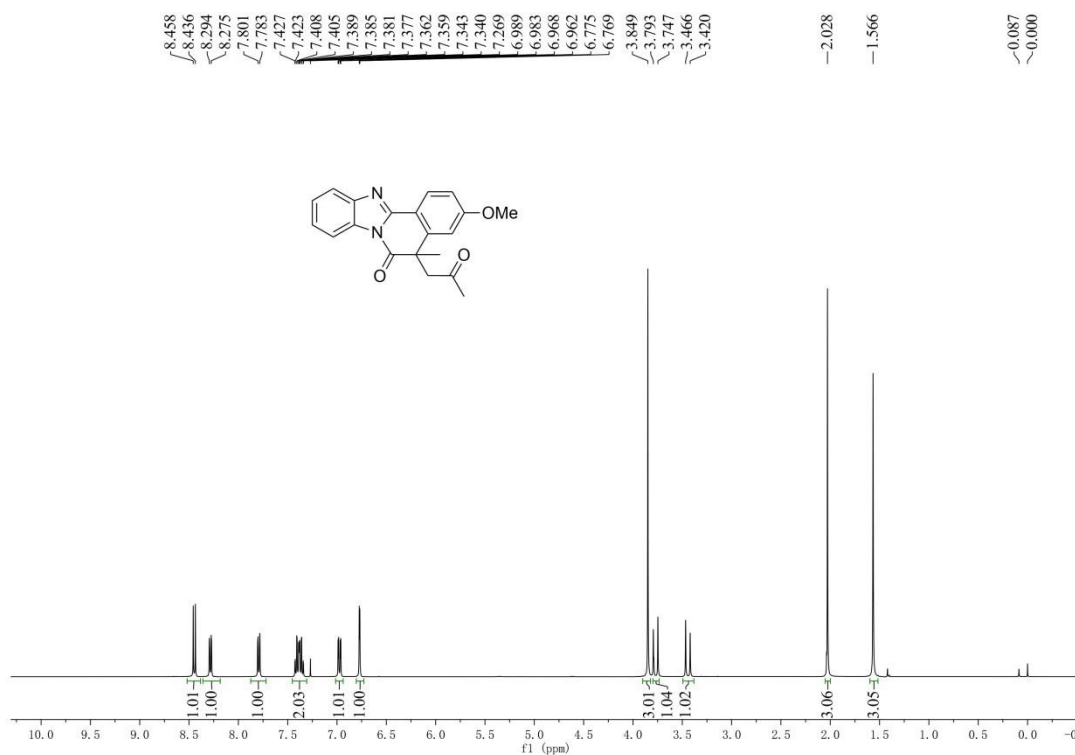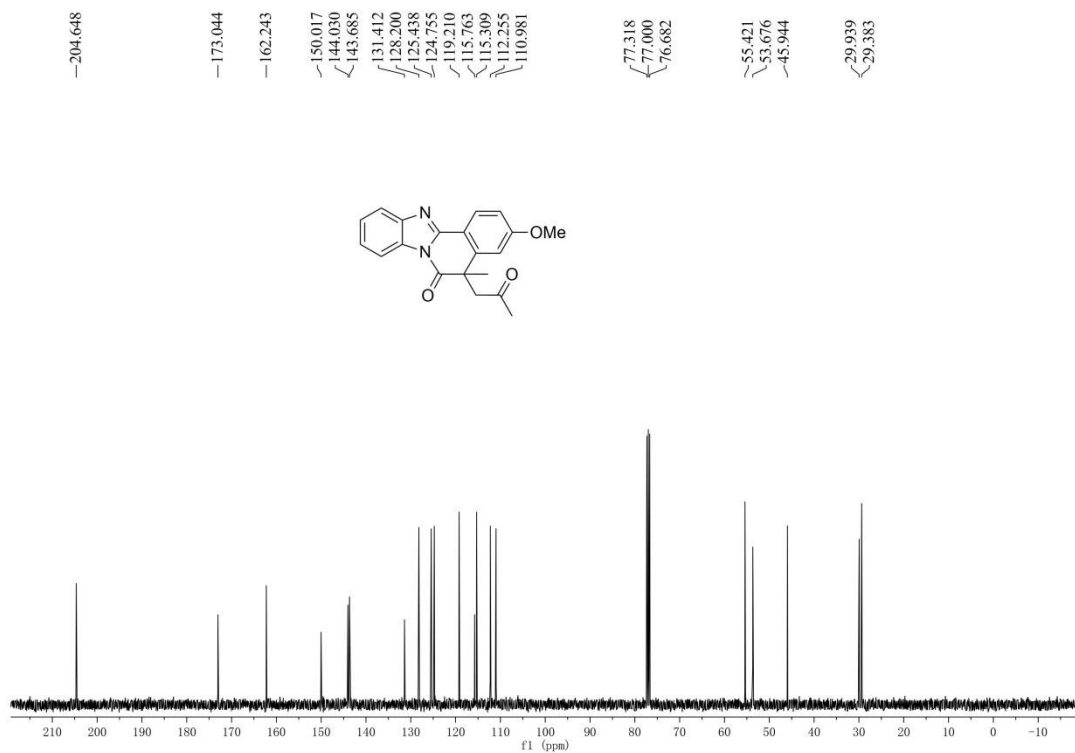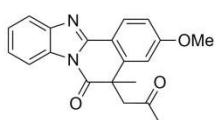

**3,5-Dimethyl-5-(2-oxopropyl)benzo[4,5]imidazo[2,1-*a*]isoquinolin-6(5*H*)-one  
(3wa)**

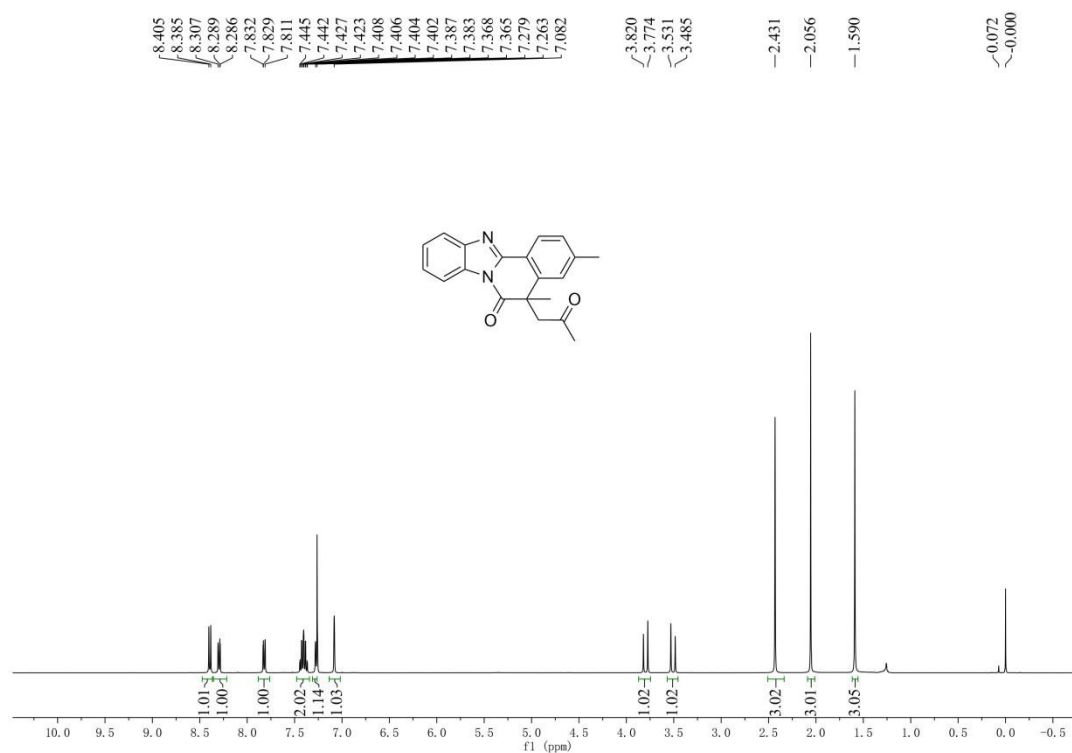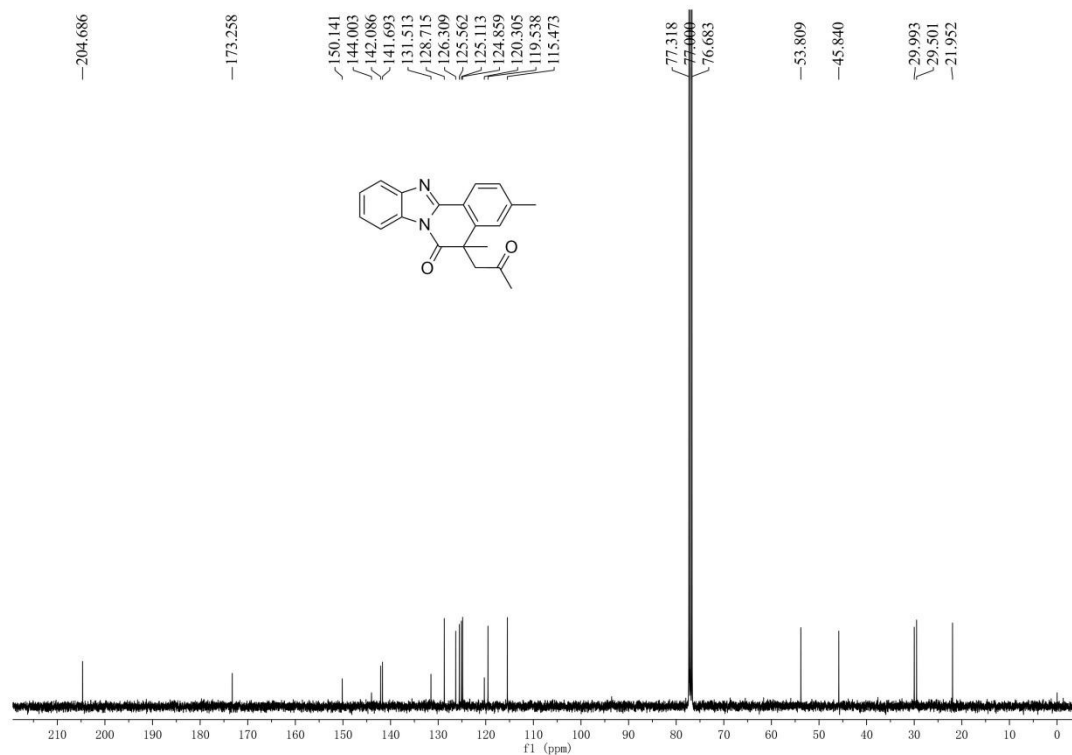

**3-Ethyl-5-methyl-5-(2-oxopropyl)benzo[4,5]imidazo[2,1-a]isoquinolin-6(5H)-one  
(3xa)**

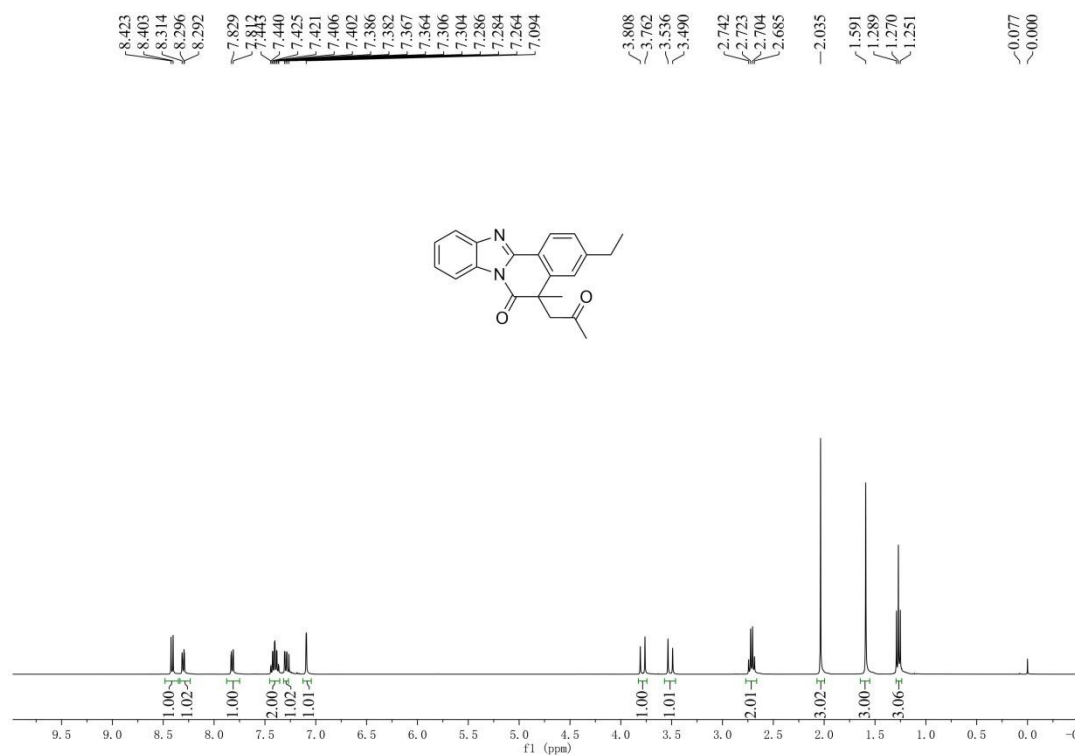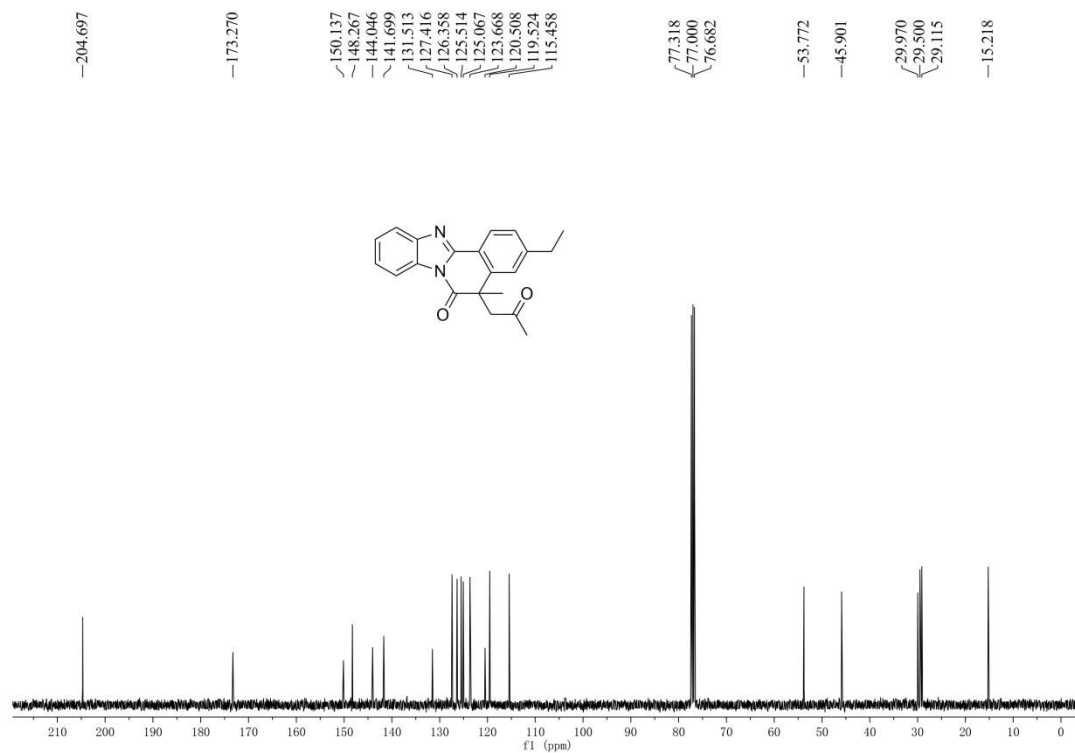

**3-Isopropyl-5-methyl-5-(2-oxopropyl)benzo[4,5]imidazo[2,1-a]isoquinolin-6(5H)-one (3ya)**

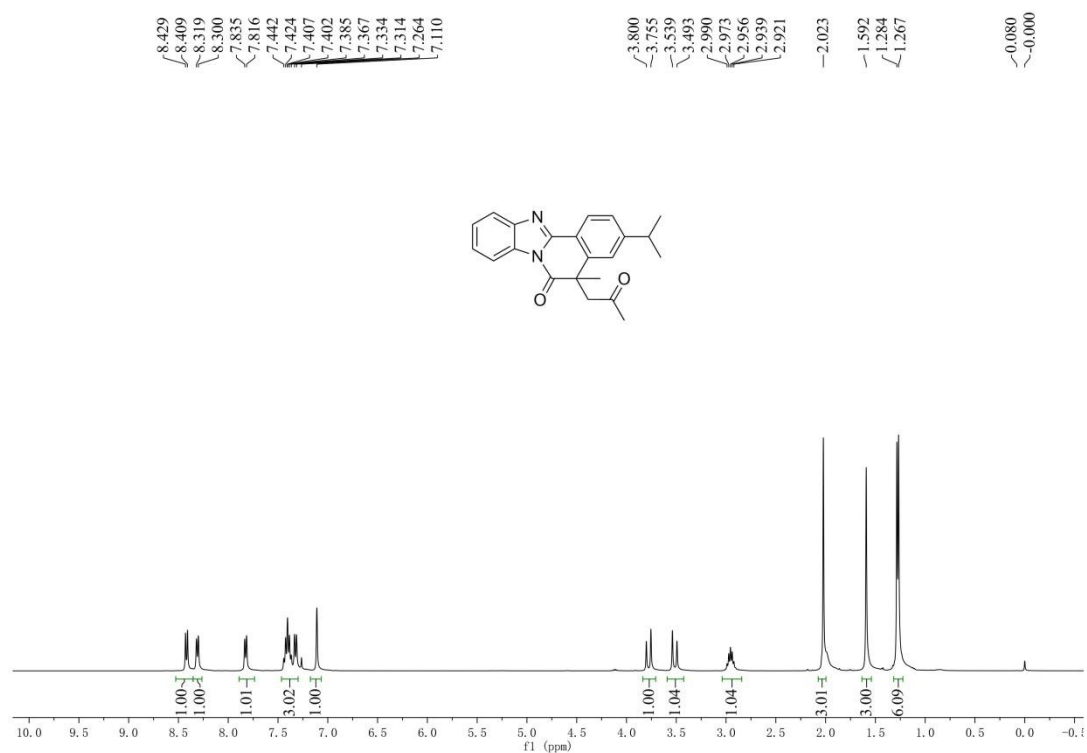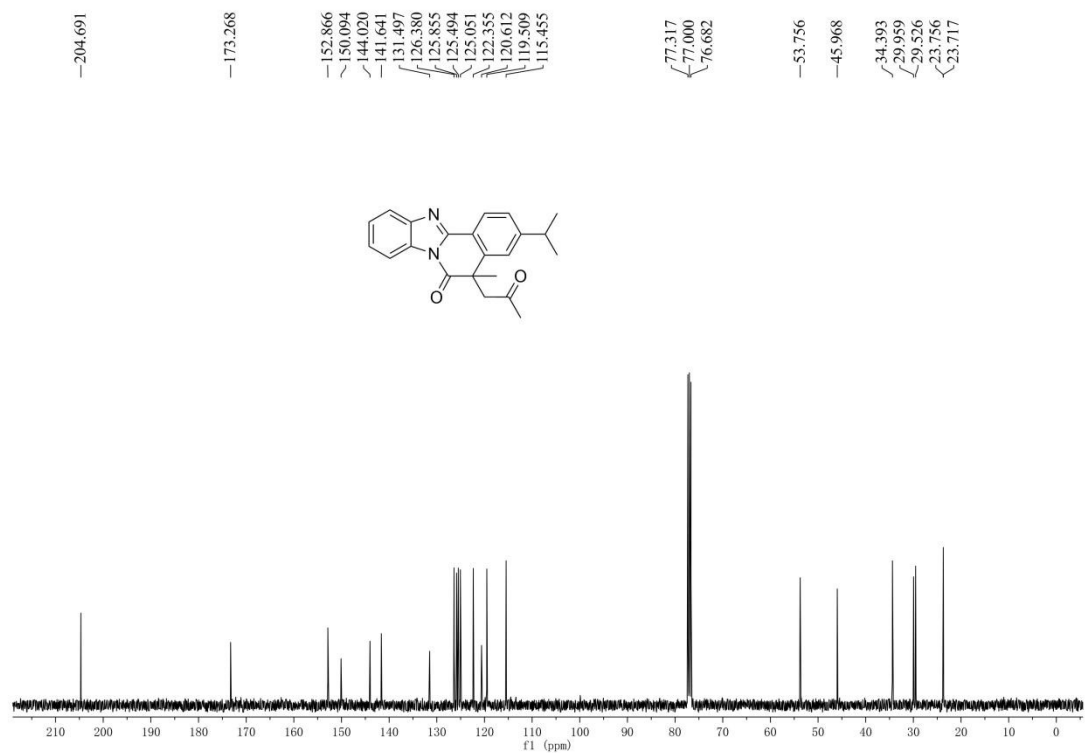

**5-Methyl-5-(2-oxopropyl)benzo[4,5]imidazo[2,1-a]isoquinolin-6(5H)-one (3za)**

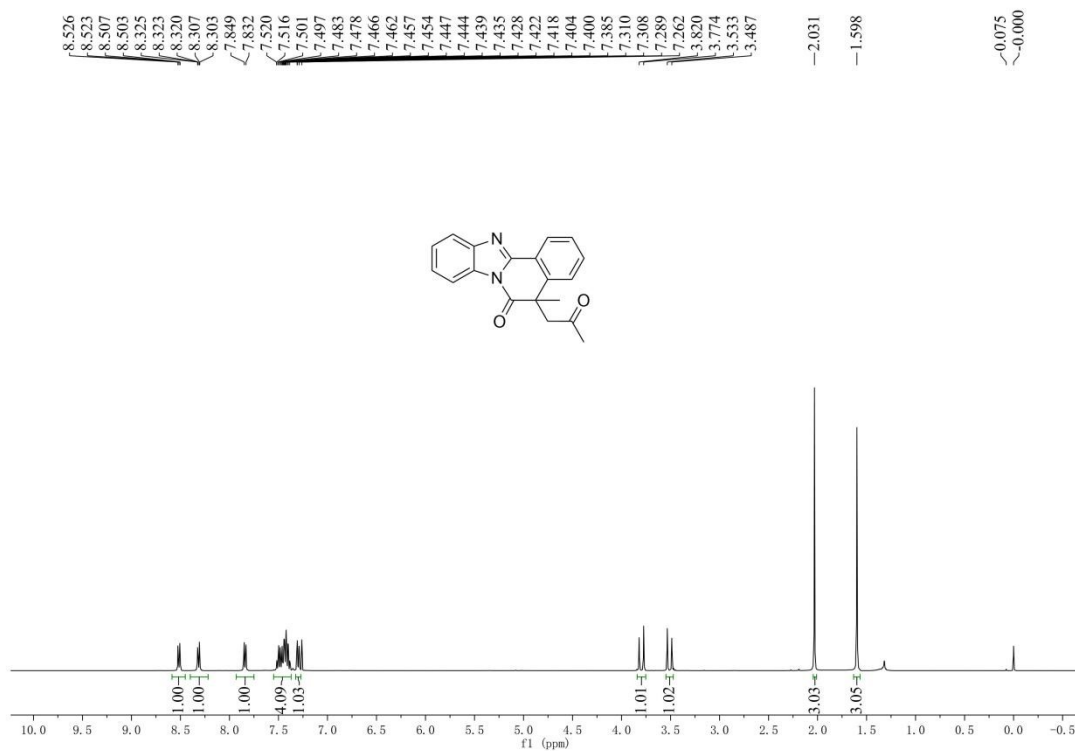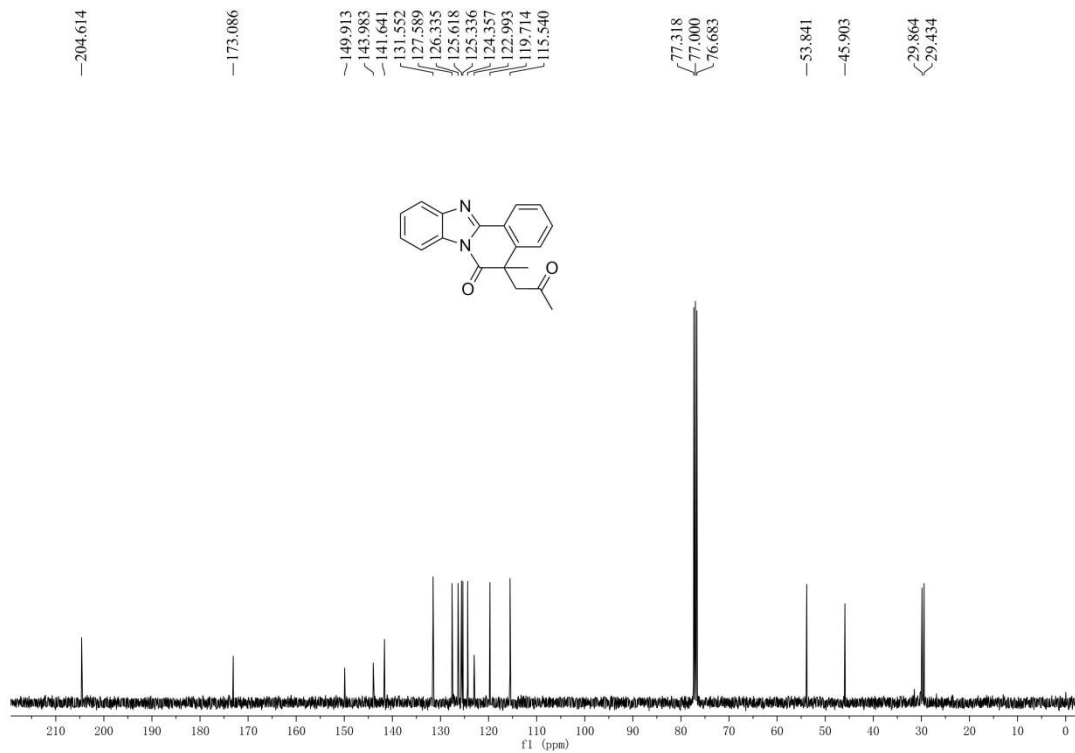

**3-Fluoro-5-methyl-5-(2-oxopropyl)benzo[4,5]imidazo[2,1-a]isoquinolin-6(5H)-one (3aaa)**

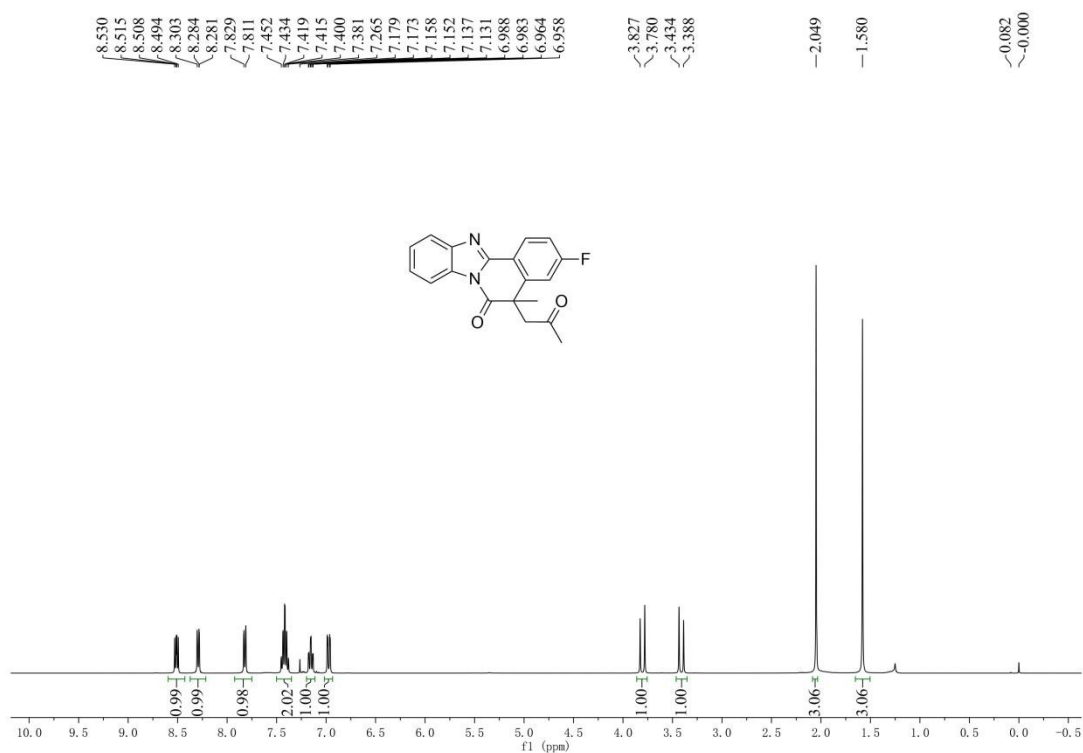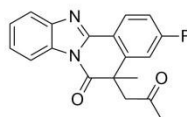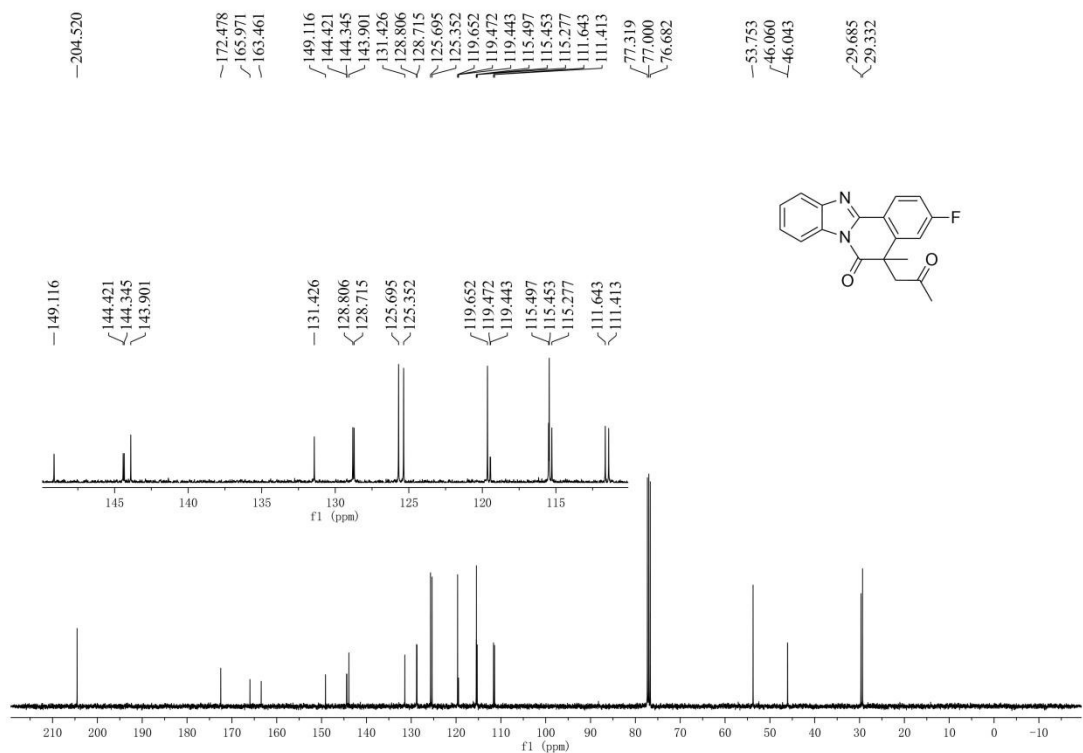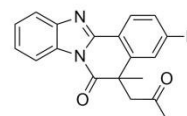

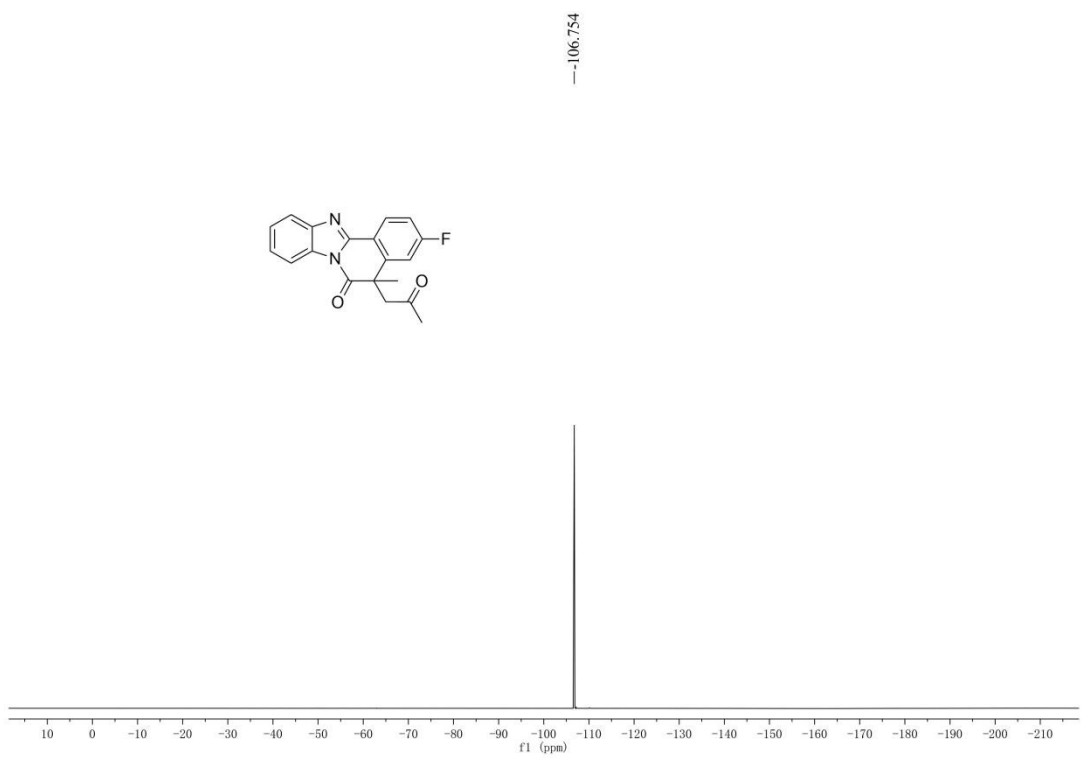

**3-Chloro-5-methyl-5-(2-oxopropyl)benzo[4,5]imidazo[2,1-a]isoquinolin-6(5H)-one (3aba)**

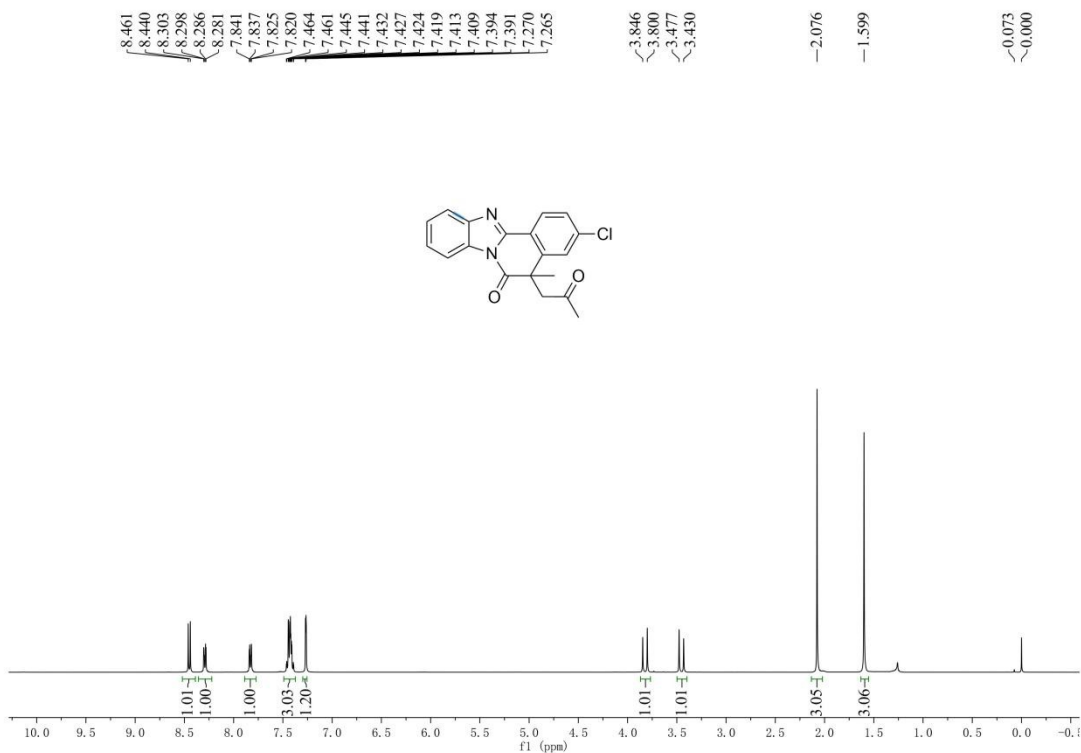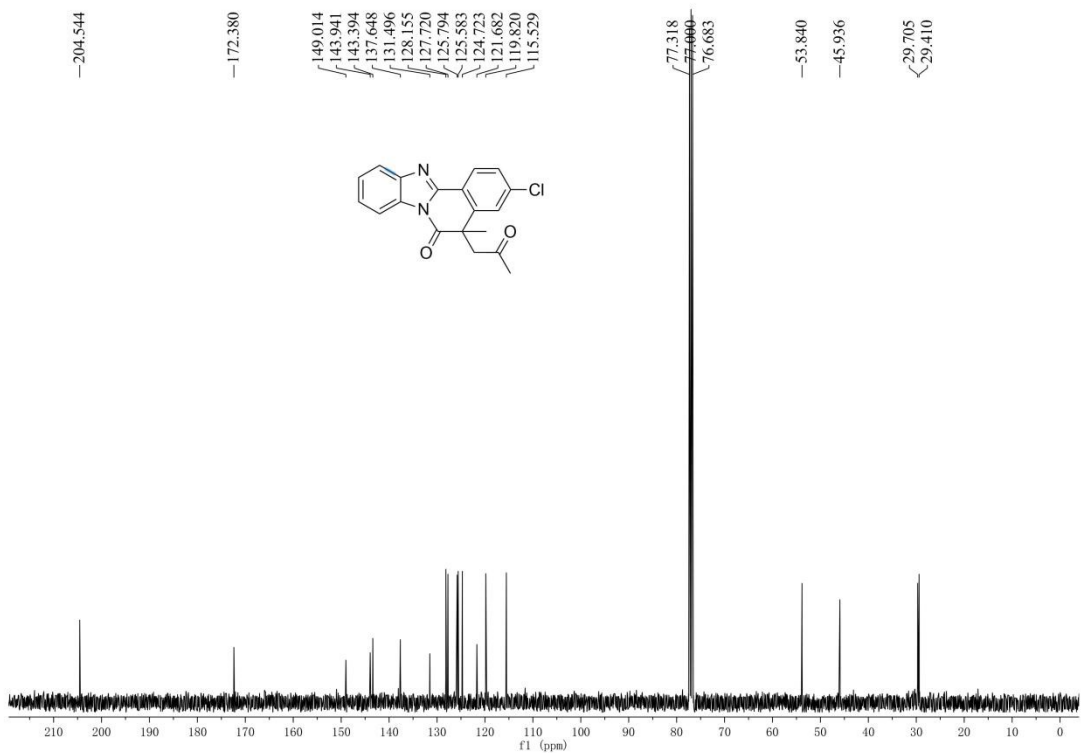



**3-Bromo-5-methyl-5-(2-oxopropyl)benzo[4,5]imidazo[2,1-a]isoquinolin-6(5H)-one (3aca)**

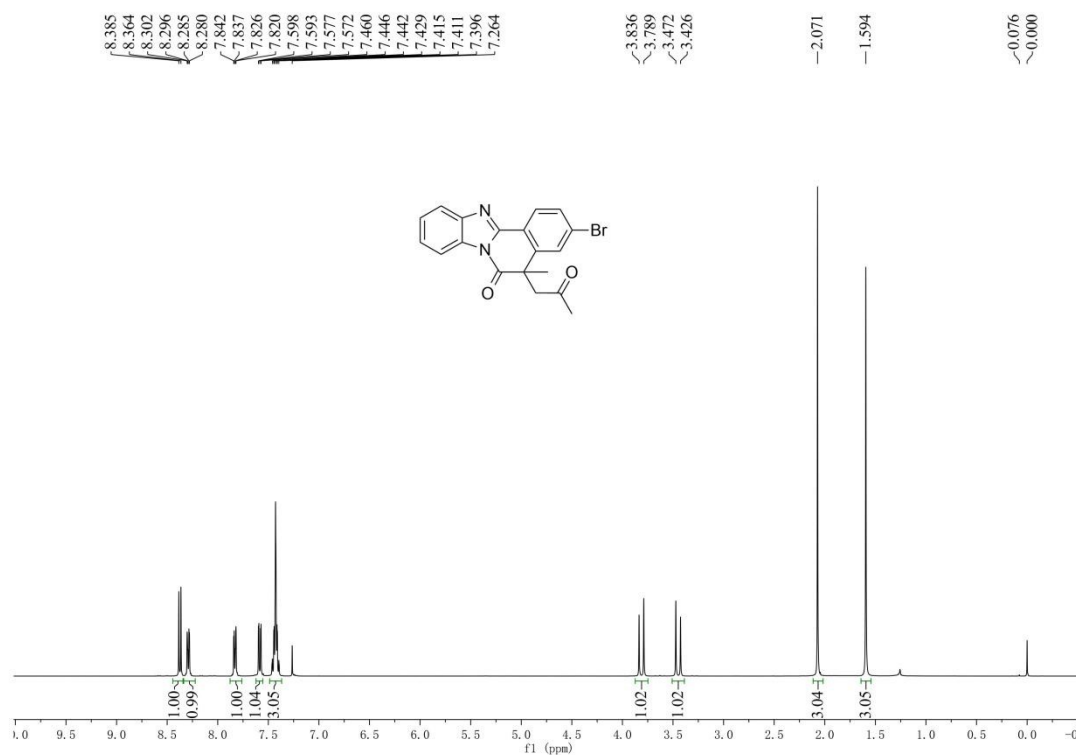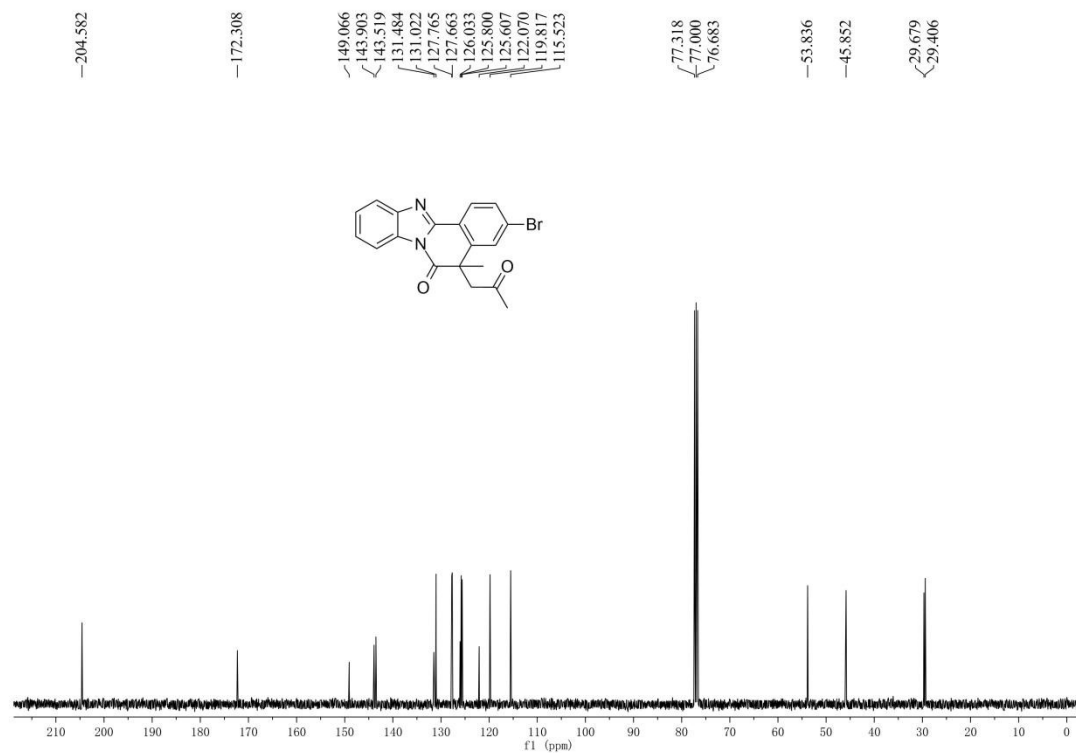

**5-Methyl-6-oxo-5-(2-oxopropyl)-5,6-dihydrobenzo[4,5]imidazo[2,1-*a*]isoquinoline-3-carbonitrile (3ada)**

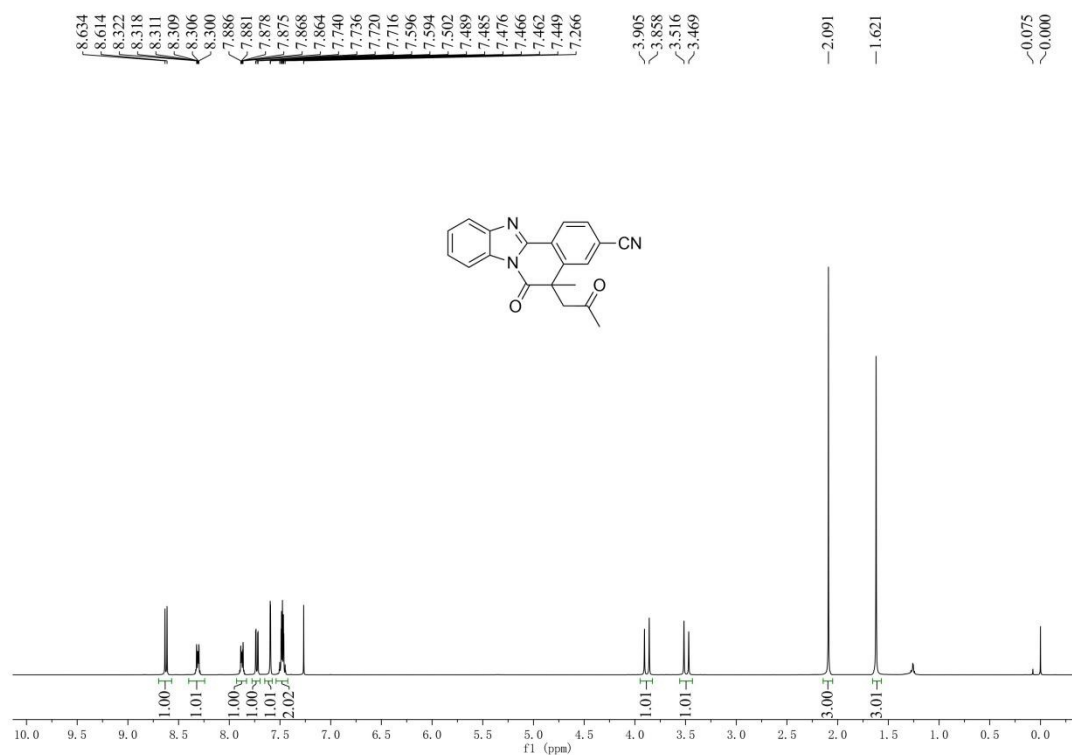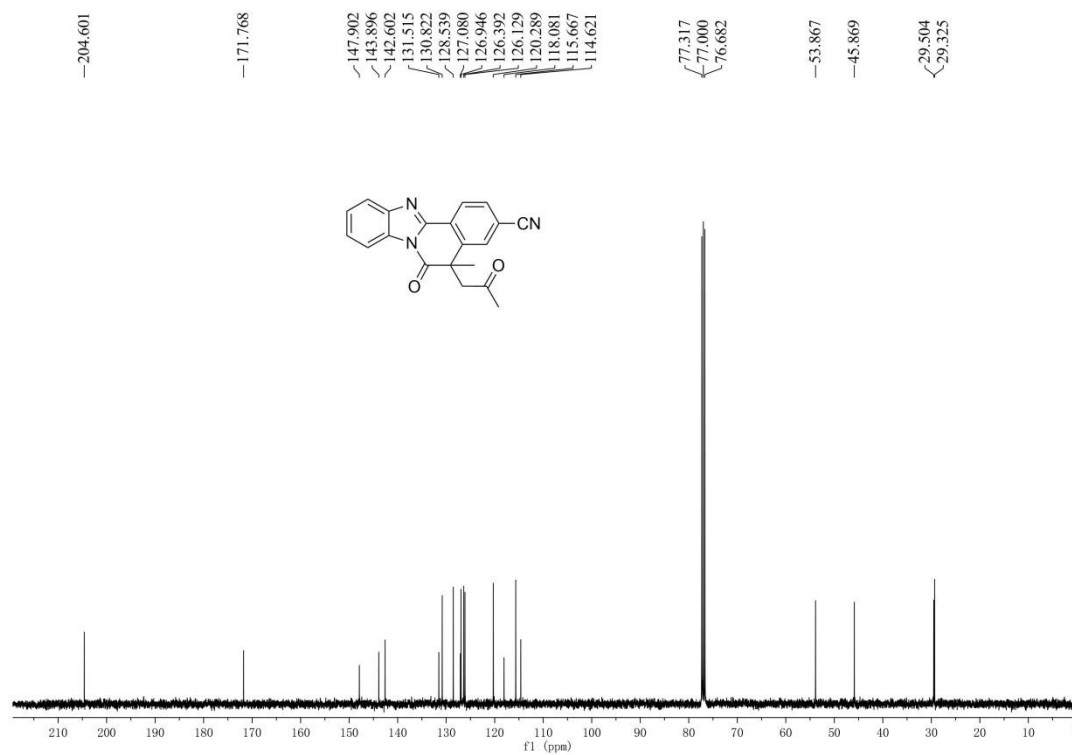

**5-Methyl-5-(2-oxopropyl)-3-(trifluoromethyl)benzo[4,5]imidazo[2,1-*a*]isoquinolin-6(5*H*)-one (3aea)**

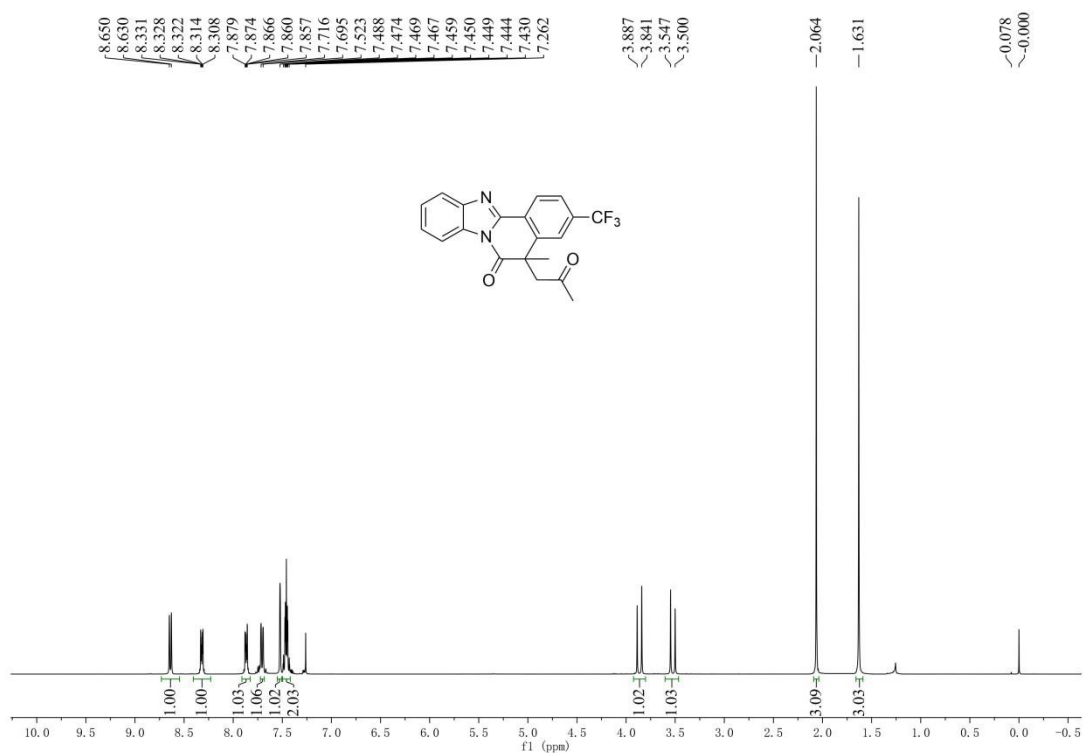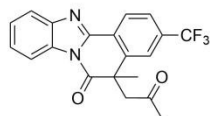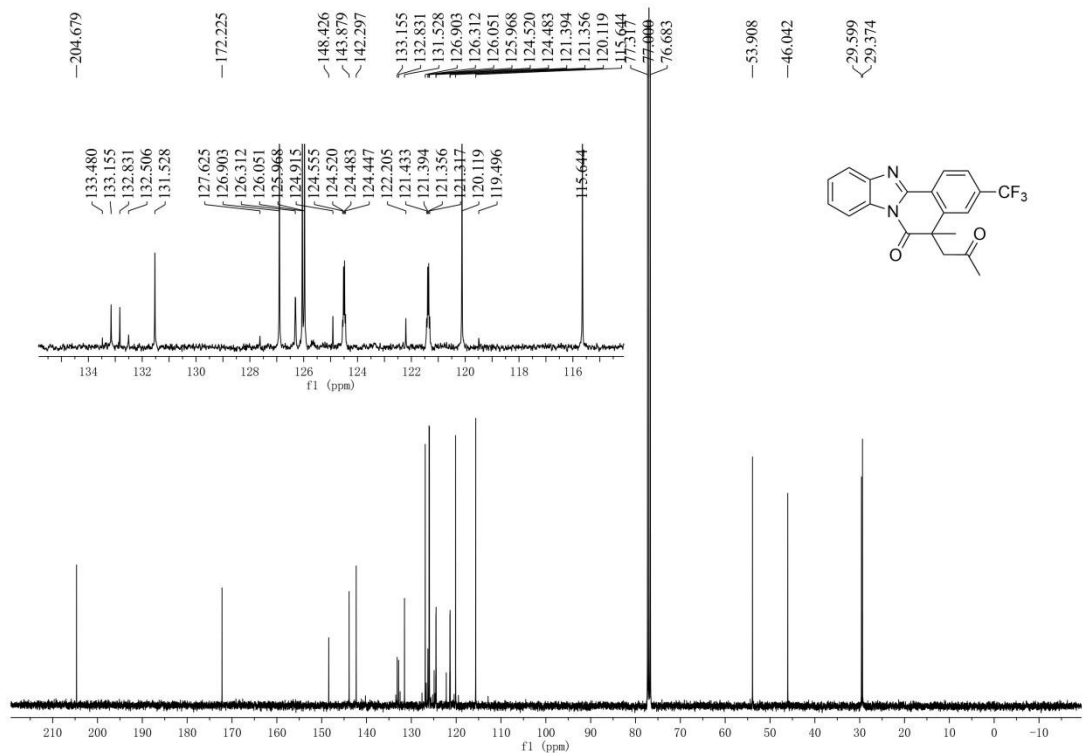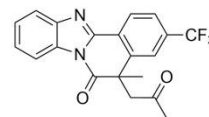

-62.786

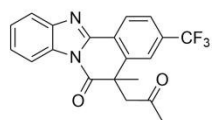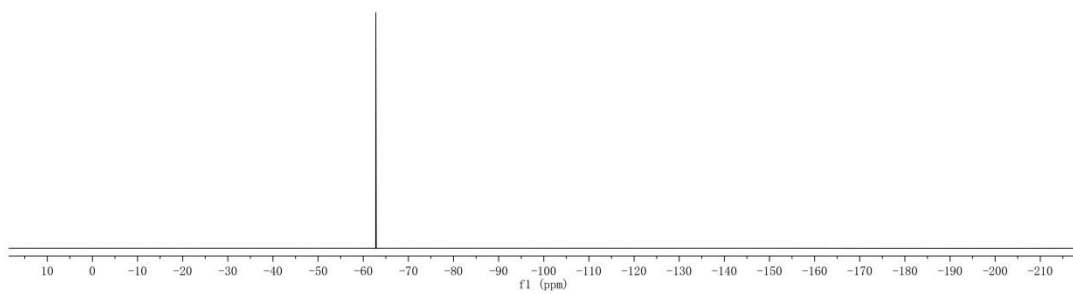

**2-Methoxy-5-methyl-5-(2-oxopropyl)benzo[4,5]imidazo[2,1-*a*]isoquinolin-6(5*H*)-one (3afa) and 4-Methoxy-5-methyl-5-(2-oxopropyl)benzo[4,5]imidazo[2,1-*a*]isoquinolin-6(5*H*)-one (3afa')**

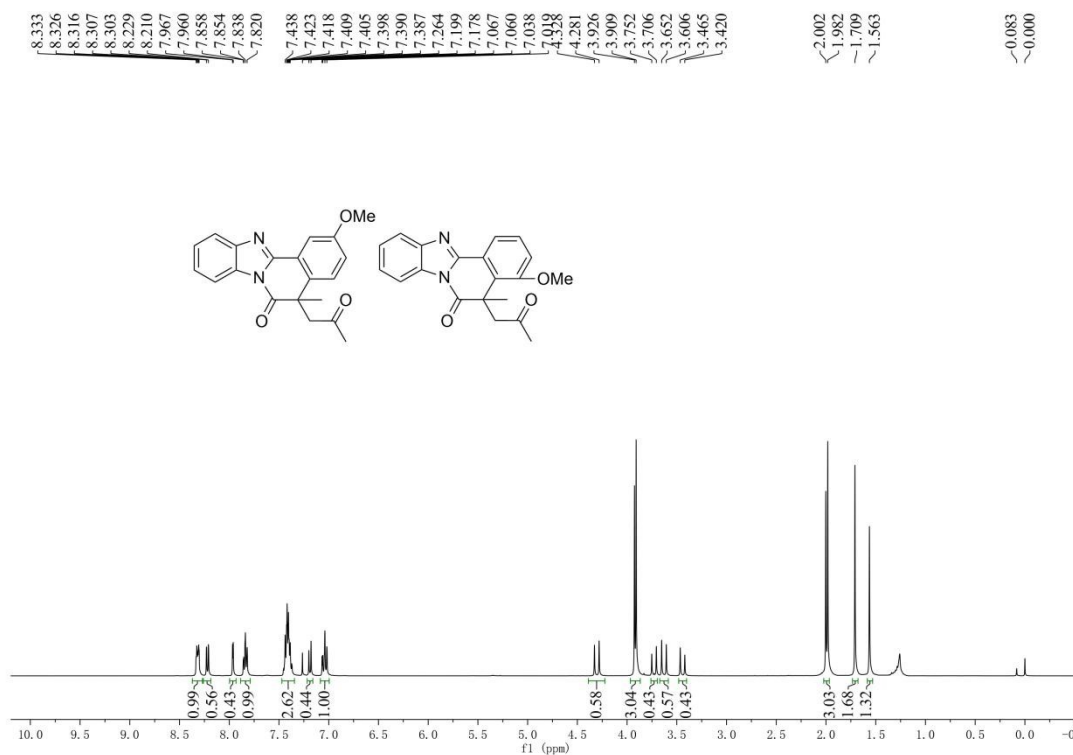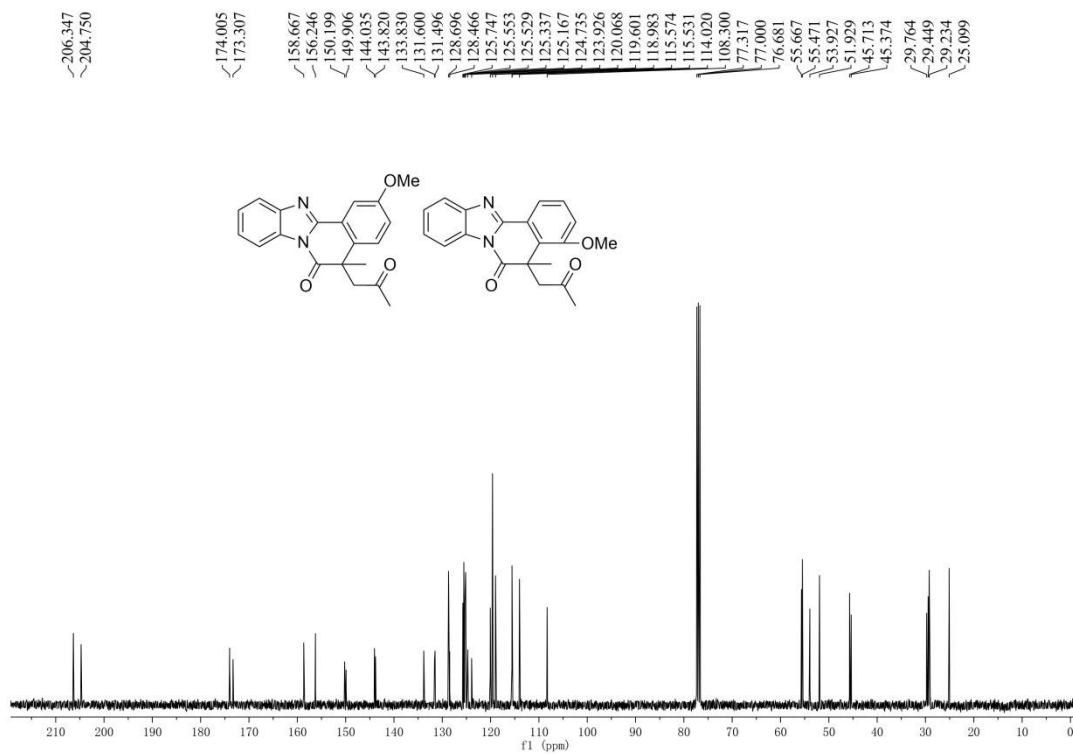

**2-Chloro-5-methyl-5-(2-oxopropyl)benzo[4,5]imidazo[2,1-*a*]isoquinolin-6(5*H*)-one (3ga)**

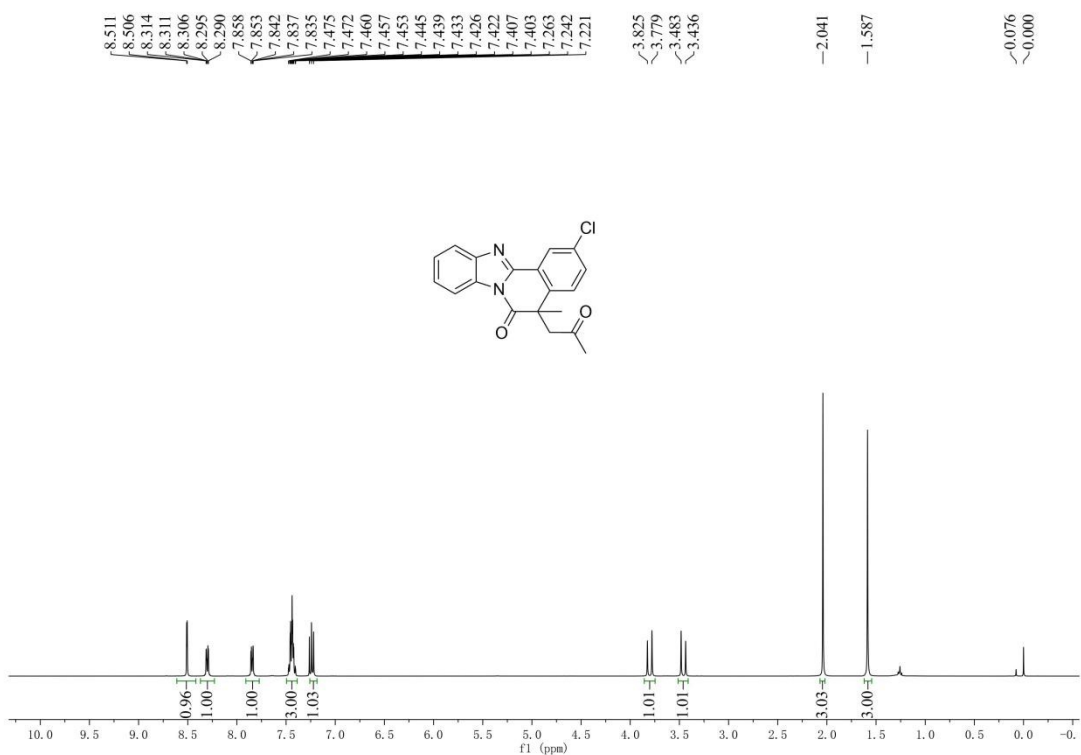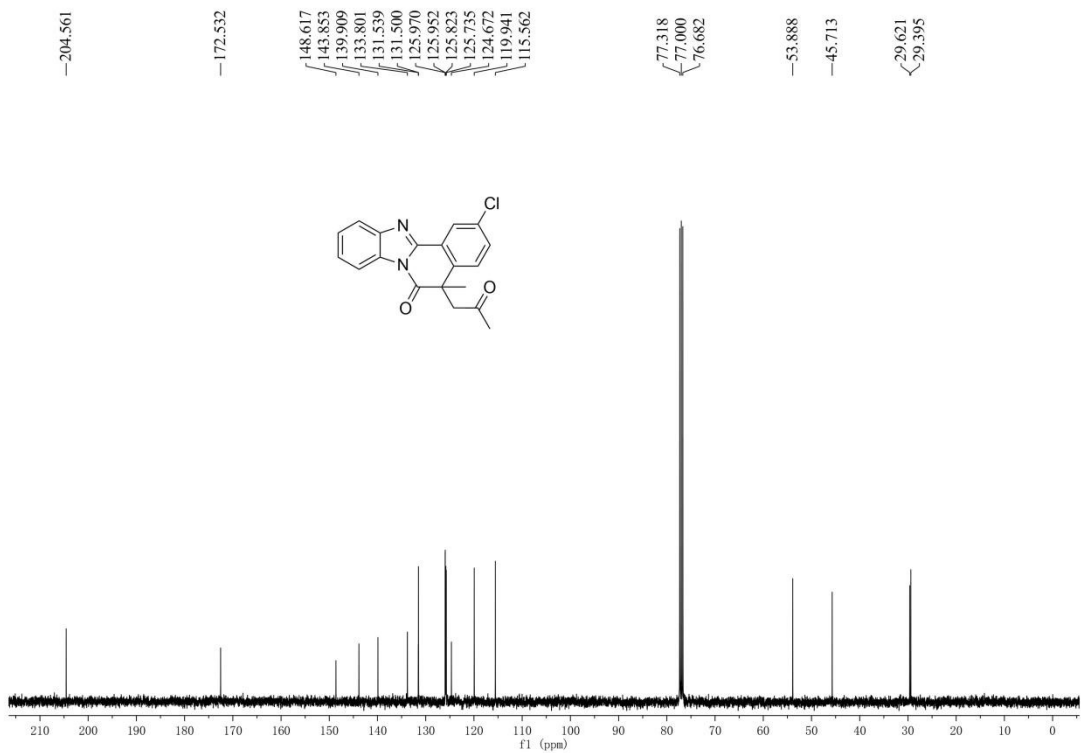

**4-Chloro-5-methyl-5-(2-oxopropyl)benzo[4,5]imidazo[2,1-*a*]isoquinolin-6(5*H*)-one (3aga')**

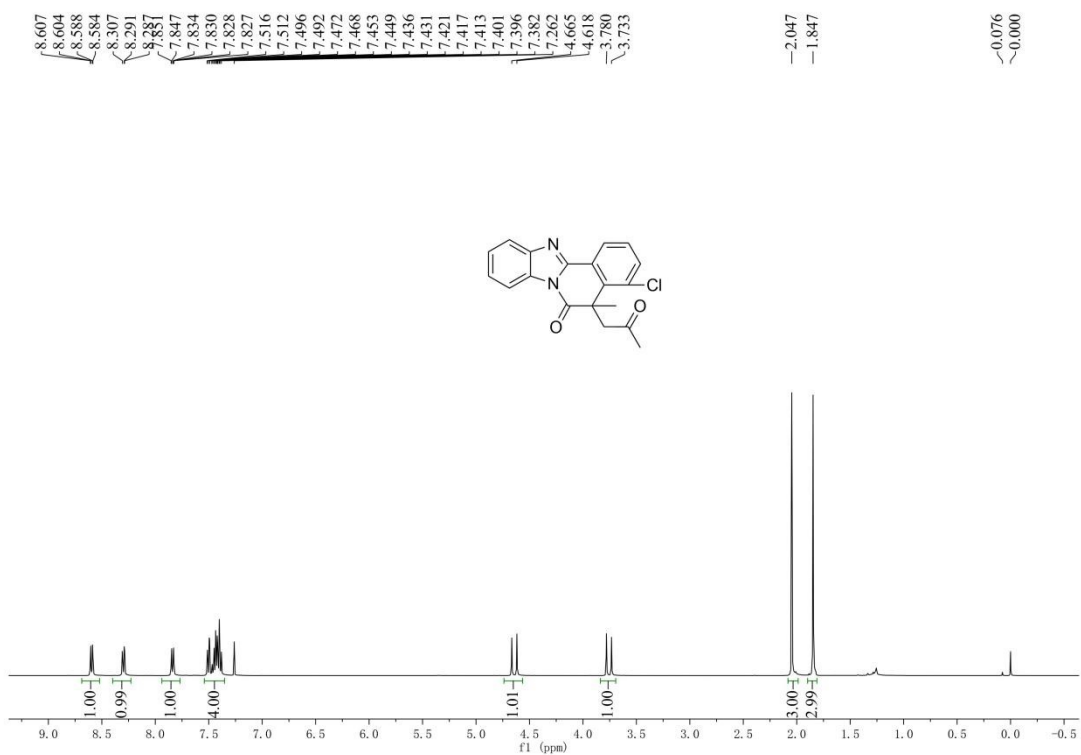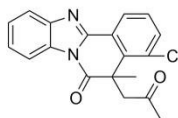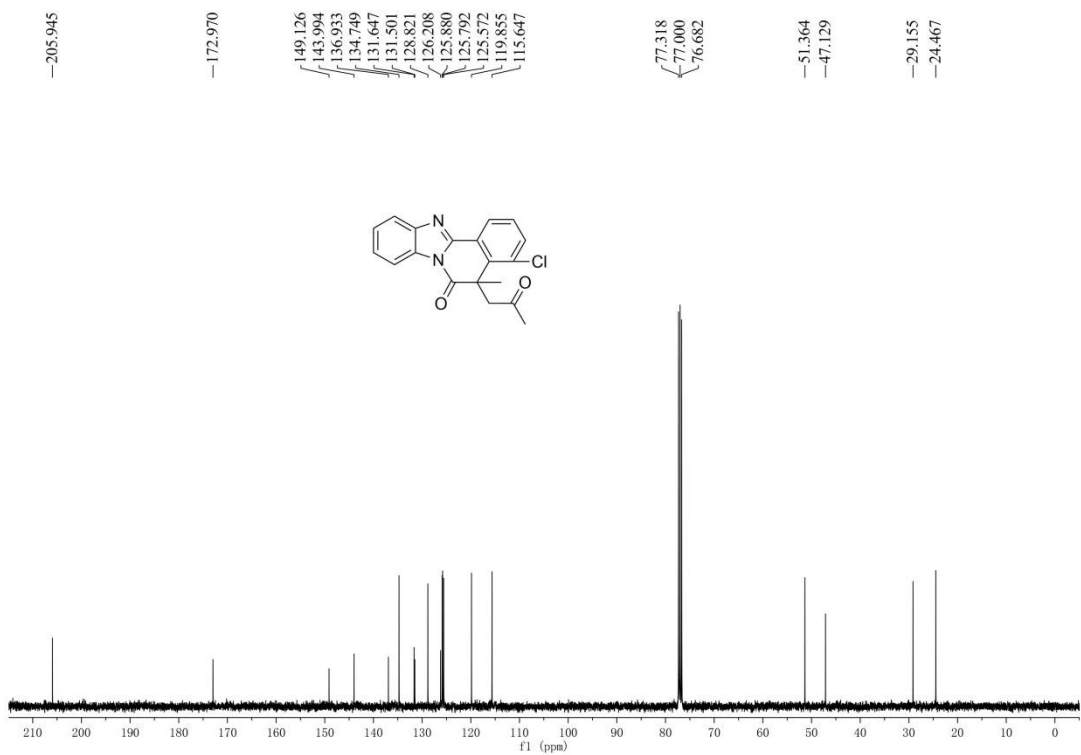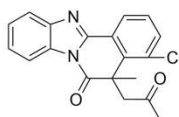

**1,5-Dimethyl-5-(2-oxopropyl)benzo[4,5]imidazo[2,1-*a*]isoquinolin-6(5*H*)-one  
(3aha)**

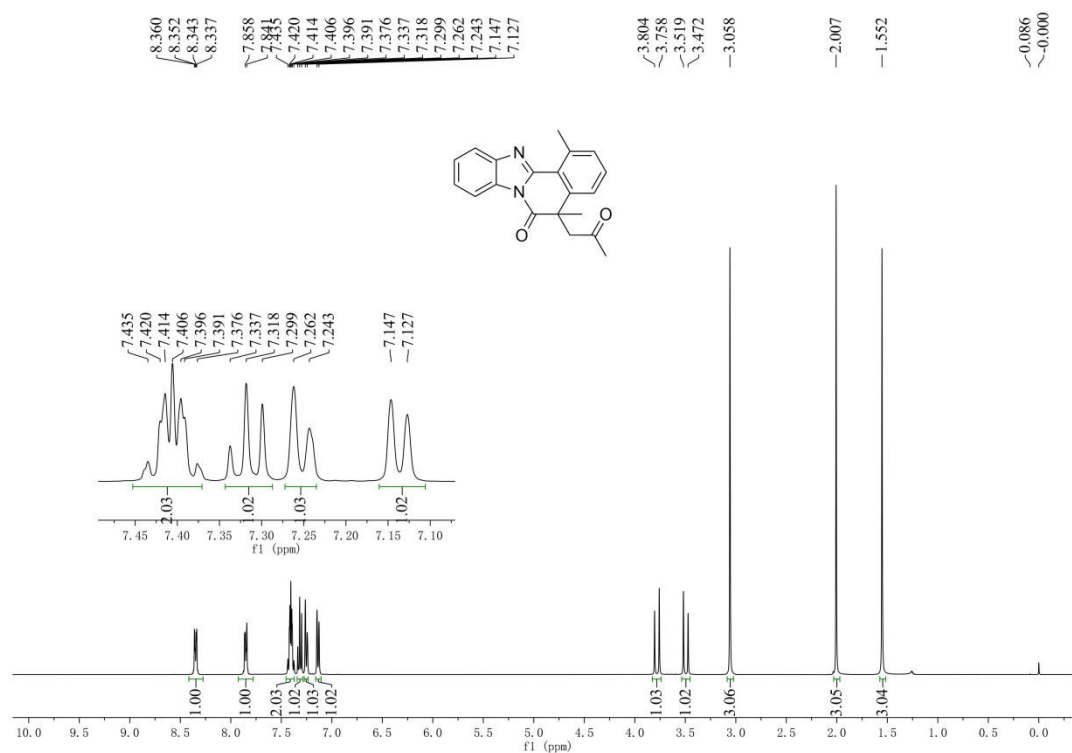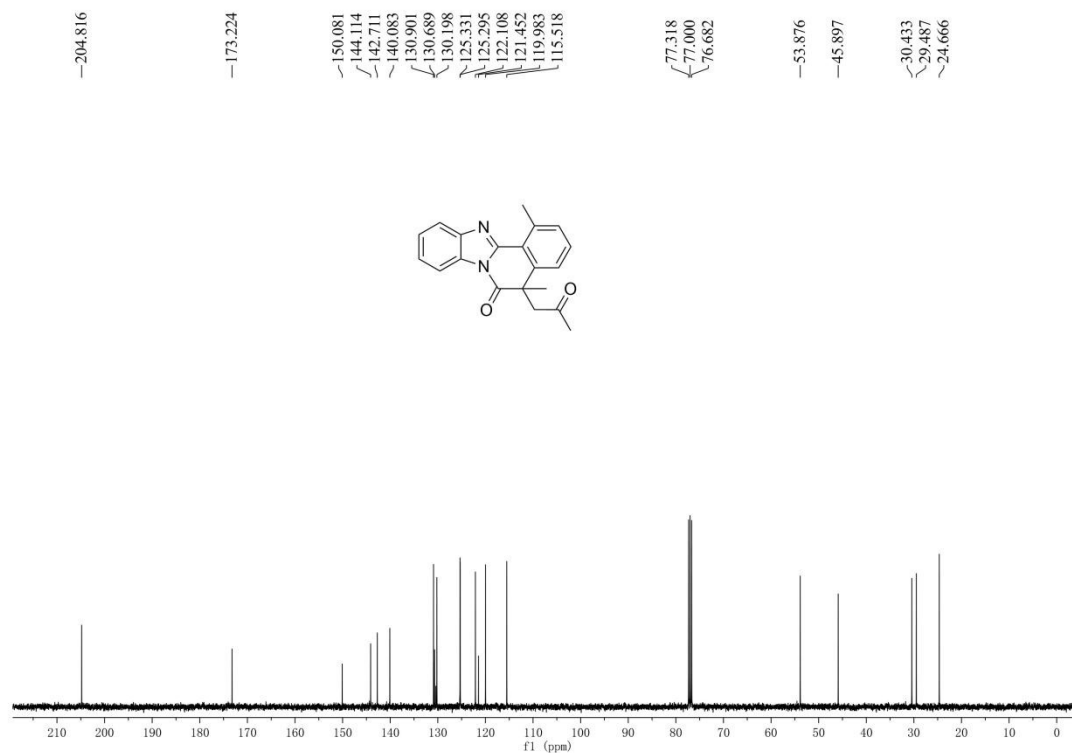



**1-Chloro-5-methyl-5-(2-oxopropyl)benzo[4,5]imidazo[2,1-a]isoquinolin-6(5H)-one (3aia)**

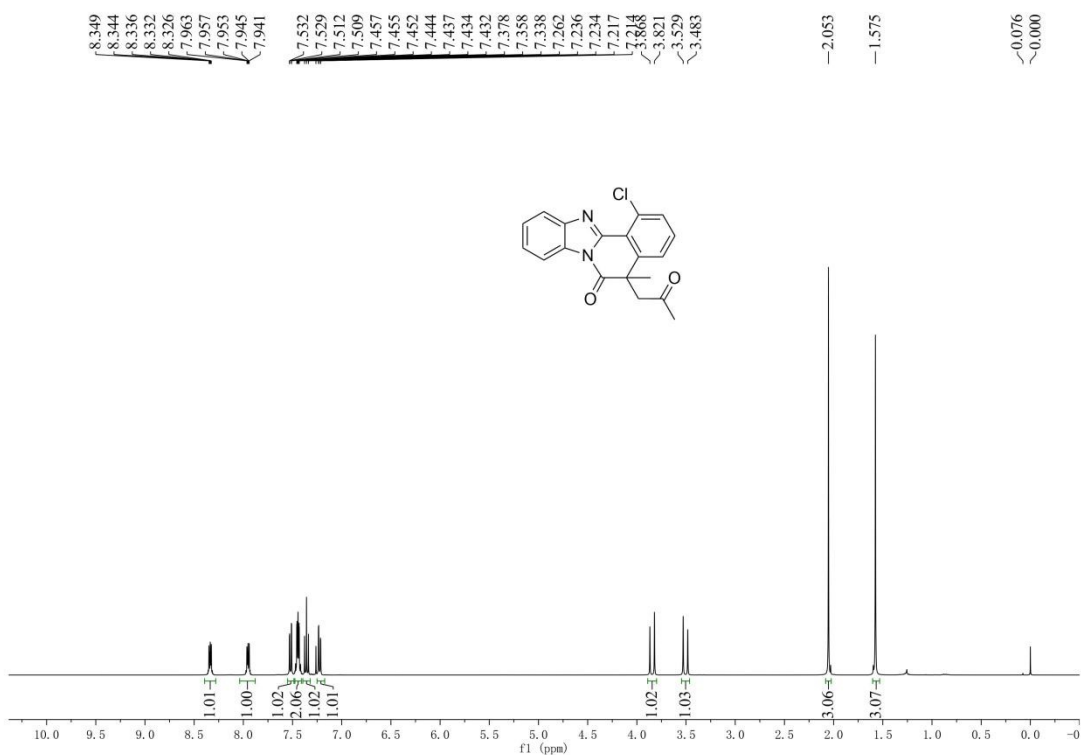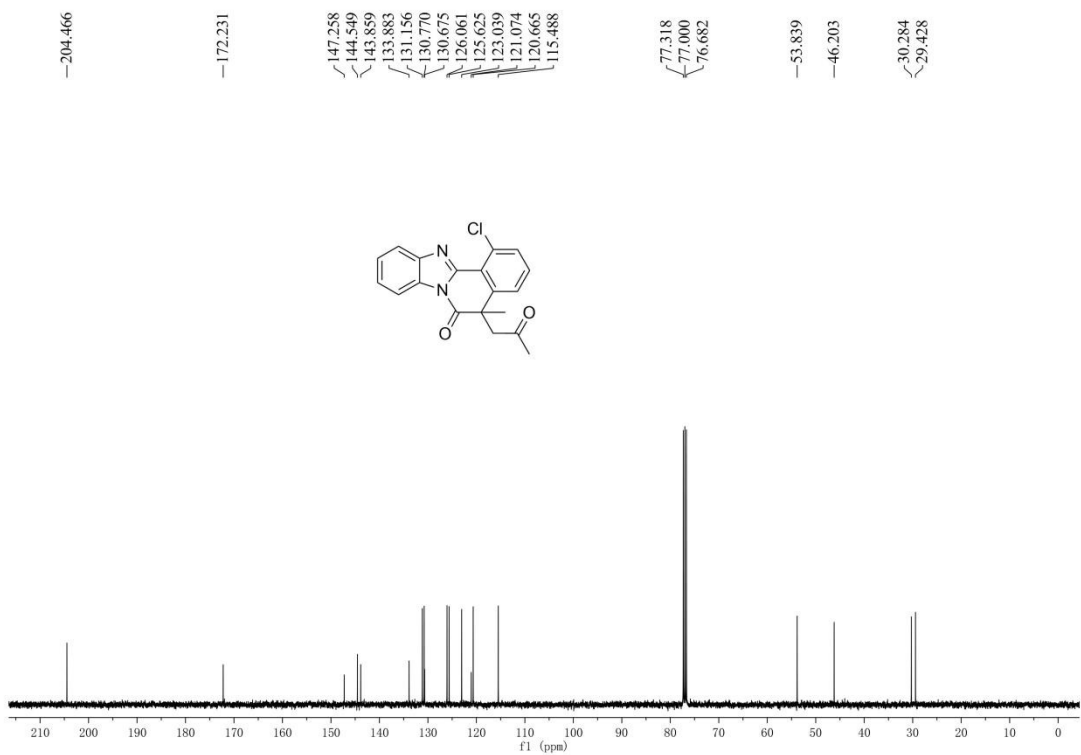

**7-Methyl-7-(2-oxopropyl)benzo[g]benzo[4,5]imidazo[2,1-*a*]isoquinolin-6(7*H*)-one  
(3a<sub>ja</sub>)**

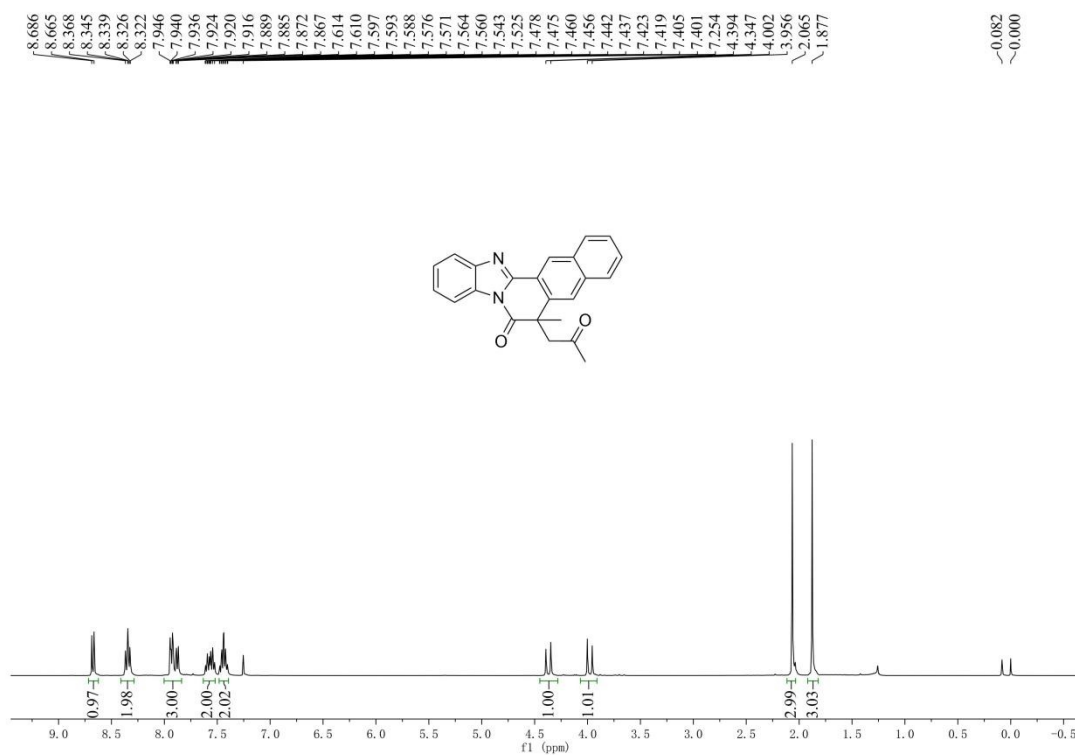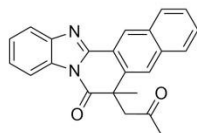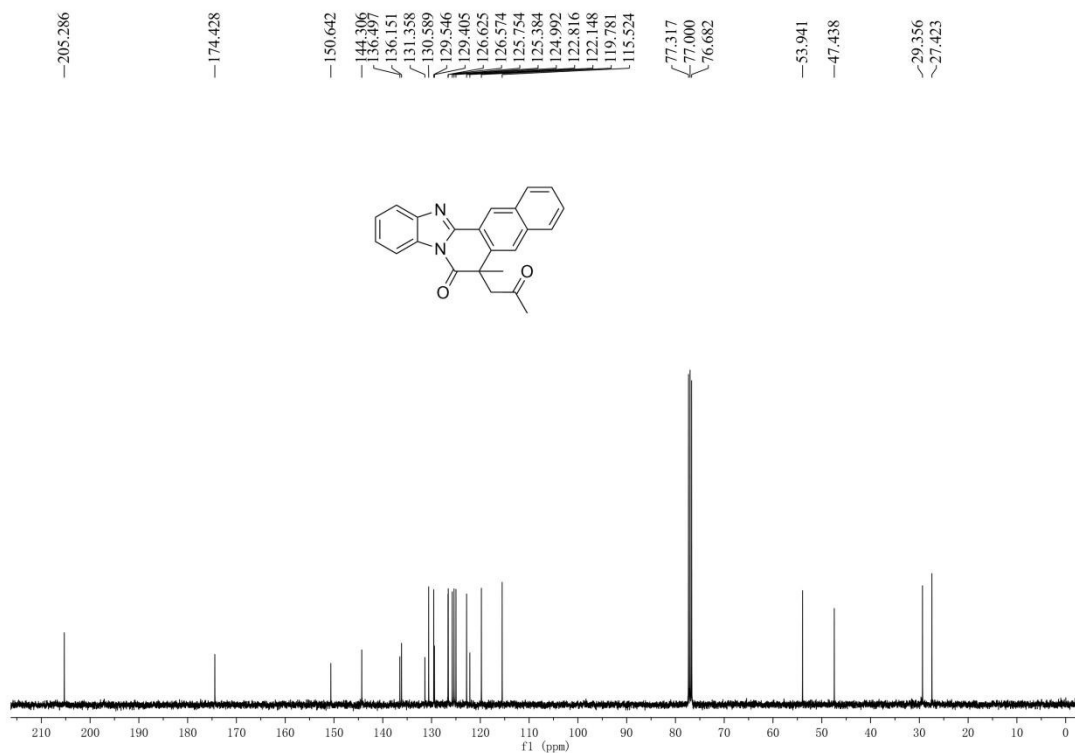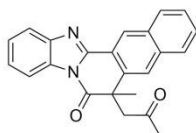

**4-Methyl-4-(2-oxopropyl)benzo[4,5]imidazo[1,2-*a*]thieno[2,3-*c*]pyridin-5(4*H*)-one**  
**(3aka)**

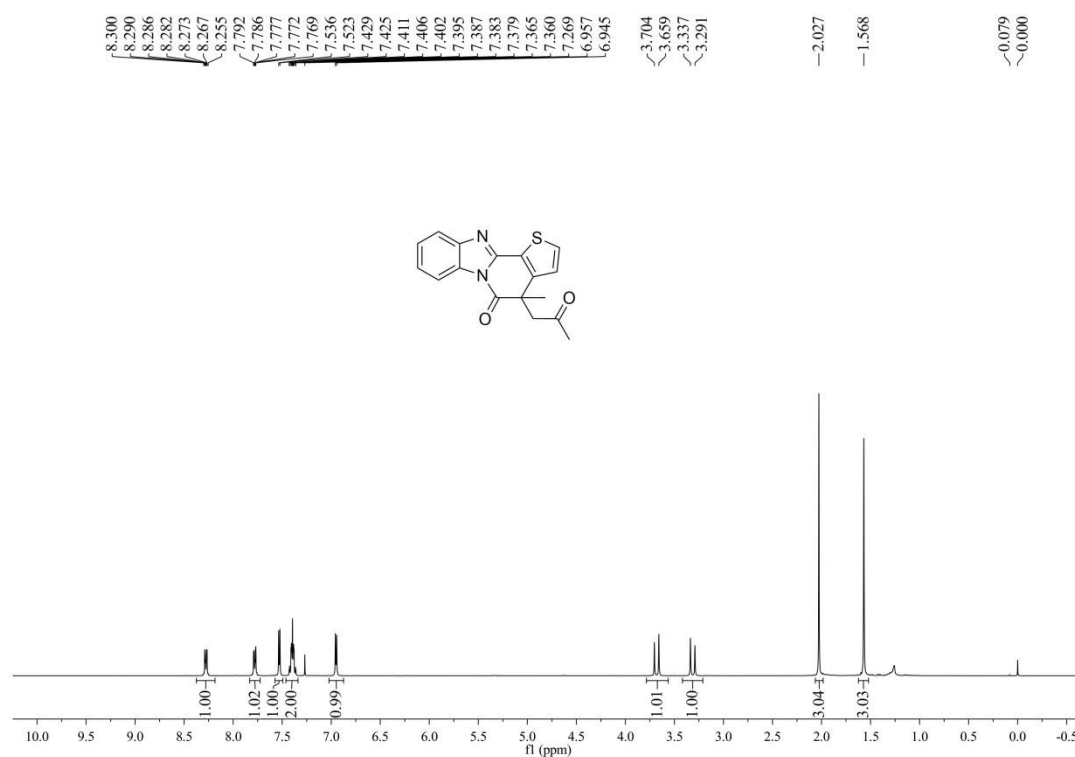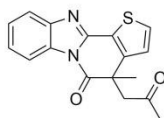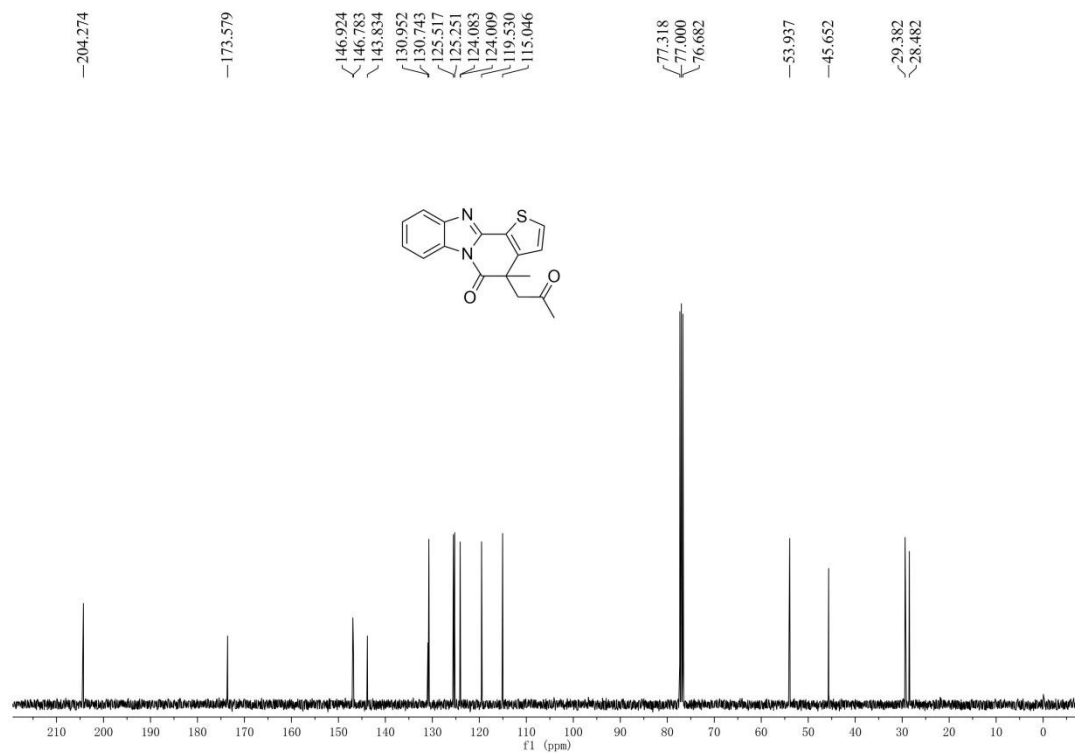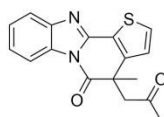

**4-Methyl-4-(2-oxopropyl)benzo[4,5]imidazo[1,2-*a*]thieno[3,4-*c*]pyridin-5(4*H*)-one  
(3a)**

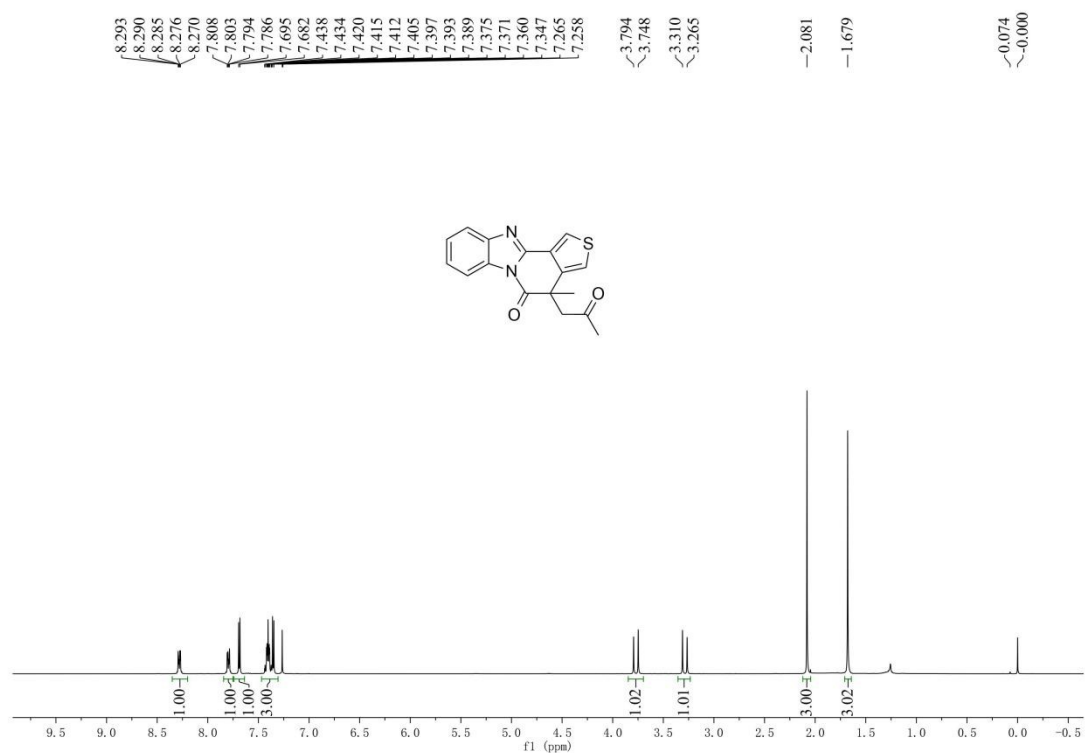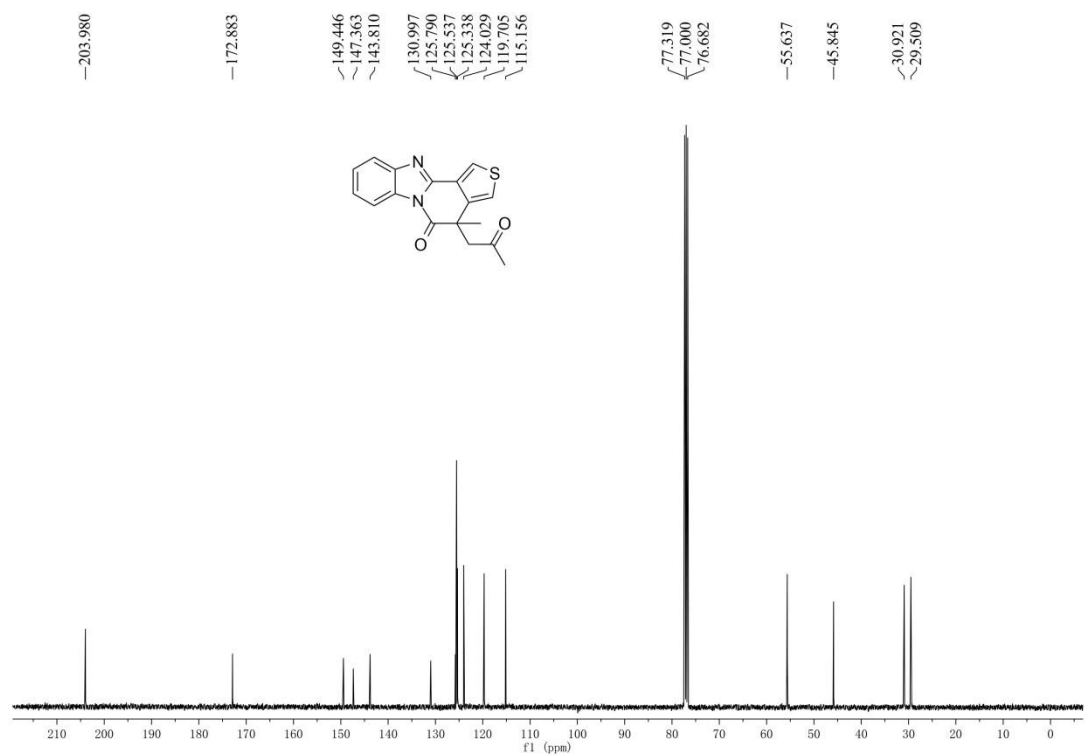

**5,9,10-Trimethyl-5-(2-oxopropyl)benzo[4,5]imidazo[2,1-a]isoquinolin-6(5H)-one  
(3ana)**

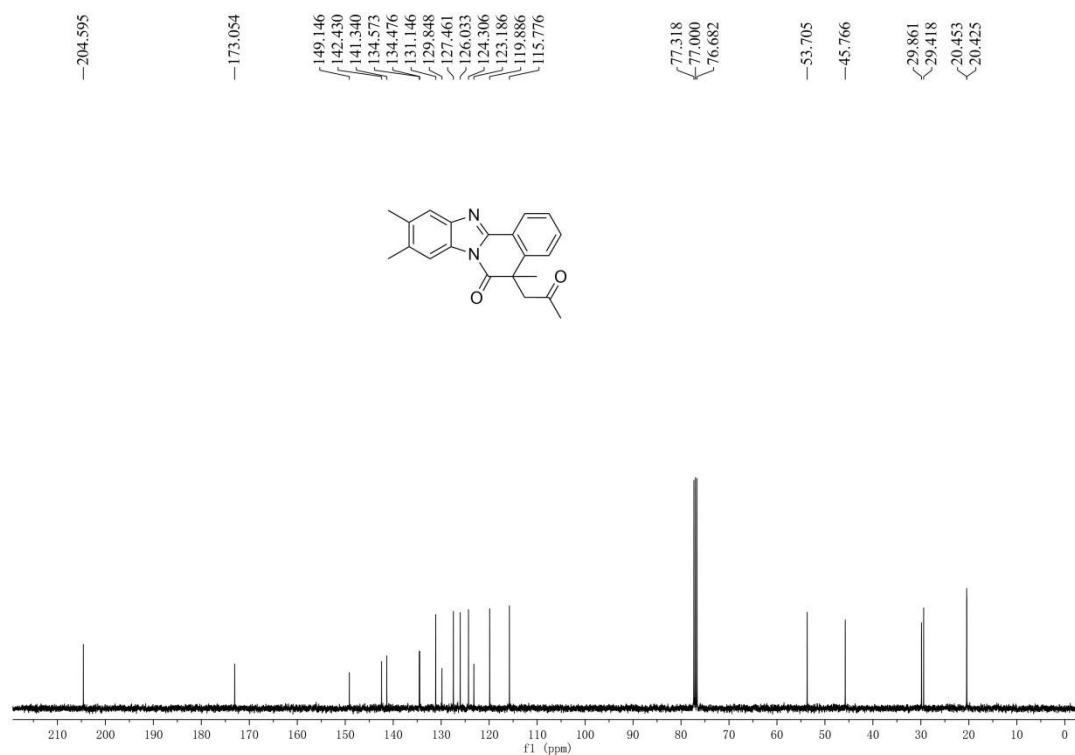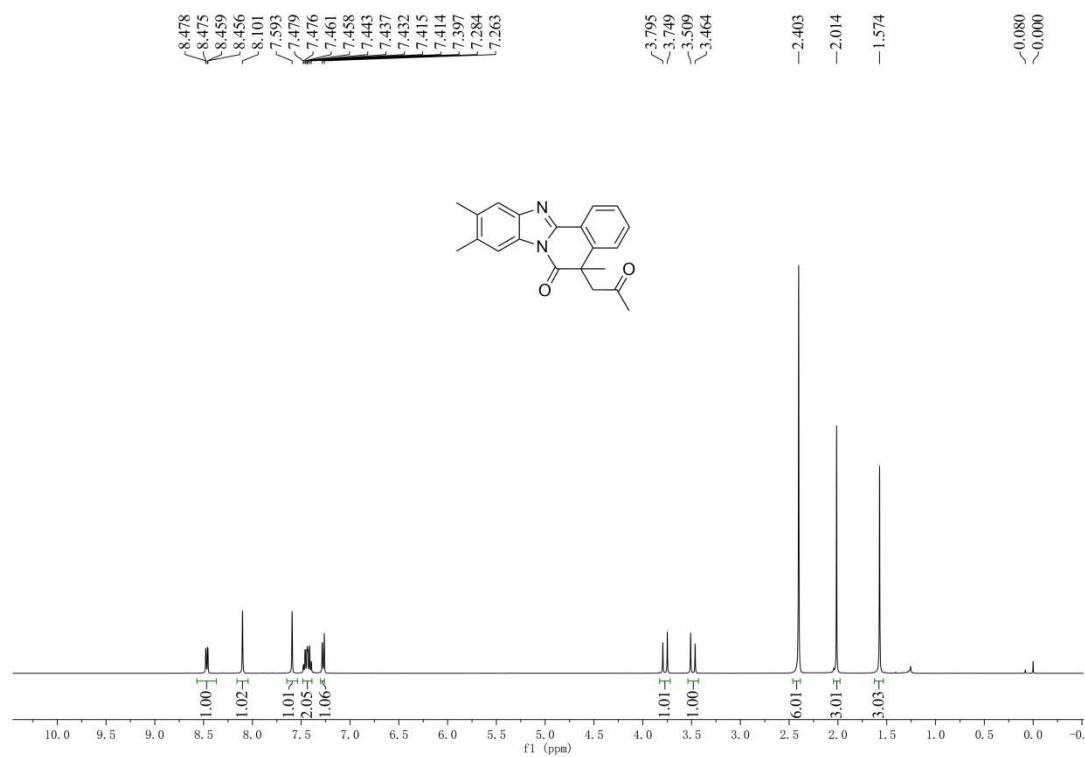

**9,10-Dichloro-5-methyl-5-(2-oxopropyl)benzo[4,5]imidazo[2,1-a]isoquinolin-6(5H)-one (3a0a)**

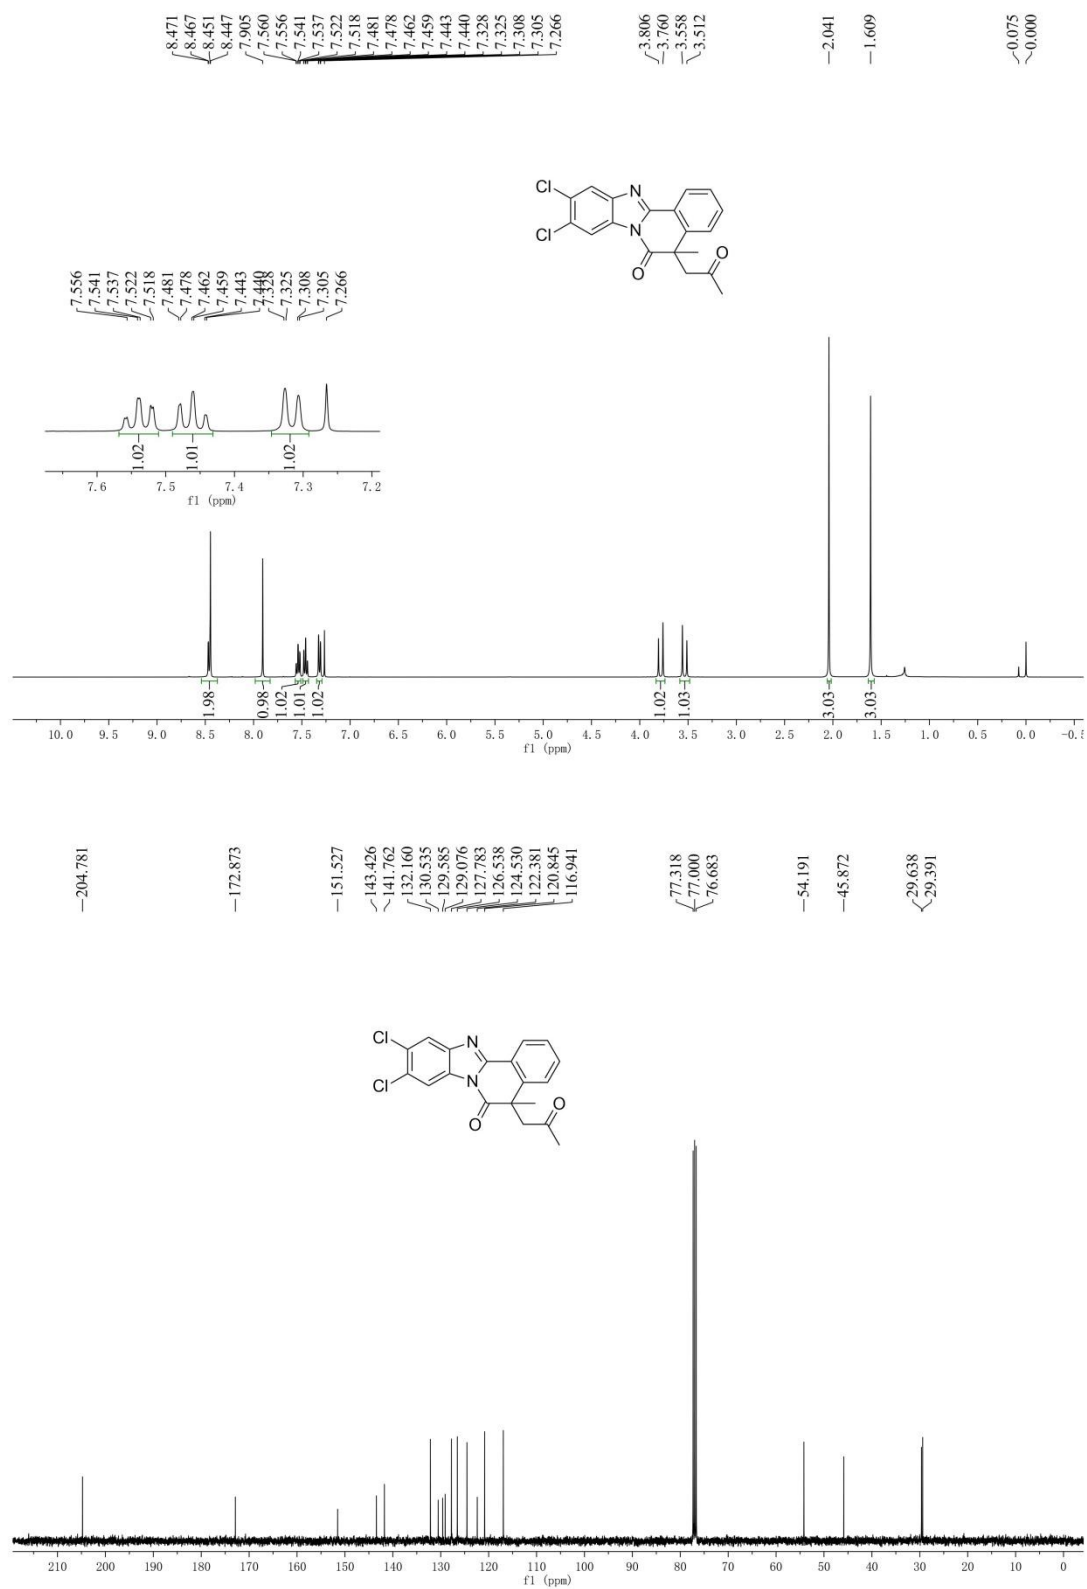

**3-Methoxy-5,12-dimethyl-5-(2-oxobutyl)indolo[2,1-a]isoquinolin-6(5H)-one (3ab)**

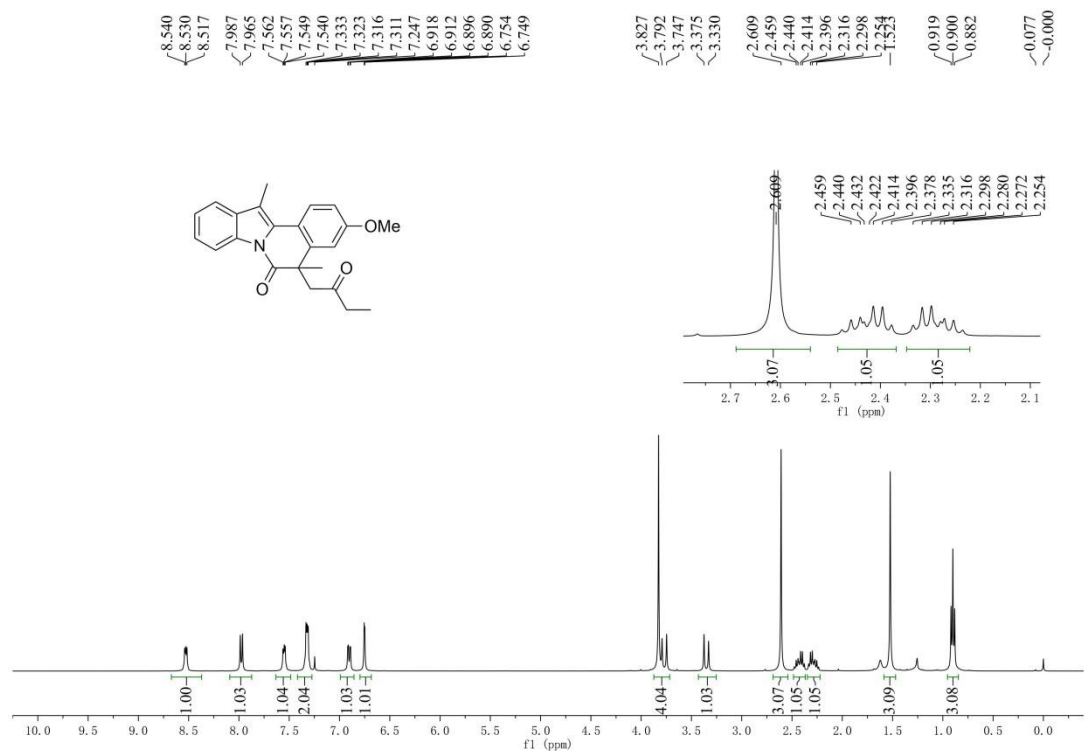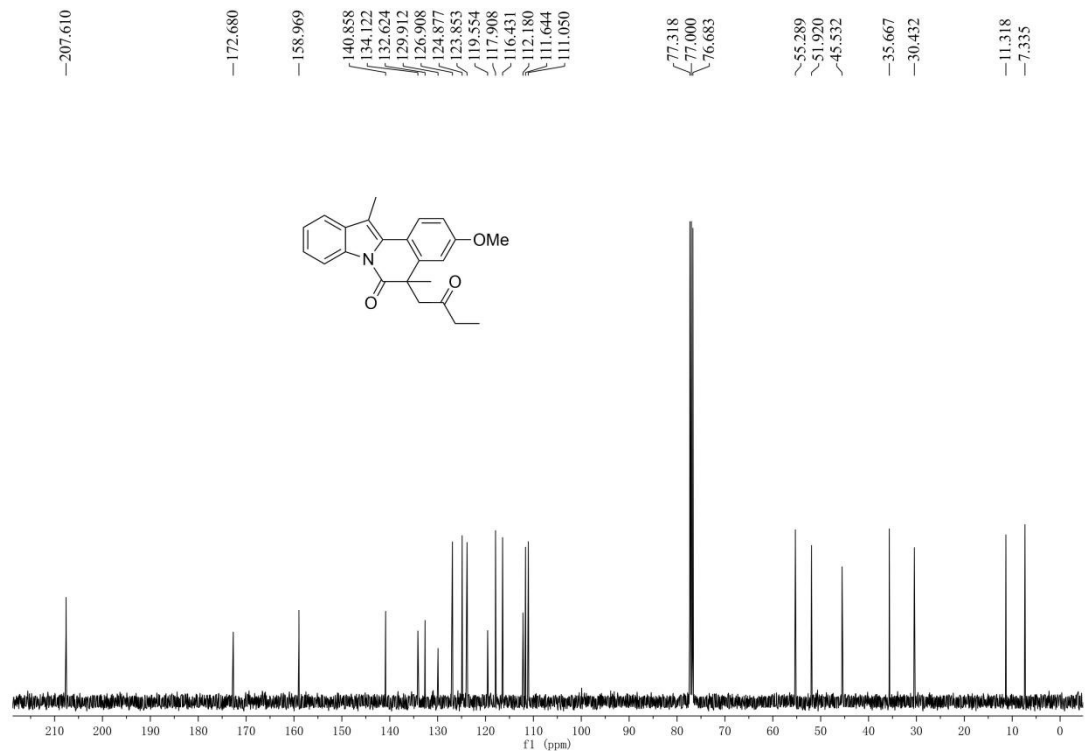

**3-Methoxy-5,12-dimethyl-5-(2-oxopentyl)indolo[2,1-a]isoquinolin-6(5H)-one (3ac)**

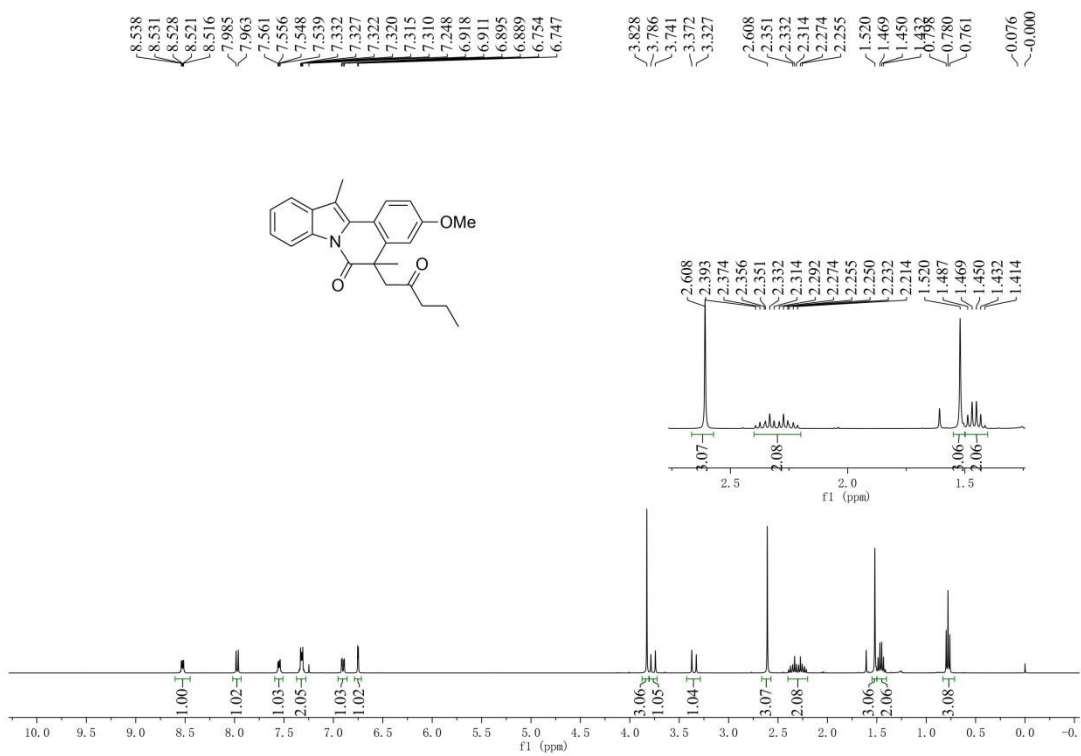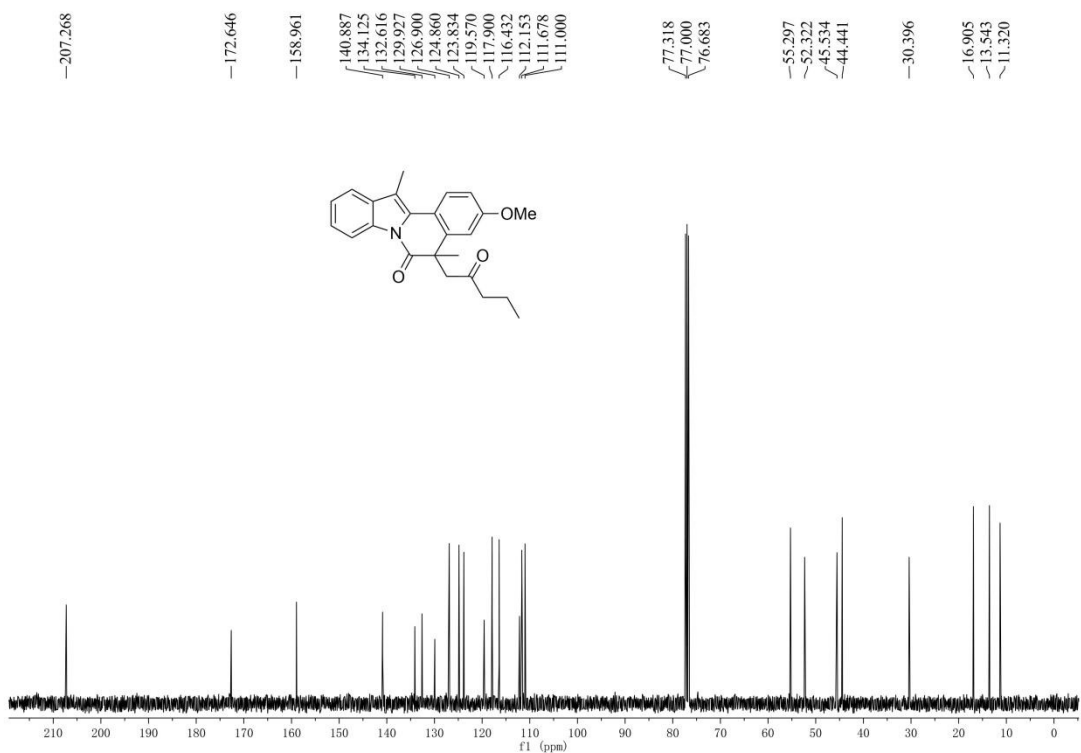

**3-Methoxy-5,12-dimethyl-5-(3-methyl-2-oxobutyl)indolo[2,1-*a*]isoquinolin-6(5*H*)-one (3ad)**



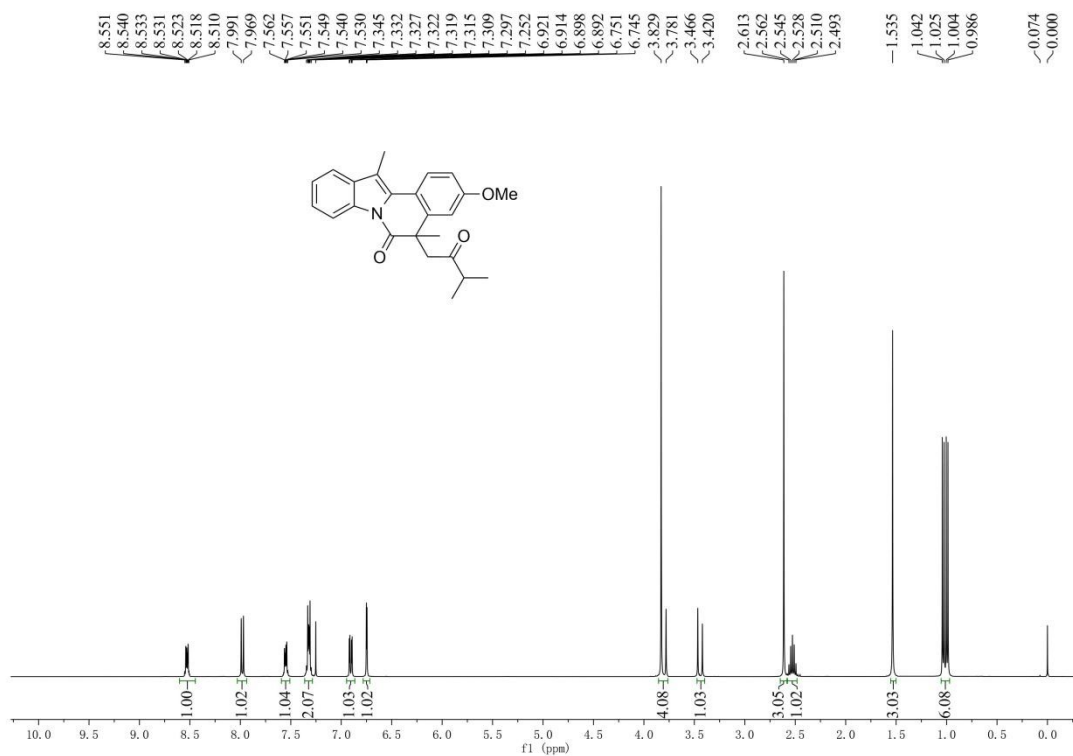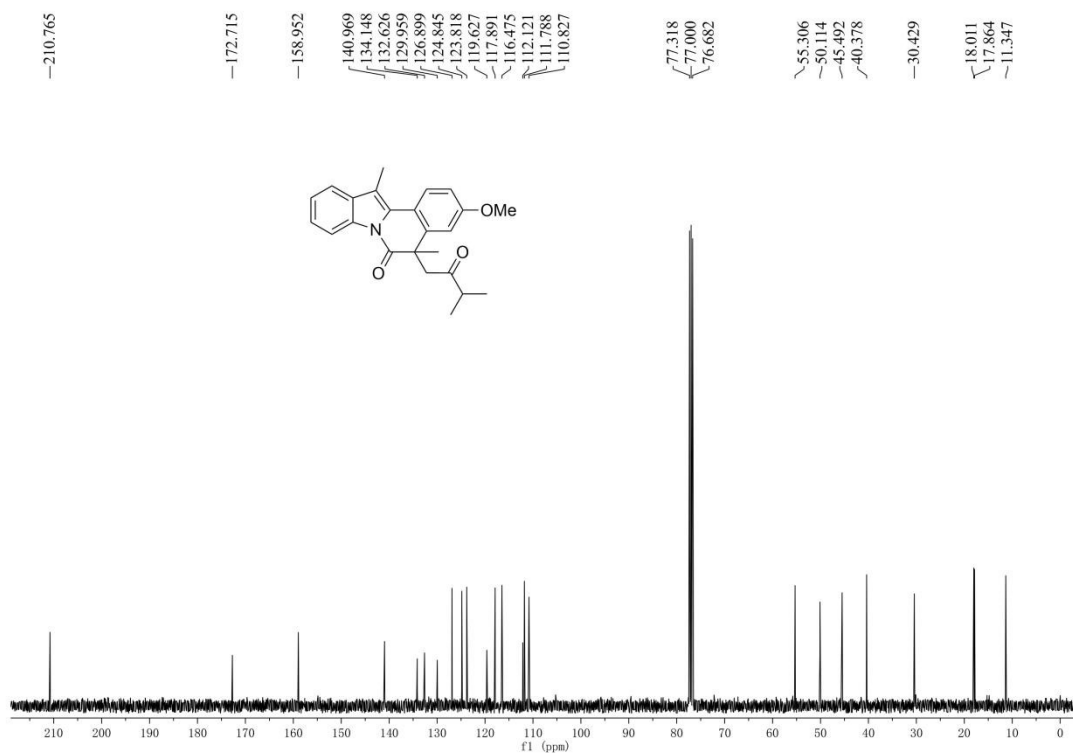

**3-Methoxy-5,12-dimethyl-5-(2-oxohexyl)indolo[2,1-*a*]isoquinolin-6(5*H*)-one (3ae)**

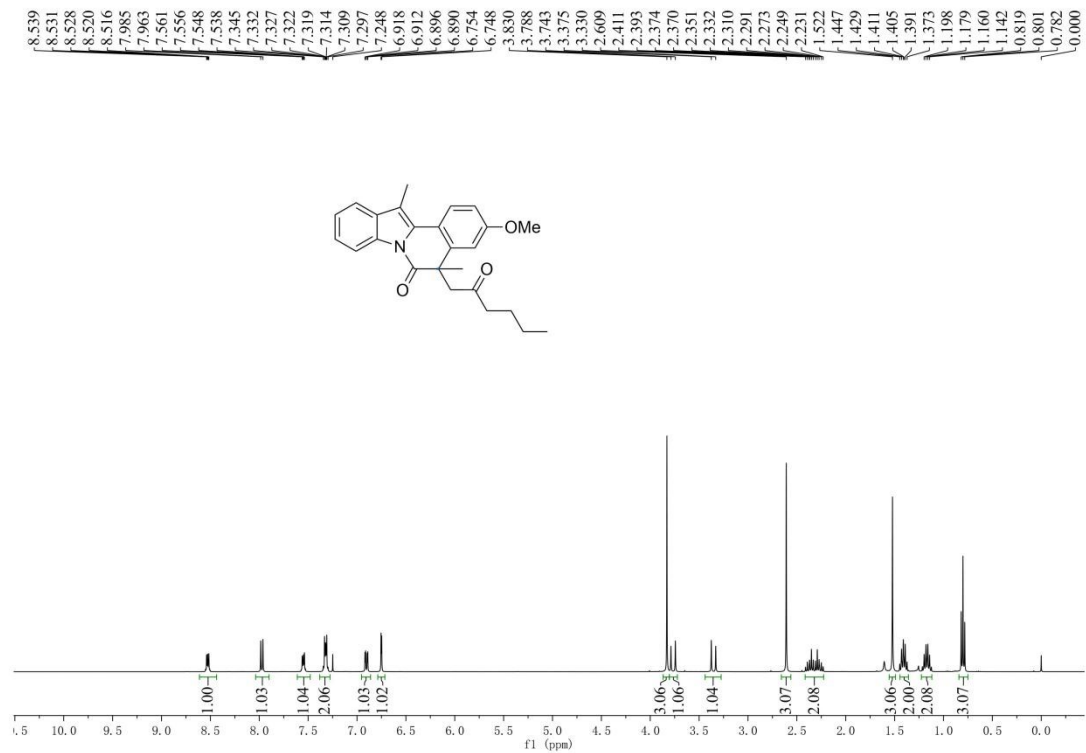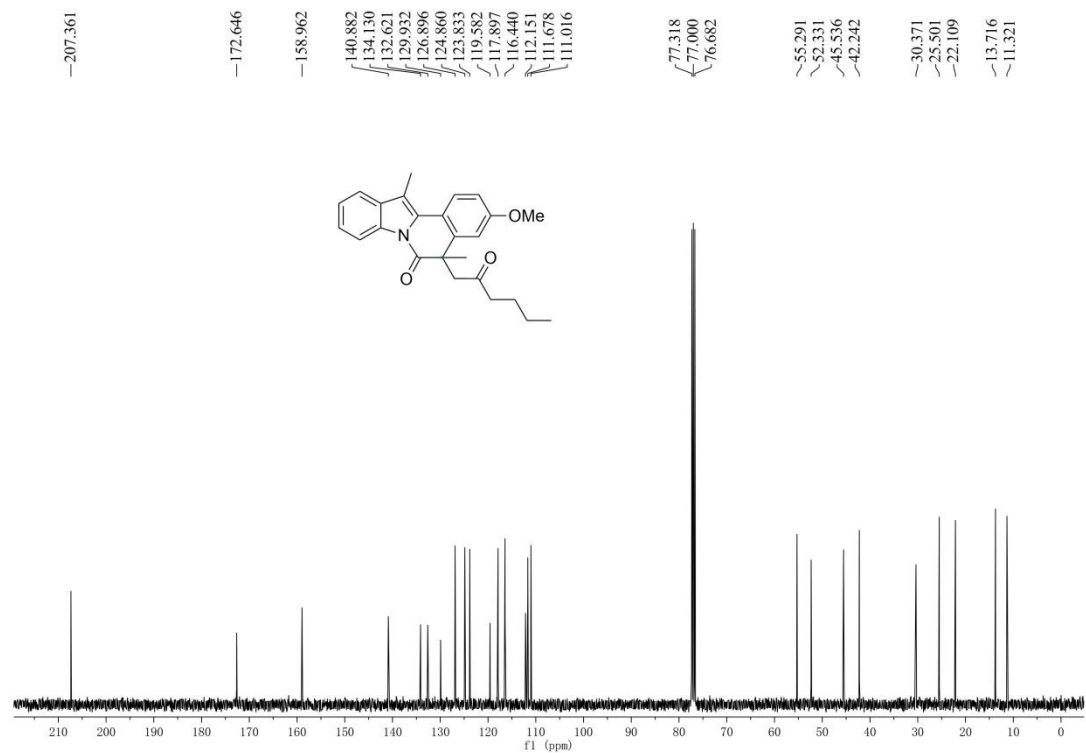

**3-Methoxy-5,12-dimethyl-5-(2-oxoheptyl)indolo[2,1-a]isoquinolin-6(5H)-one (3af)**

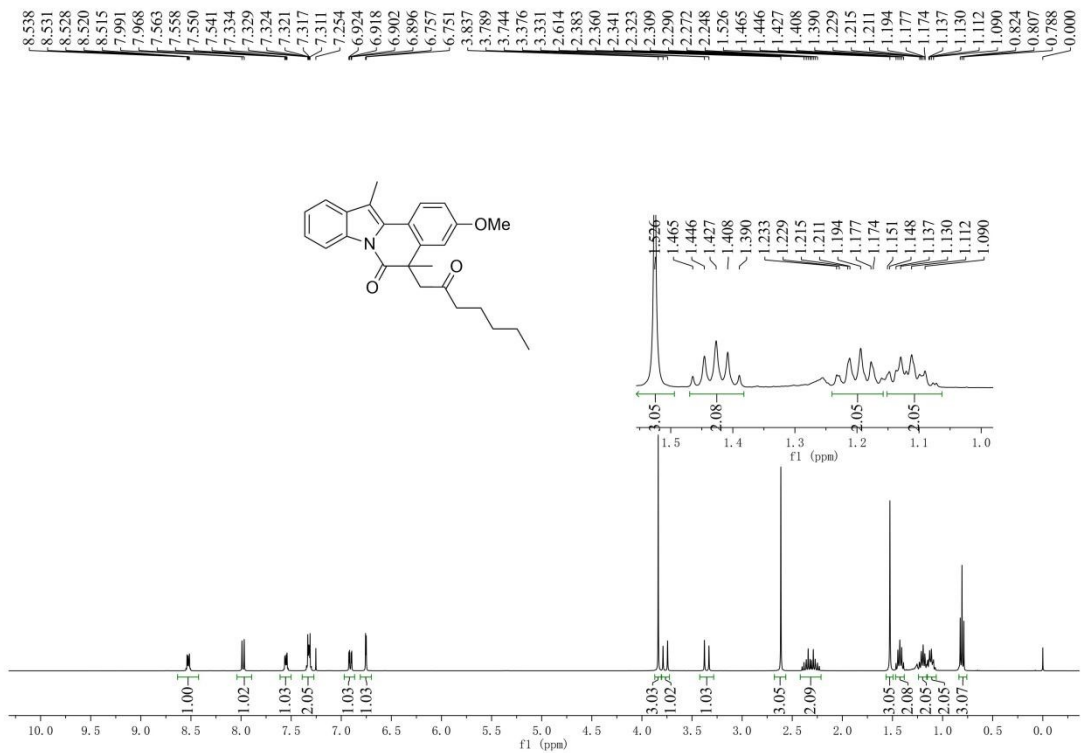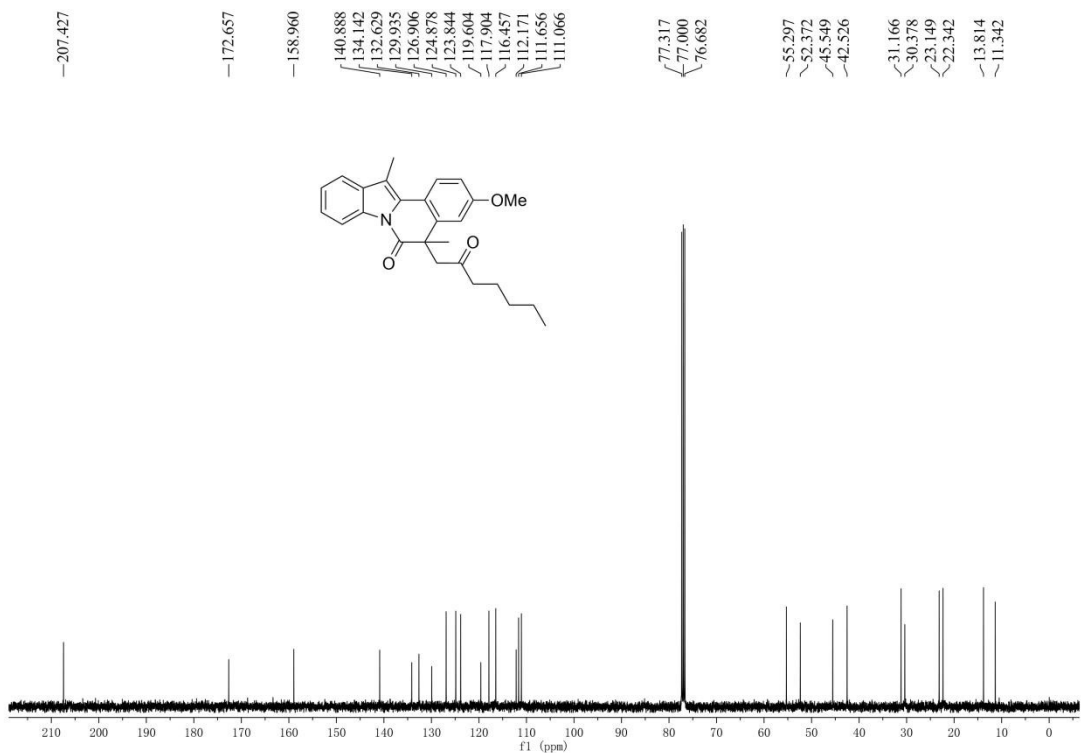

**3-Methoxy-5,12-dimethyl-5-(4-methyl-2-oxohexyl)indolo[2,1-*a*]isoquinolin-6(5*H*)-one (3ag)**

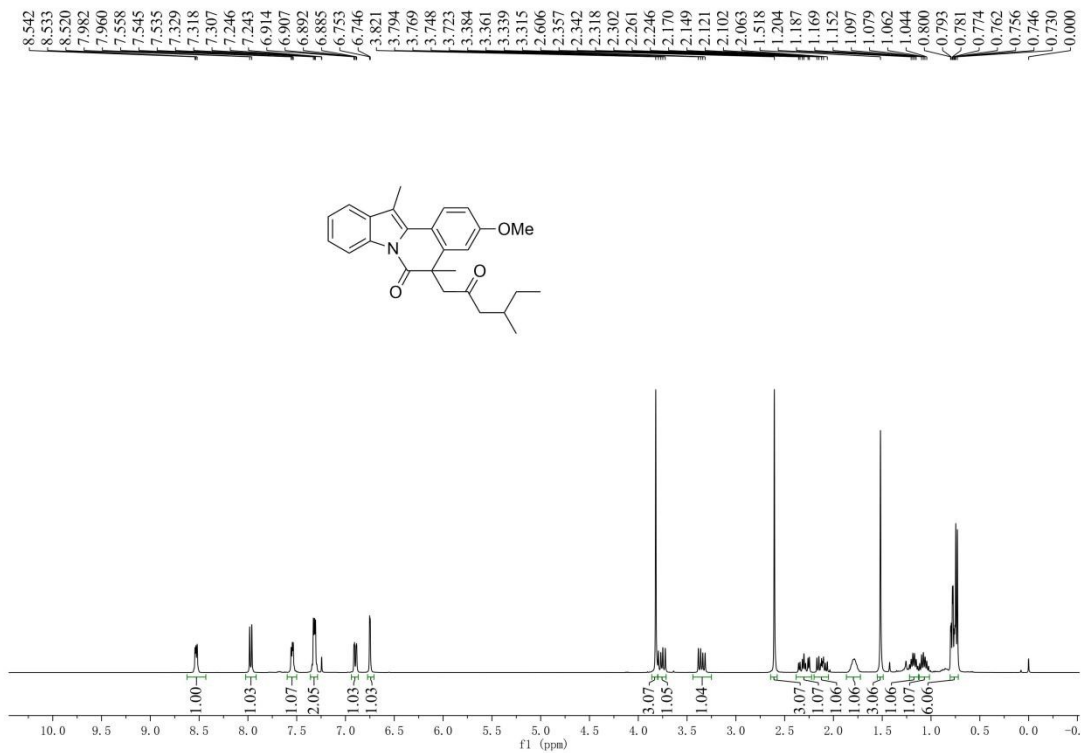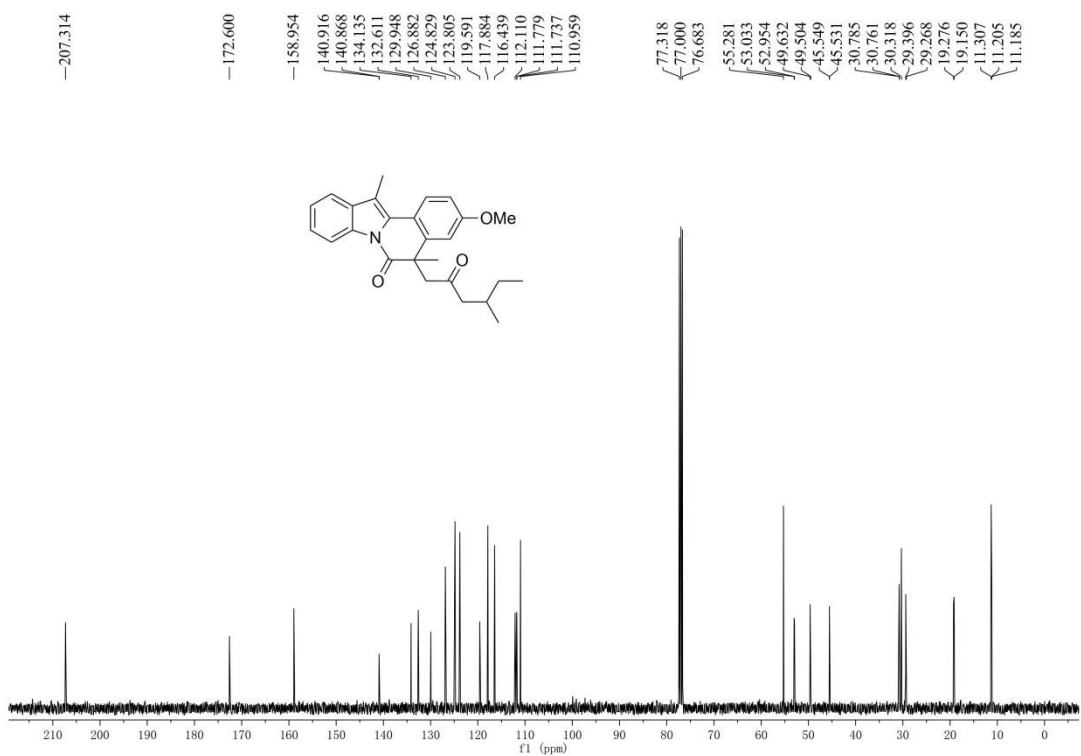

**3-Methoxy-5,12-dimethyl-5-(2-oxo-2-phenylethyl)indolo[2,1-a]isoquinolin-6(5H)-one (3ah)**

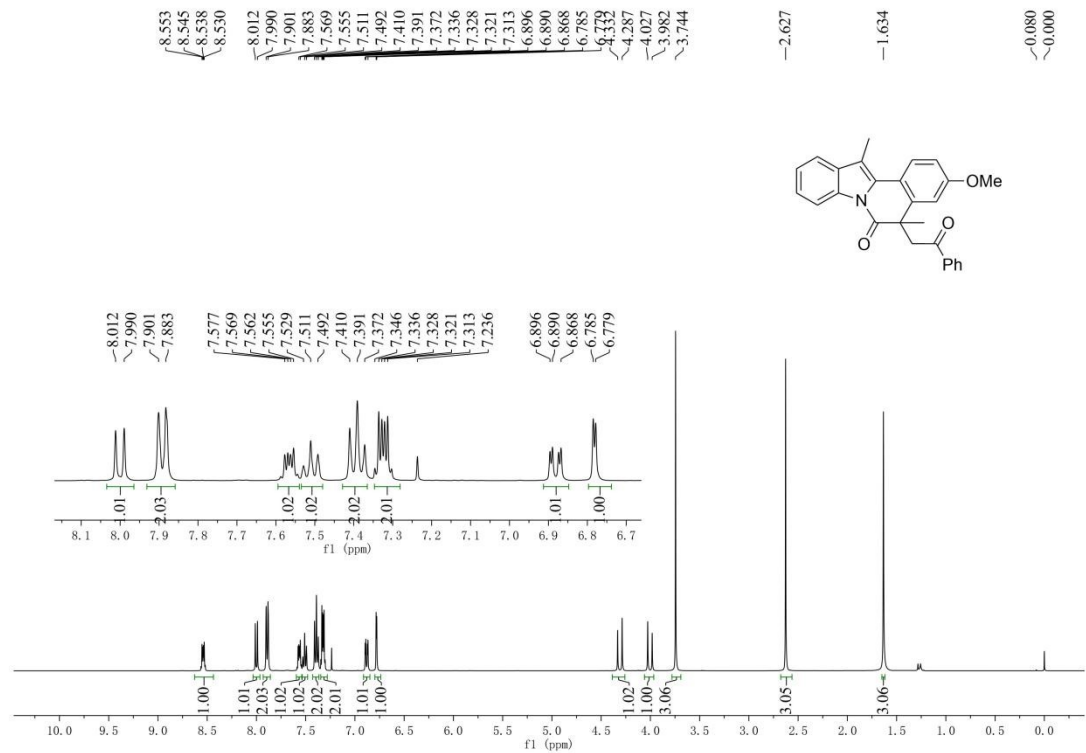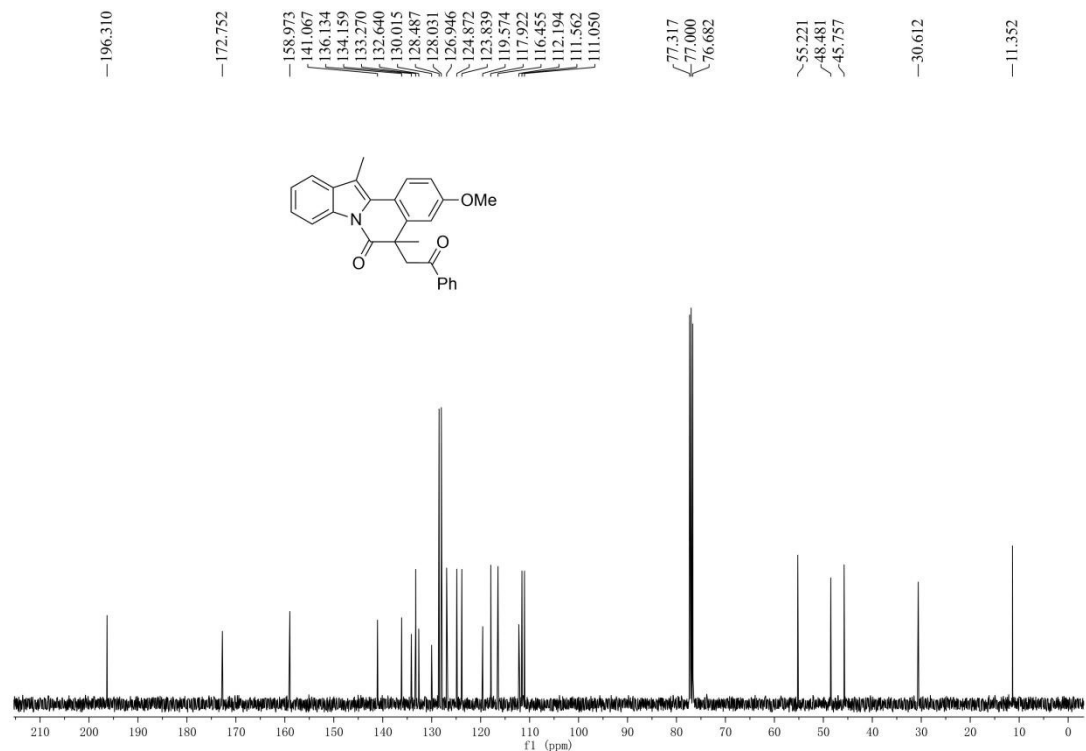

**3-Methoxy-5-(2-(4-methoxyphenyl)-2-oxoethyl)-5,12-dimethylindolo[2,1-a]isoquinolin-6(5H)-one (3ai)**

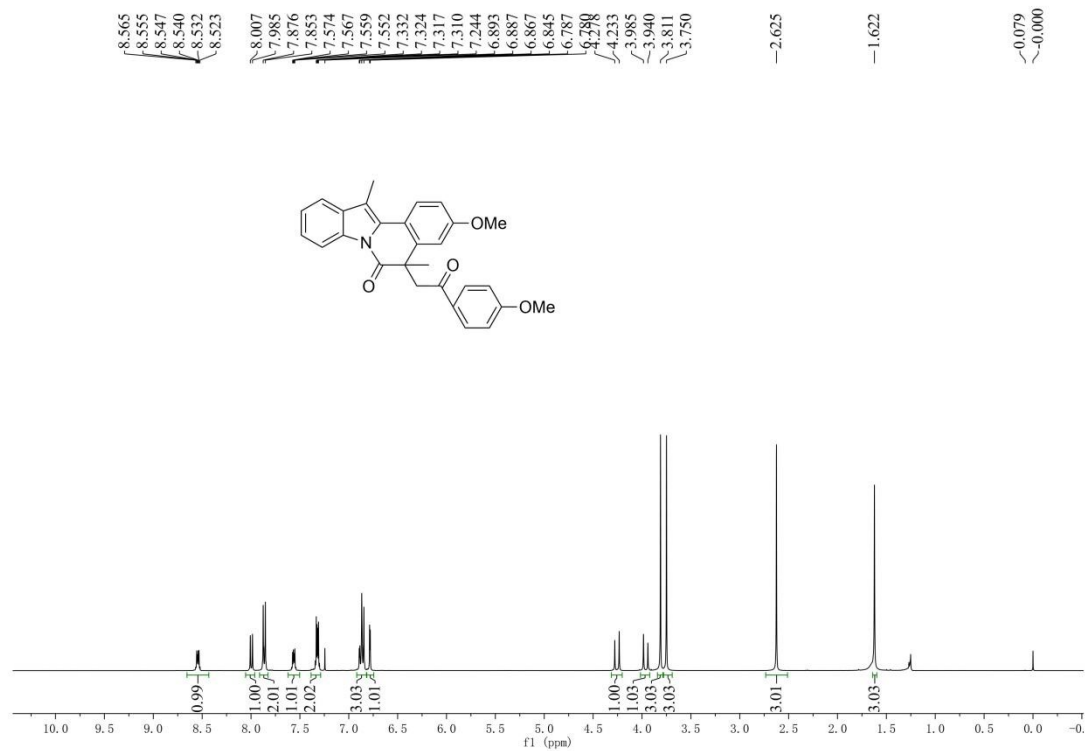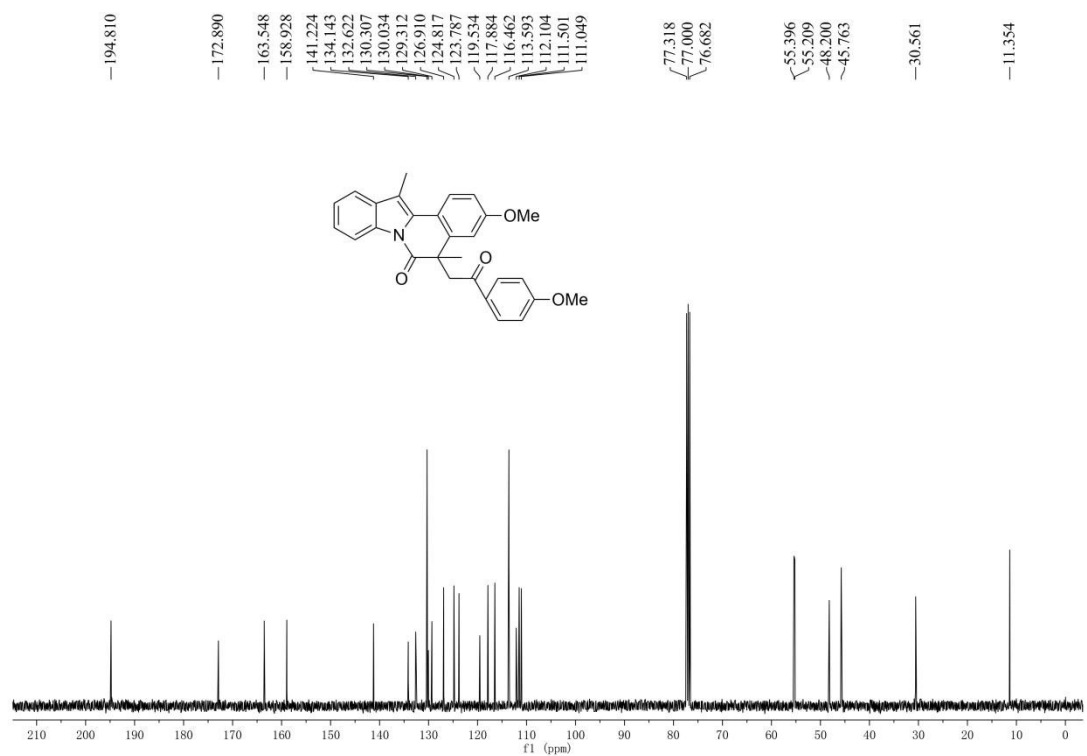

**3-Methoxy-5,12-dimethyl-5-(2-oxo-2-(p-tolyl)ethyl)indolo[2,1-a]isoquinolin-6(5H)-one (3aj)**

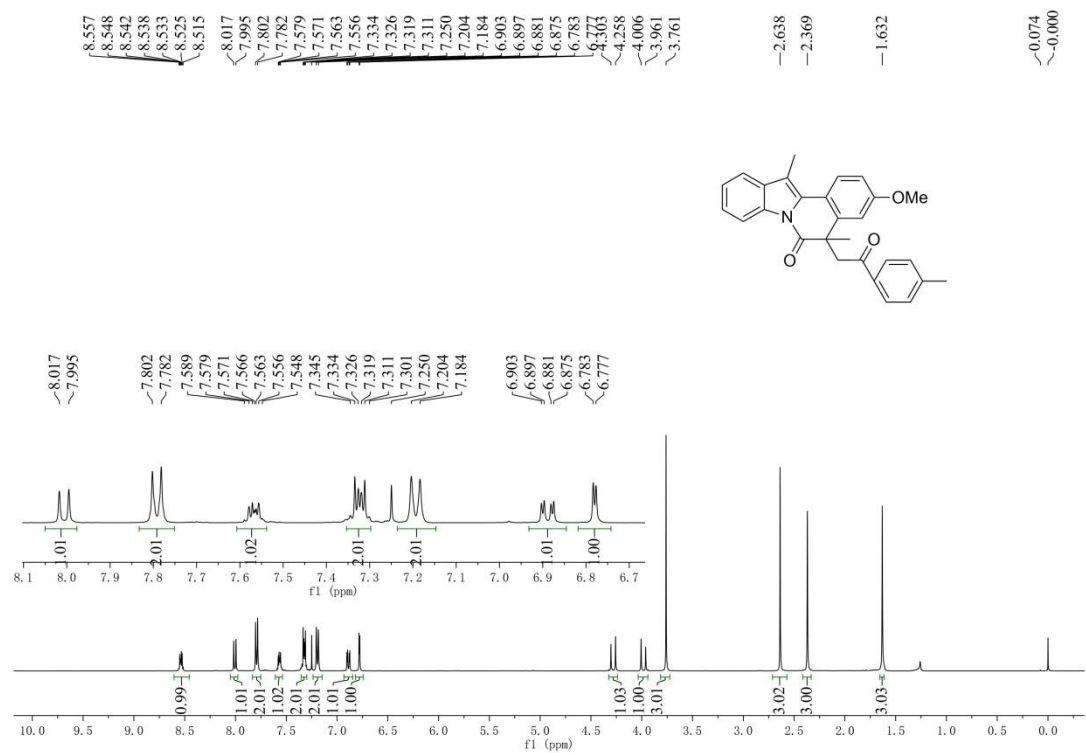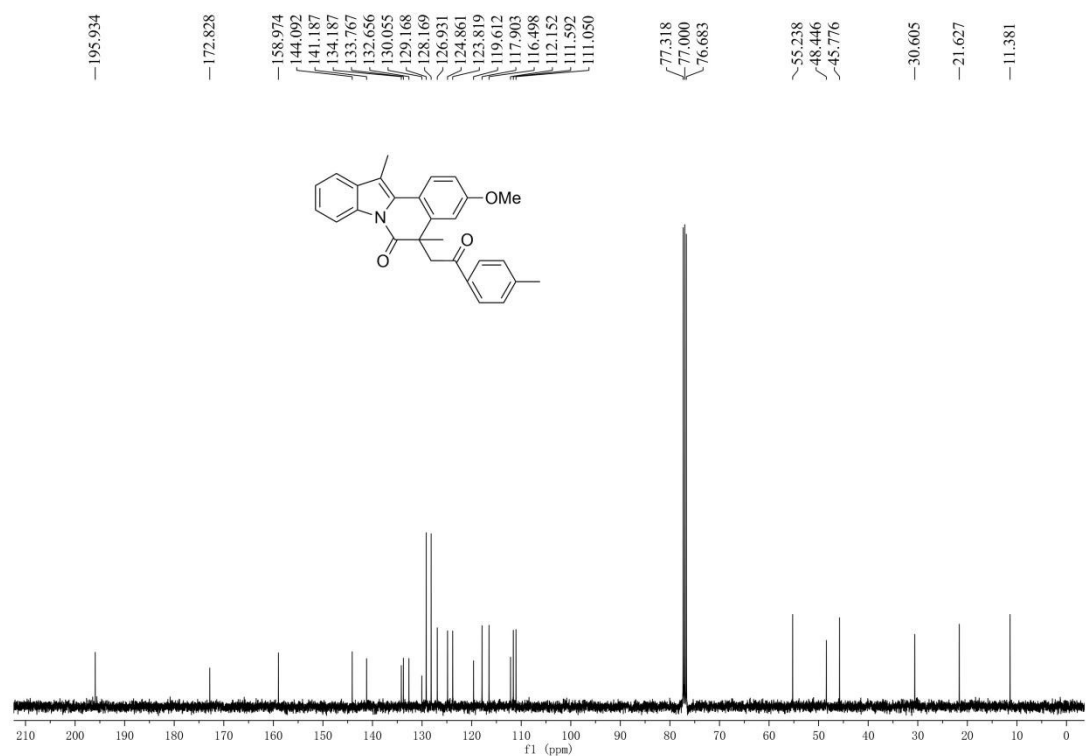

**5-(2-(4-Fluorophenyl)-2-oxoethyl)-3-methoxy-5,12-dimethylindolo[2,1-*a*]isoquinolin-6(5*H*)-one (3ak)**

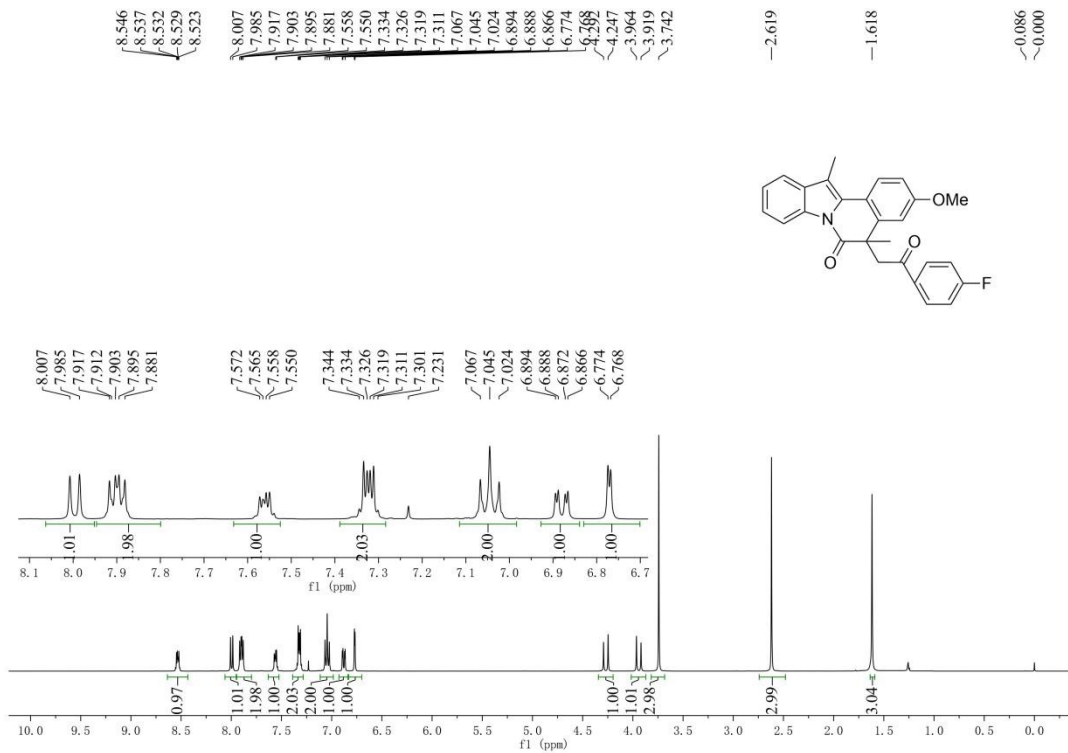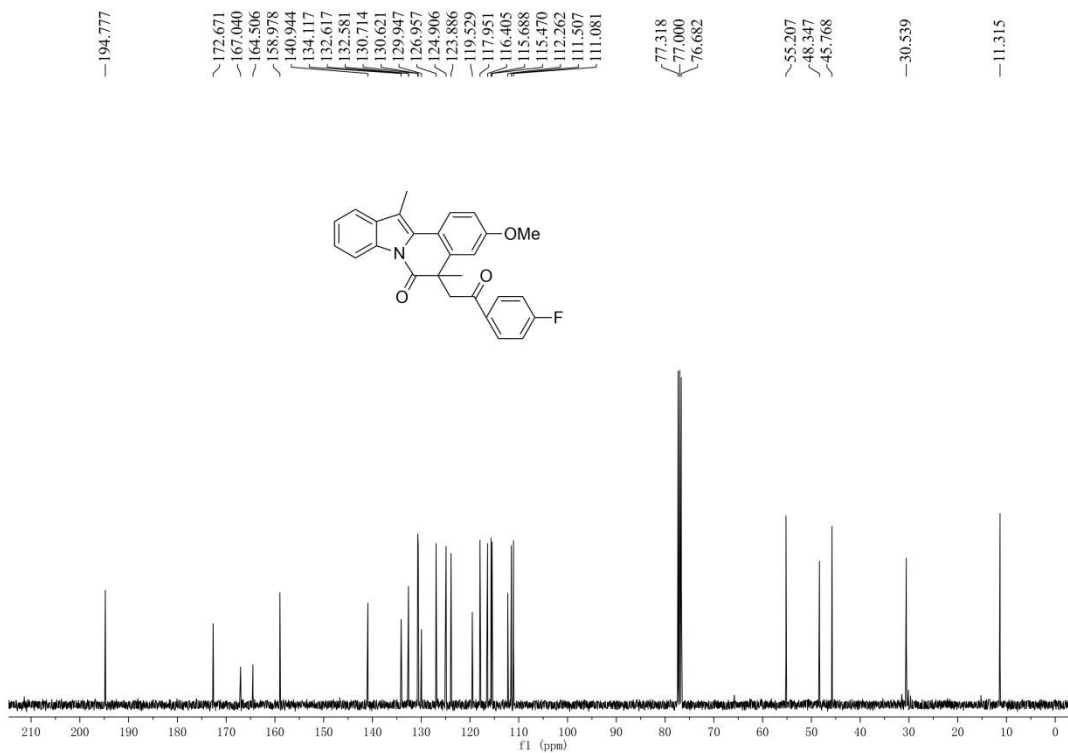



--104.617

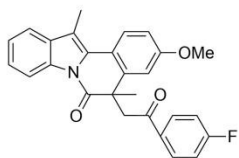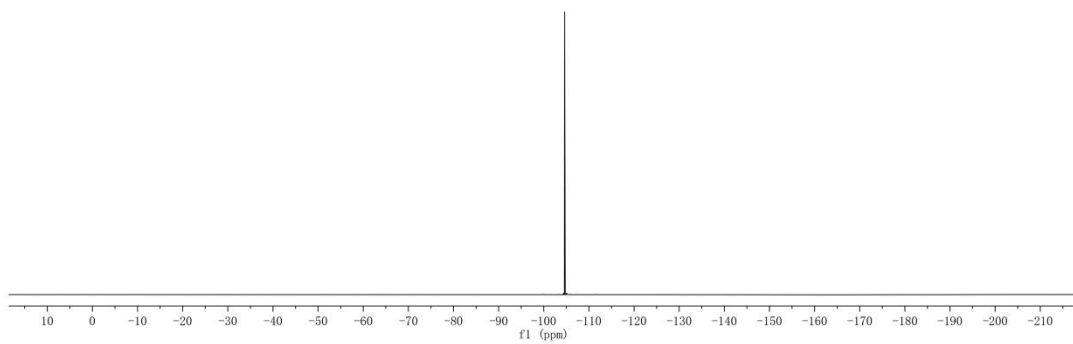

**5-(2-(4-Chlorophenyl)-2-oxoethyl)-3-methoxy-5,12-dimethylindolo[2,1-*a*]isoquinolin-6(5*H*)-one (3a)**

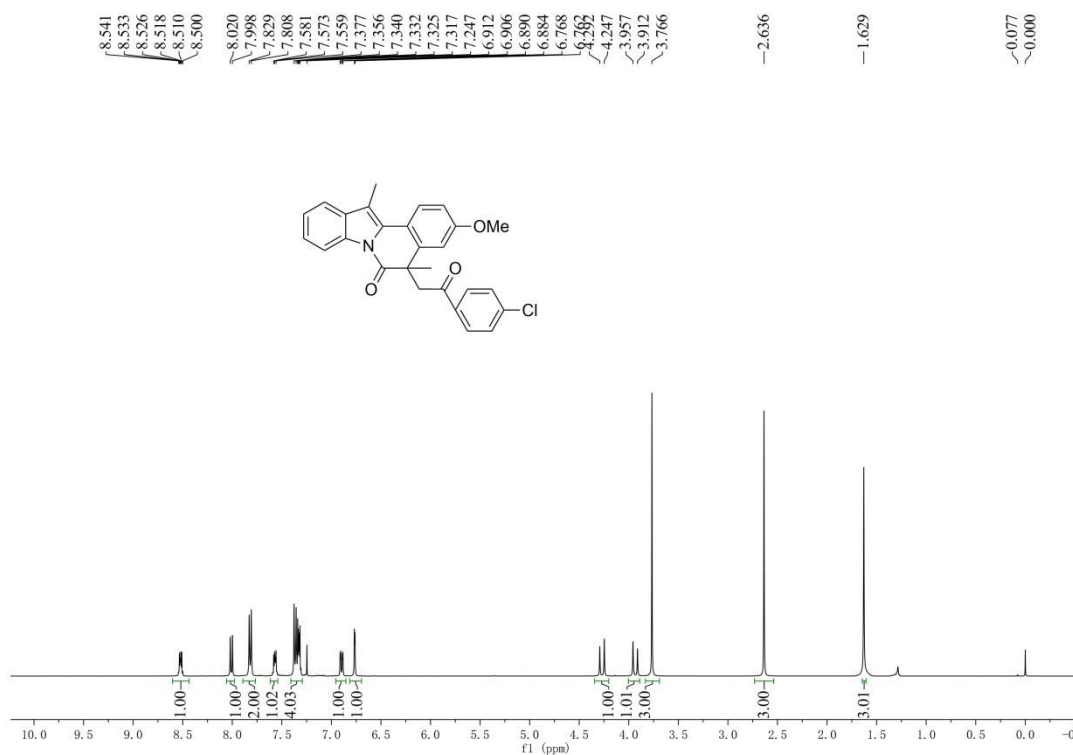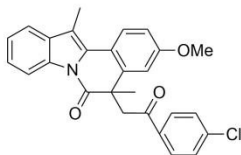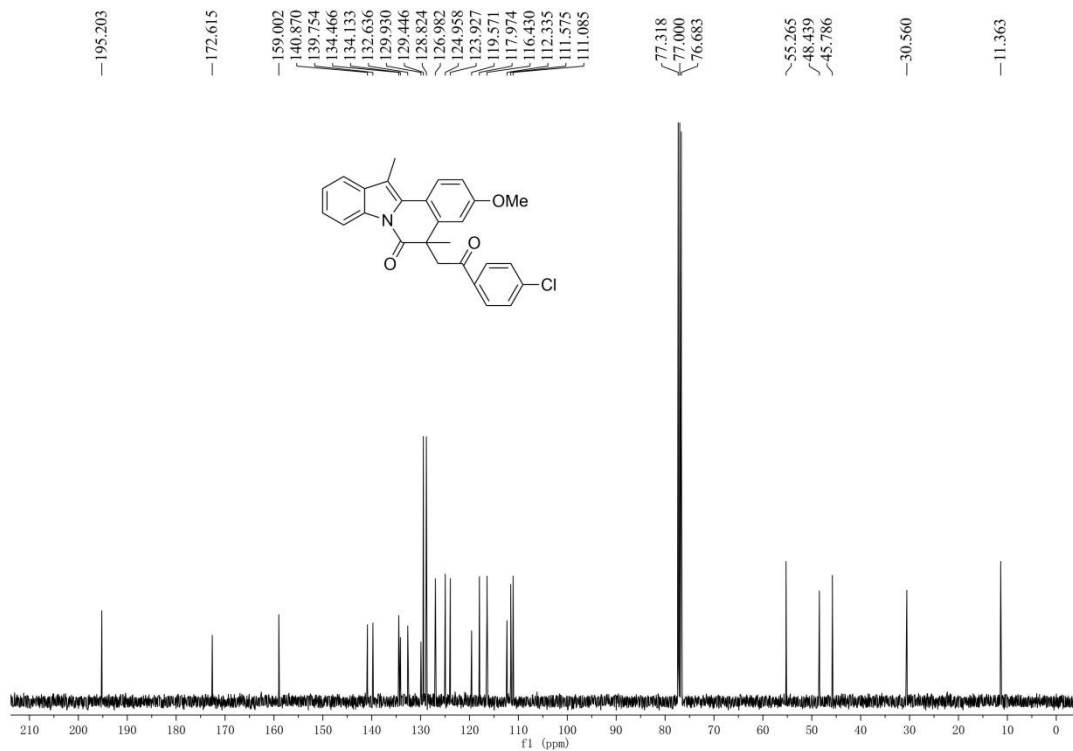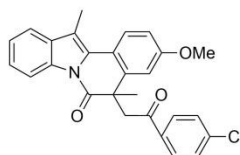

**5-(2-(4-Bromophenyl)-2-oxoethyl)-3-methoxy-5,12-dimethylindolo[2,1-*a*]isoquinolin-6(5*H*)-one (3am)**

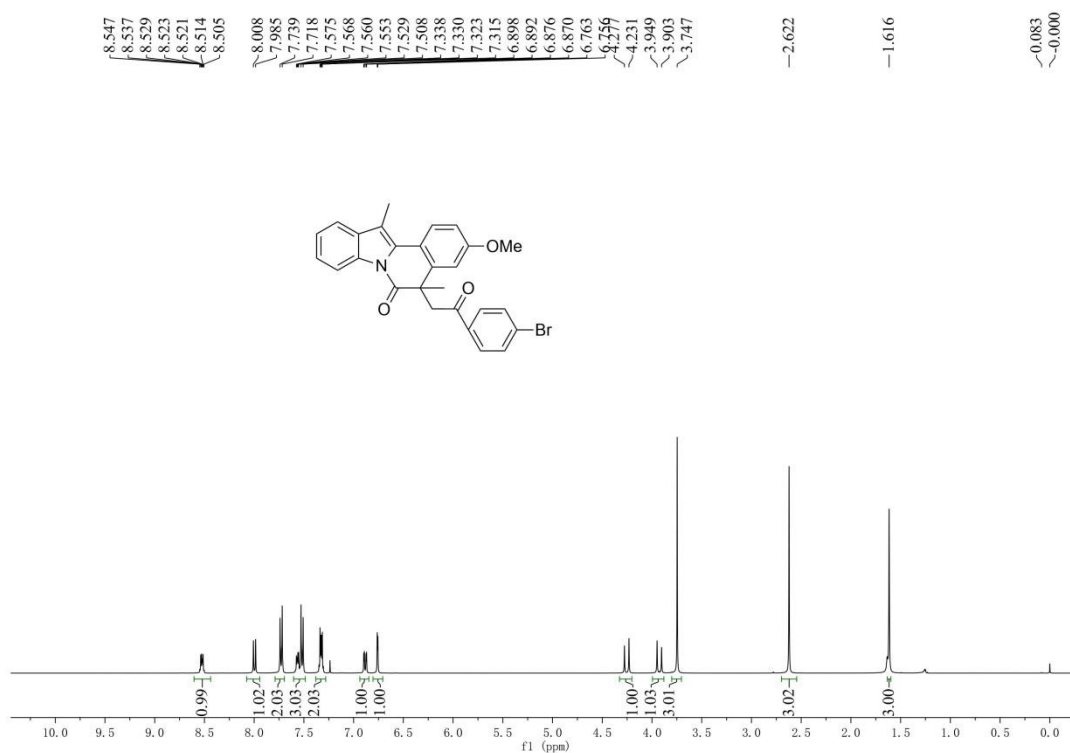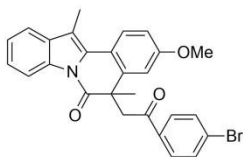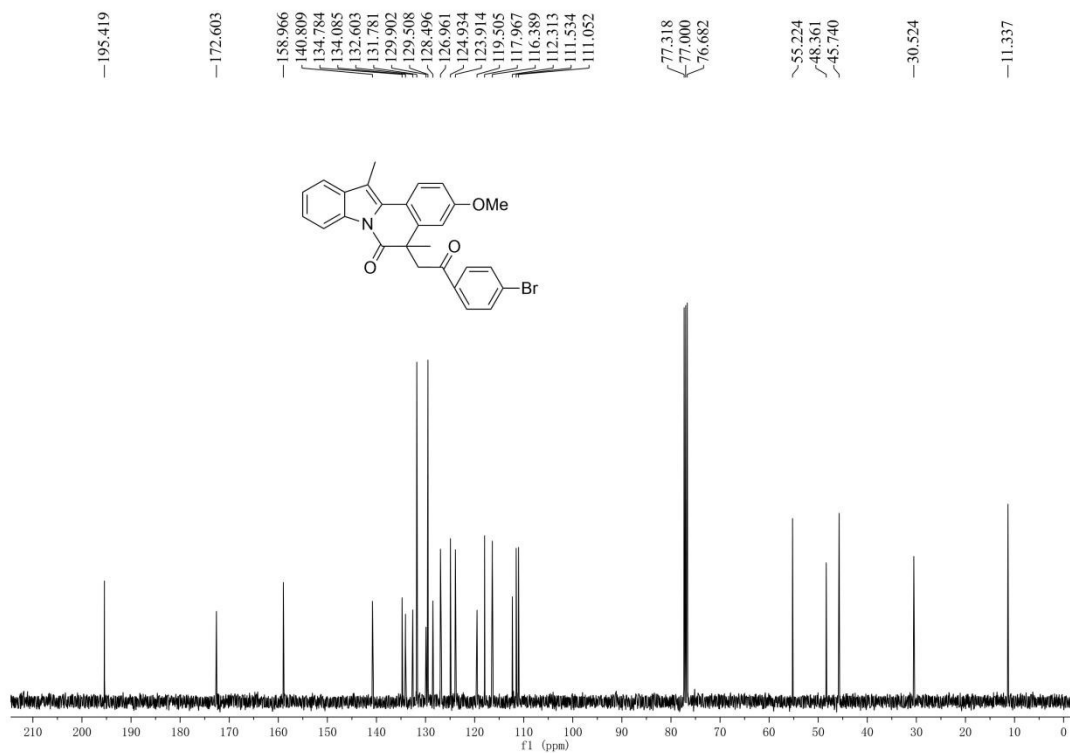

**3-Methoxy-5,12-dimethyl-5-(2-oxo-2-(m-tolyl)ethyl)indolo[2,1-*a*]isoquinolin-6(5*H*)-one (3an)**

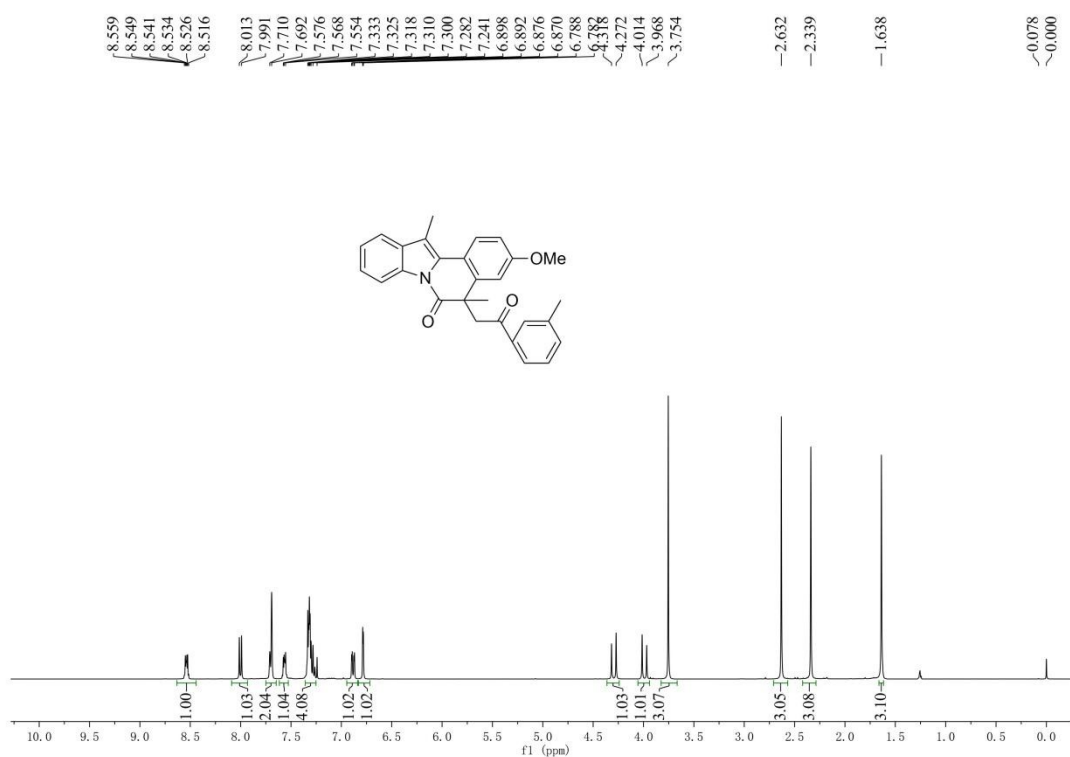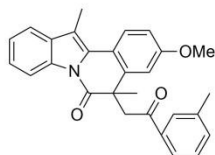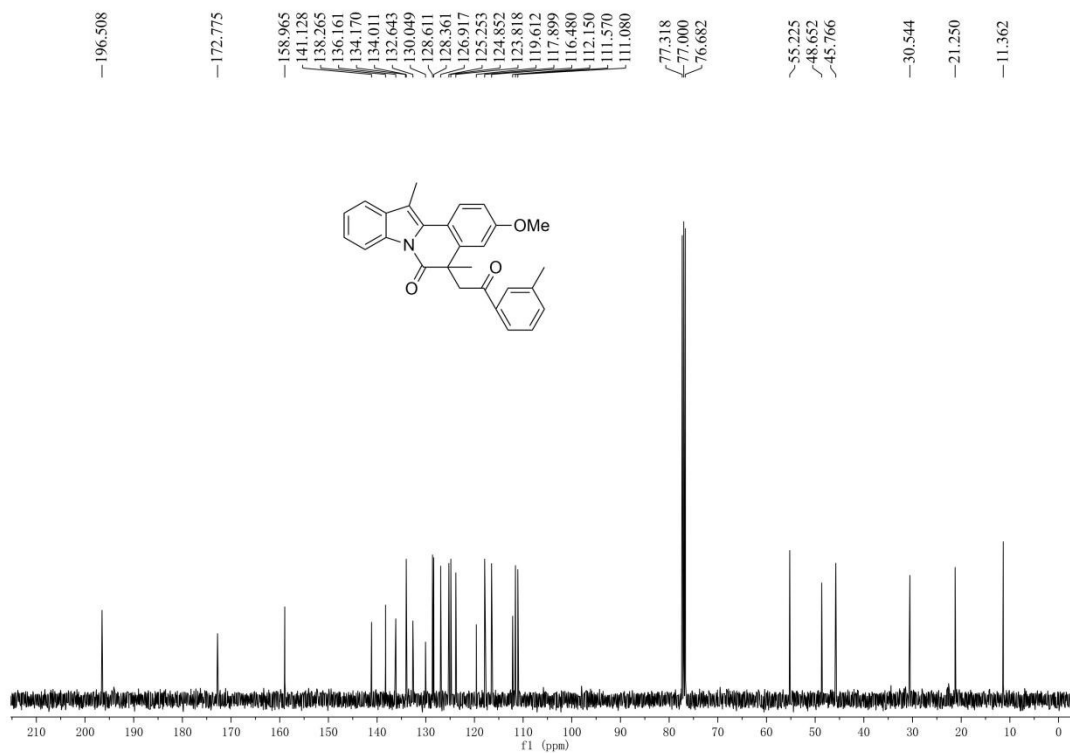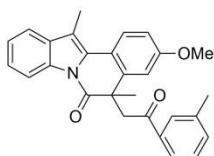

**3-Methoxy-5,12-dimethyl-5-(2-oxo-2-(o-tolyl)ethyl)indolo[2,1-a]isoquinolin-6(5H)-one (3ao)**

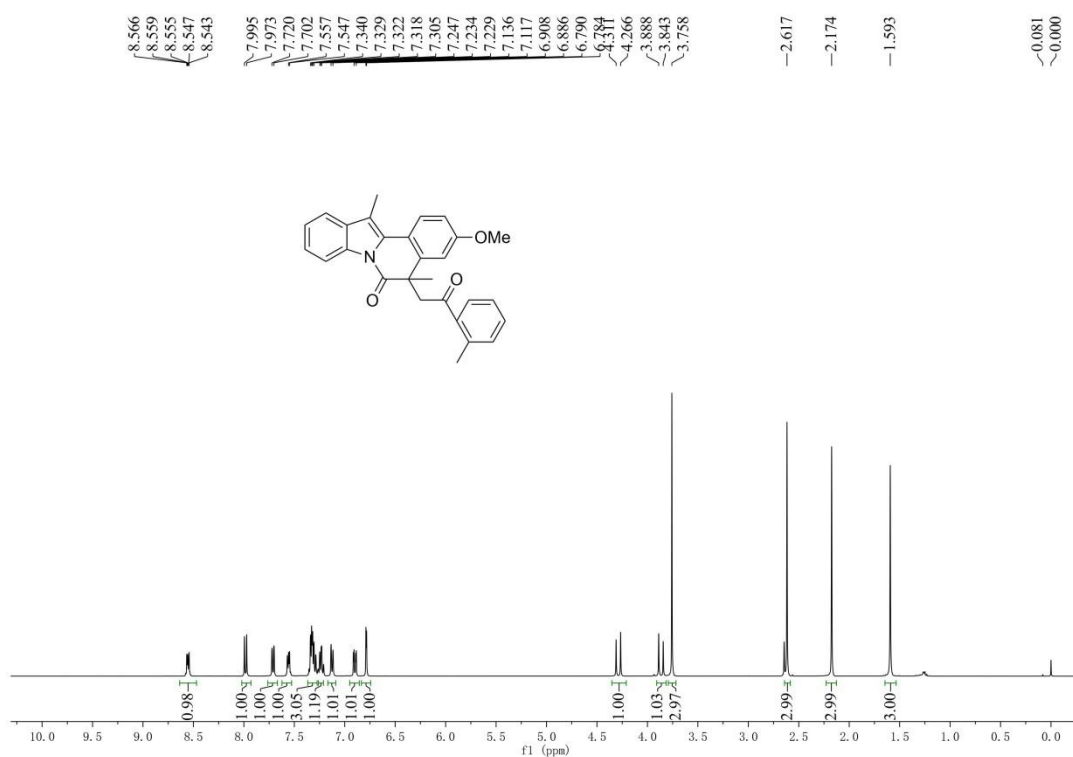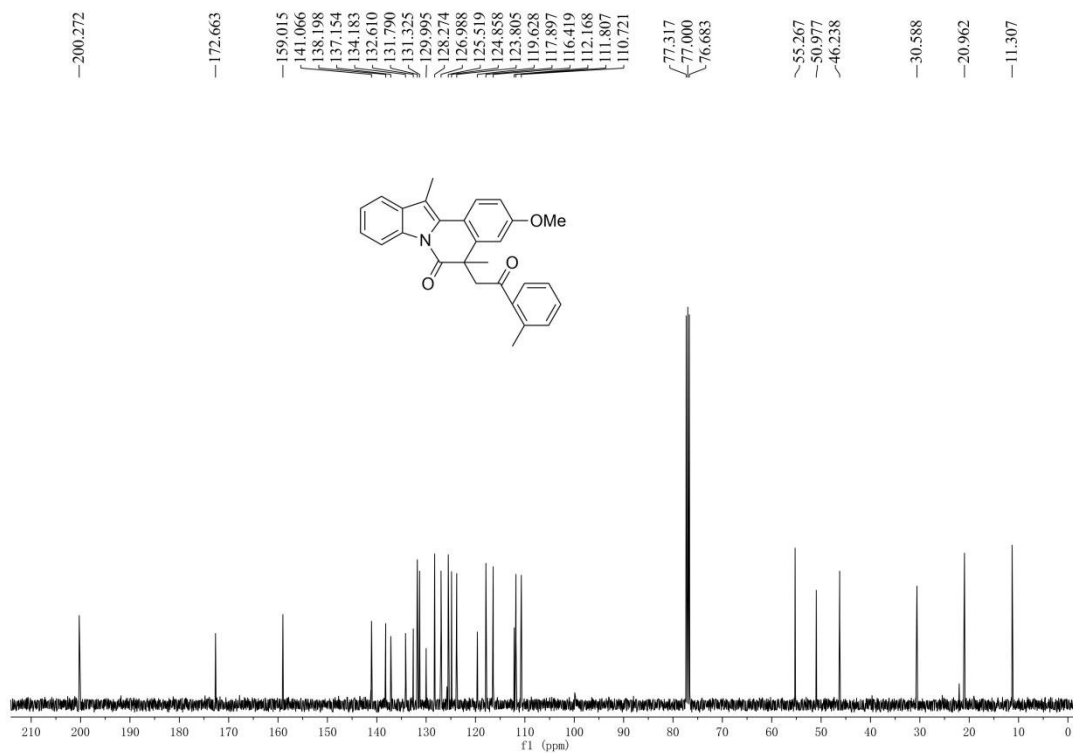

**3-Methoxy-5,12-dimethyl-5-(2-oxo-2-(thiophen-2-yl)ethyl)indolo[2,1-*a*]isoquinolin-6(5*H*)-one (3ap)**

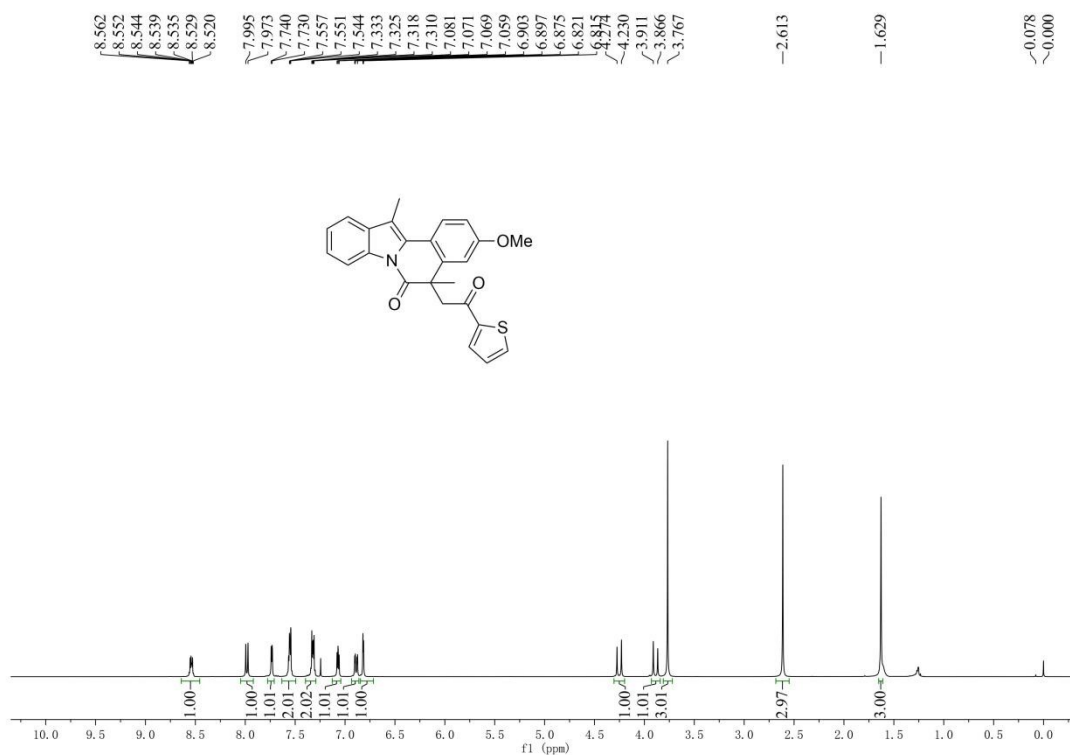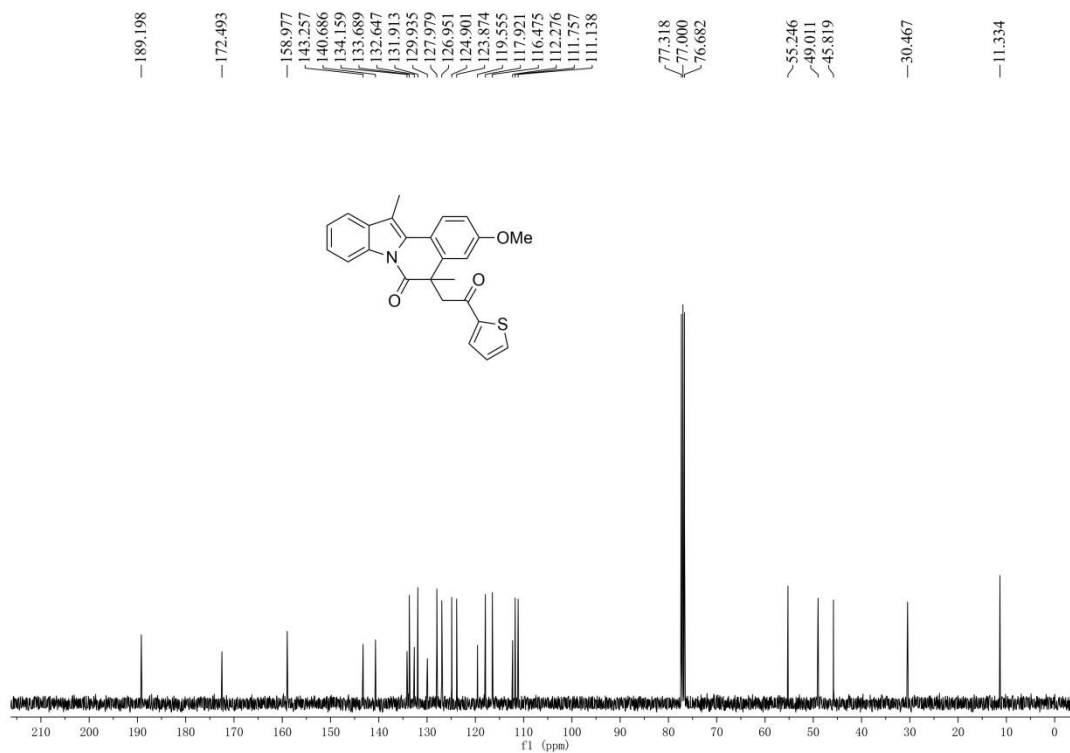

## 2,2,6,6-Tetramethylpiperidin-1-yl benzoate (4)

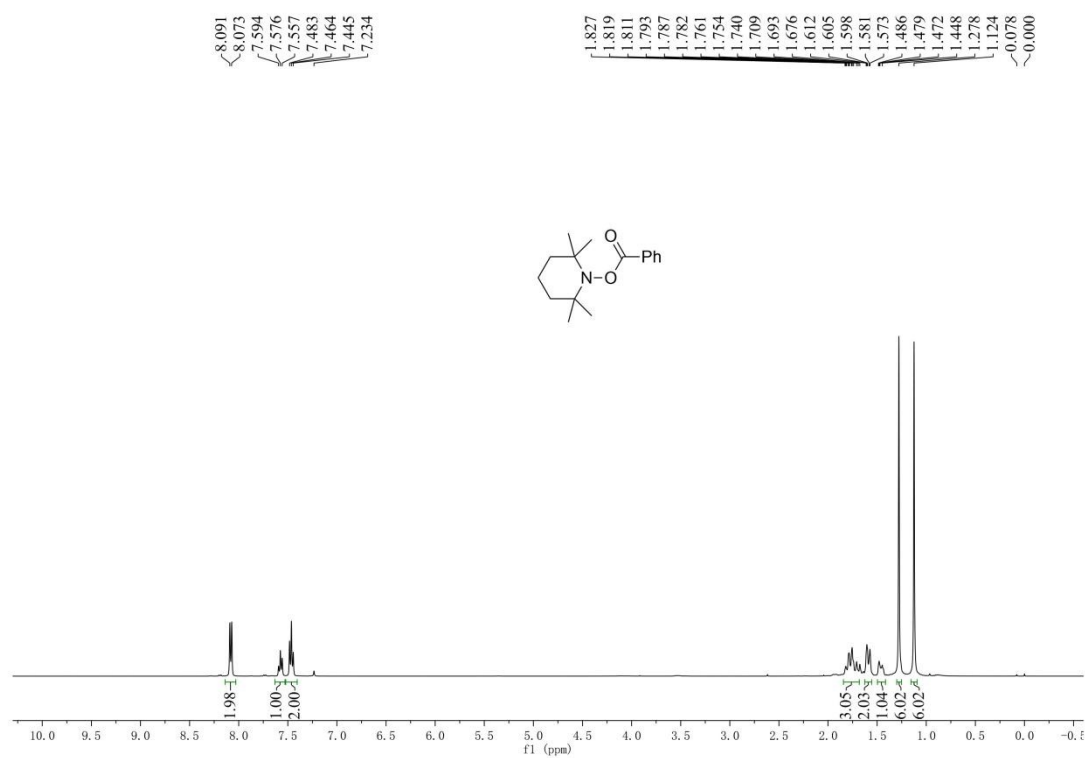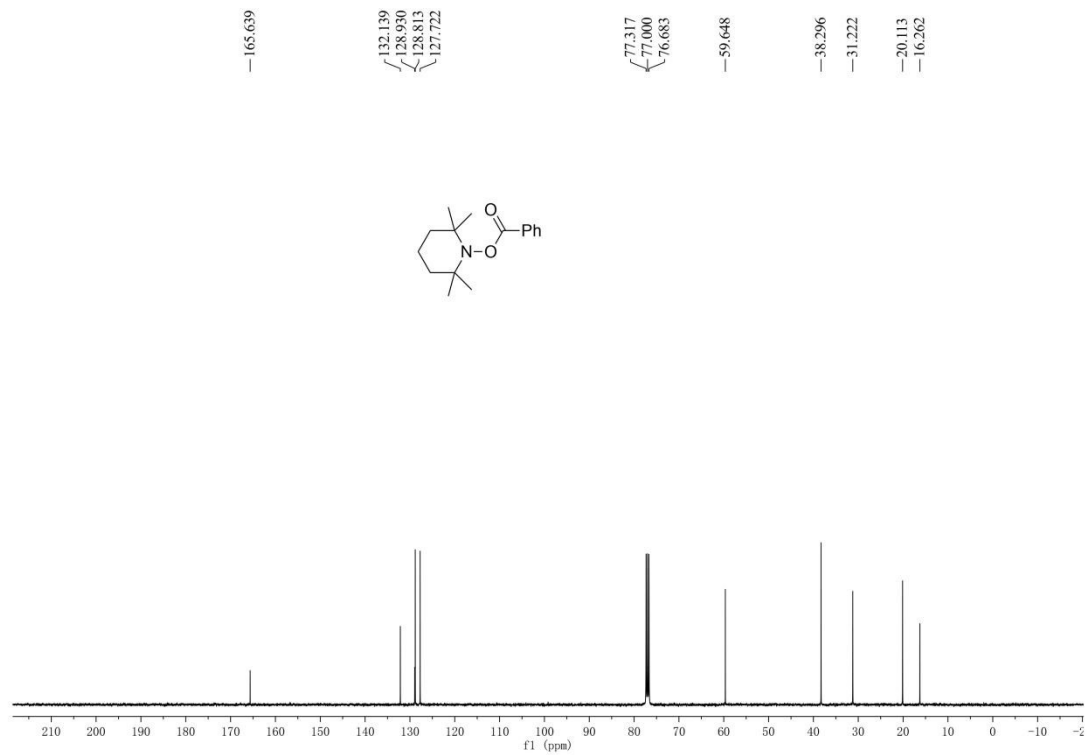

# 1,3,3-Triphenylprop-2-en-1-one (6)

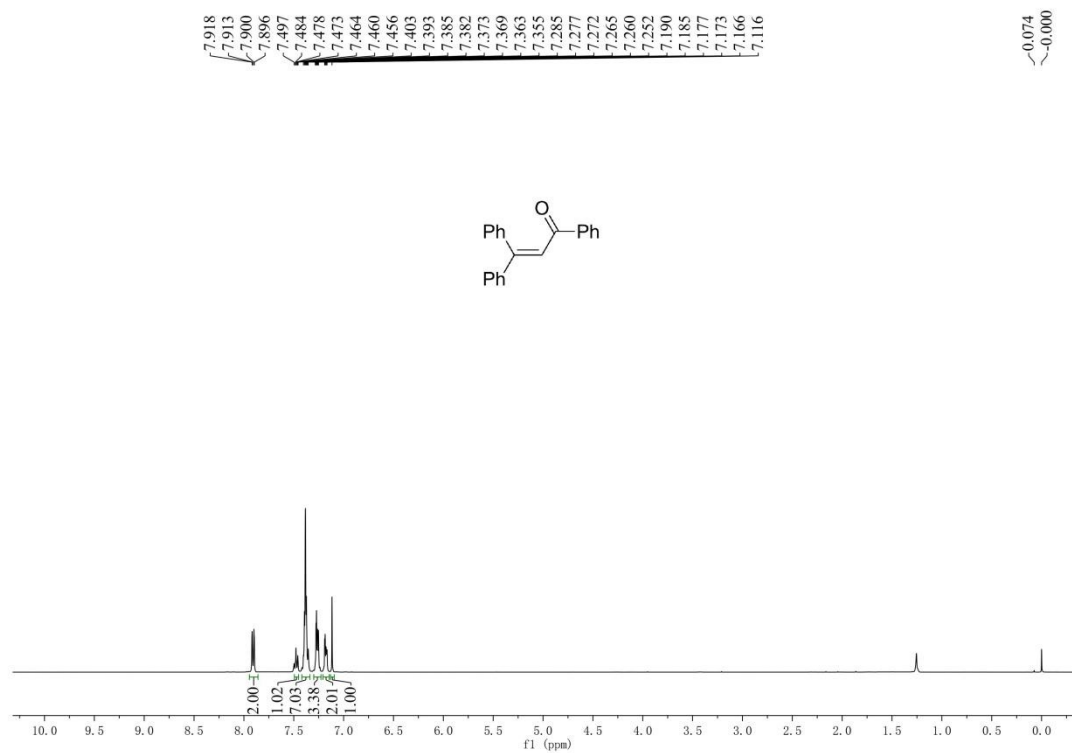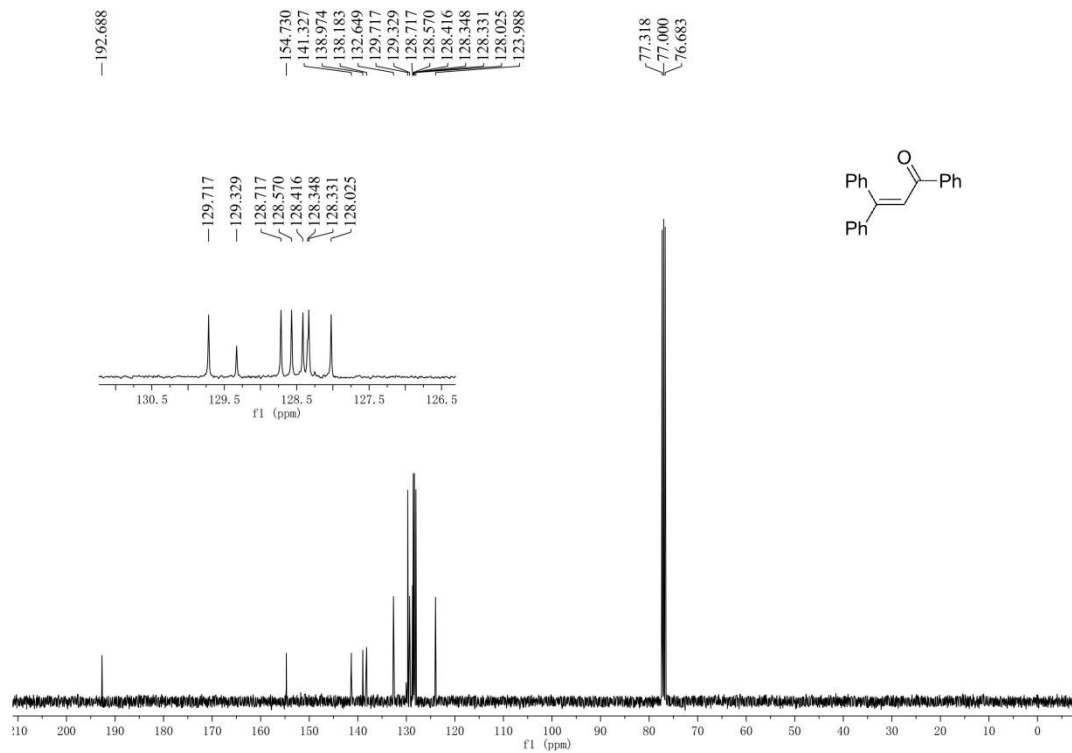

Supplement: d2ob00528j1.pdf [file d2ob00528j1.pdf]
